# Supplementary material for: Risk factors for disease-related deterioration following diagnostic bronchoalveolar lavage procedures in diffuse lung disease: a case-control study
Source: PeerJ. 2020 Sep 4;8:e9864. doi: 10.7717/peerj.9864 (PMC7476494; doi:10.7717/peerj.9864)
Supplement: Supplemental Information 1 [file peerj-08-9864-s001.xlsx]

## Sheet: 429_with_Progressive cases
	AEafterBAL	AEbeforeBAL	AE after BAL excluding beforeAE	age	female	diagnosis group	other	EP	HP	IP	IPF	infection	sarcoidosis	OP	lymphoproliferative disease	CVDIP	DRUG	PS	BT	BT≧38	CRP	KL-6	KL-6≧500	PaO2	PaO2≦60	Desaturation On Exertion	VC(L)	%VC	FVC(L)	%FVC	FEV1(L)	FEV1%G	DLCO	steroid at BAL	immunosuppressant	Antifibrotics	GGO	GGOnumber	consolidation	consolidationnumber	honeycombing	bronchoectasis	emphysema	CollectionRateOfBAL	cellconcentration10*5	macrophage%	macrophage	lymphocyte%	lymphocyte
1	0	0	0	60	1	CVDIP	0	0	0	0	0	0	0	0	0	1	0	0	36.6	0	0.04	1874	1	91	0	1	2.09	76.6	2.13	82.2	1.66	77.9	67.9	0	0	0	1	3	0	0	1	1	0	62.67	2.75	73.23	2.01383	25.53	0.702075
2	0	0	0	55	0	IP	0	0	0	1	0	0	0	0	0	0	0	0	36.3	0	0.05	781	1	91	0	0	3.33	78.2	3.34	80.3	2.98	89.2		0	0	0	1	3	0	0	0	1	0	38	2.24	96.31	2.15734	1.8	0.04032
3	0	0	0	67	1	sarcoidosis	0	0	0	0	0	0	1	0	0	0	0	0	35.9	0	0.09	430	0	78.6	0	0	2.28	106	2.33	115.9	1.81	77.7	76.9	0	0	0	1	3	0	0	0	0	0	54	1.89	72.99	1.37951	11.8	0.22302
7	1	0	1	16	0	EP	0	1	0	0	0	0	0	0	0	0	0	3	36.6	0	1.88	162	0	70.6	0	1	2.61	67.6	2.59	67.1	2.44	94.2		0	0	0	1	5	1	2	0	0	0	48	4.28	51	2.1828	13.34	0.570952
8	0	0	0	79	0	HP	0	0	1	0	0	0	0	0	0	0	0	0	36.4	0	0.01	1008	1	90	0	1	2.6	82	2.64	85.7	2.08	78.8	72.1	0	0	0	1	4	0	0	0	1	0	28.67	1.75	80.85	1.41487	16.73	0.292775
9	0	0	0	68	0	CVDIP	0	0	0	0	0	0	0	0	0	1	0	0	36.4	0	0.12	2303	1	89.3	0	1	3.38	93.9	3.31	94.3	2.73	82.5	79.2	0	0	0	1	2	0	0	1	1	0	30	1.33	60.69	0.807177	23.74	0.315742
11	0	0	0	71	0	IP	0	0	0	1	0	0	0	0	0	0	0	0	35.9	0	0.01	2889	1	89.3	0	1	2.76	79.1	2.77	81.5	2.22	80.1		0	0	0	1	1	0	0	0	1	0	60	1.8	39.15	0.7047	60.75	1.0935
12	0	0	0	70	0	infection	0	0	0	0	0	1	0	0	0	0	0	0	36.8	0	2.16	765	1	104	0	0	1.98	52.9	2.03	55.9	1.97	97		0	0	0	1	1	1	4	0	1	0	30	1.6	74.06	1.18496	16.76	0.26816
13	0	0	0	56	0	IP	0	0	0	1	0	0	0	0	0	0	0	0	36	0	0.12	957	1	82.2	0	0	2.67	63	2.58	62.3	2.07	80.2	65.6	0	0	0	1	2	0	0	0	0	0	25.33	2	54.77	1.0954	43.93	0.8786
14	0	0	0	80	1	HP	0	0	1	0	0	0	0	0	0	0	0	0	36.8	0	0.09	1194	1	104	0	1								0	0	0	1	3	1	1	0	1	0	32.67	2.96	60.5	1.7908	33.1	0.97976
15	0	0	0	66	1	sarcoidosis	0	0	0	0	0	0	1	0	0	0	0	0	36	0	0.01	243	0	104	0	0	2.9	111.1	2.86	116.3	2.08	72.7	88.4	0	0	0	1	3	0	0	0	0	0	59.33	2.62	52.57	1.37733	44.2	1.15804
16	1	1	0	80	0	HP	0	0	1	0	0	0	0	0	0	0	0	0	36.4	0	4.23	7298	1	60	1	1								0	0	0	1	5	0	0	0	1	0	61.33	2.19	78.82	1.72616	8.11	0.177609
17	0	0	0	74	0	OP	0	0	0	0	0	0	0	1	0	0	0	0	35.8	0	11.85			73	0	0								0	0	0	1	3	1	2	0	0	0	50.67	1.79	68.26	1.22185	26.31	0.470949
18	0	0	0	51	0	other	1	0	0	0	0	0	0	0	0	0	0	0	36.1	0	0.05	6087	1	65.8	0	1	2.51	65.9	2.5	66.7	2.03	81.2	51.9	0	0	0	1	1	0	0	0	0	0	28	11.01	16.31	1.79573	83.69	9.21427
19	0	0	0	62	0	IP	0	0	0	1	0	0	0	0	0	0	0	0	36.3	0	0.44	807	1	72.8	0	1	3.43	88.4	3.18	84.1	2.8	88.1	71.7	0	0	0	0	0	0	0	1	1	0	15.33	1.64	73.61	1.2072	9.21	0.151044
20	0	0	0	80	0	CVDIP	0	0	0	0	0	0	0	0	0	1	0	1	37	0	11.6	458	0	82	0	0								0	0	0	1	4	1	2	1	1	0	54	1.96	77.17	1.51253	16.88	0.330848
21	0	0	0	78	1	OP	0	0	0	0	0	0	0	1	0	0	0	2	36.8	0	0.48	260	0	86.2	0	0								0	0	0	0	0	1	4	0	1	0	22.67	5.28	58.59	3.09355	25.01	1.32053
22	0	0	0	73	1	sarcoidosis	0	0	0	0	0	0	1	0	0	0	0	0	37	0	0.11	560	1	78.6	0	0	1.66	78.3	1.73	87.4	1.05	60.7	71.6	0	0	0	1	4	0	0	0	0	0	47.33	0.42	58.84	0.247128	35.76	0.150192
24	0	0	0	52	1	infection	0	0	0	0	0	1	0	0	0	0	0	0	36.7	0	6.55	277	0	104	0	0								1	0	0	0	0	1	2	0	0	0
25	0	0	0	76	0	infection	0	0	0	0	0	1	0	0	0	0	0	0	36.1	0	5.37	349	0	78.7	0	0								1	1	0	1	2	0	0	0	0	1	12.67	4.69	25.85	1.21237	9.08	0.425852
26	0	0	0	76	0	other	1	0	0	0	0	0	0	0	0	0	0	0	36.4	0	0.78	253	0	95.9	0	0	3.53	101.1	3.54	104.7	2.6	73.4	115.3	0	0	0	1	2	0	0	0	0	0	52	1.15	82.83	0.952545	15.53	0.178595
27	0	0	0	59	0	IP	0	0	0	1	0	0	0	0	0	0	0	0	36.3	0	0.01	748	1	87.6	0	1	3.04	80.4	2.98	80.5	2.34	78.5	66.1	0	0	0	1	2	0	0	1	1	0	29.33	1.6	90.63	1.45008	6.51	0.10416
28	0	0	0	70	1	infection	0	0	0	0	0	1	0	0	0	0	0	0	36.4	0	0.02			86.8	0	0								0	0	0	1	1	1	1	0	0	0	45.33	0.87	89.01	0.774387	6.13	0.053331
29	0	0	0	56	1	OP	0	0	0	0	0	0	0	1	0	0	0	0	36.6	0	0.59	218	0	84.6	0	0	2.75	100.7	2.73	105.4	2.38	87.2	122.8	0	0	0	1	5	1	5	0	1	0	26	1.04	77.22	0.803088	8.9	0.09256
30	0	0	0	35	0	sarcoidosis	0	0	0	0	0	0	1	0	0	0	0	0	36.5	0	0.04	180	0	83.1	0	0	4.76	102.8	4.77	104.6	4.04	84.7	115.9	0	0	0	1	4	0	0	0	0	0	41.33	0.84	76.4	0.64176	21.83	0.183372
31	0	0	0	67	1	IP	0	0	0	1	0	0	0	0	0	0	0	0	36	0	0.03	1893	1	68.3	0	1								0	0	0	1	5	0	0	0	1	0	58	1.6	90.51	1.44816	5.99	0.09584
32	0	0	0	15	0	CVDIP	0	0	0	0	0	0	0	0	0	1	0	0	36.4	0	0.27	3689	1	96	0	0	2.33	56.3	2.29	55.3	2.12	92.6	52.4	0	0	0	1	3	0	0	0	1	0	63.33	7.15	72.72	5.19948	18.11	1.29487
33	0	0	0	26	0	sarcoidosis	0	0	0	0	0	0	1	0	0	0	0	0	36.6	0	0.12			91	0	0	4	85.1	3.95	84.9	3.69	93.4	96.3	0	0	0	0	0	1	1	0	0	0	43.33	3.34	76.2	2.54508	23.57	0.787238
34	0	0	0	47	0	sarcoidosis	0	0	0	0	0	0	1	0	0	0	0	0	36.1	0	0.21	456	0	71.6	0	0	3.05	75.1	2.93	73.4	2.29	78.2	89.1	0	0	0	1	5	0	0	0	0	0	52	2.31	66.95	1.54655	31.97	0.738507
35	0	0	0	67	1	EP	0	1	0	0	0	0	0	0	0	0	0	0	36.6	0	0.05	338	0	71.9	0									0	0	0	1	2	1	2	0	1	0	38	10.42	12.32	1.28374	5.35	0.55747
36	0	0	0	68	1	CVDIP	0	0	0	0	0	0	0	0	0	1	0	0	36.3	0	0.08	299	0	95.5	0	0	2.52	101.6	2.38	102.1	1.87	78.6	74.1	0	0	0	0	0	0	0	1	1	0	57.33	1.1	95.07	1.04577	2.73	0.03003
37	0	0	0	70	0	IPF	0	0	0	0	1	0	0	0	0	0	0	0	36.3	0	0.3	553	1	84.2	0	1	3.81	107	3.88	111.8	3.26	84	52.8	0	0	0	0	0	0	0	1	1	1	17.33	4.12	40.15	1.65418	4.52	0.186224
38	0	1	0	63	0	OP	0	0	0	0	0	0	0	1	0	0	0	0	37.1	0	4.32	415	0	68.2	0	0	2.85	69.2	2.9	72.3	2.48	85.5	58.3	0	0	0	1	5	1	2	0	0	0	26.67	5.32	96.05	5.10986	2.72	0.144704
40	0	0	0	69	0	DRUG	0	0	0	0	0	0	0	0	0	0	1	0	36.4	0	0.02	1688	1	85.1	0	1	3.05	87.4	2.95	86.5	2.86	96.9	61	0	0	0	0	0	0	0	1	1	1	38.67	2.28	46.13	1.05176	45.93	1.0472
41	0	0	0	66	1	IP	0	0	0	1	0	0	0	0	0	0	0	0	36.5	0	0.06	230	0	84.7	0	1	2.45	93.2	2.57	103.6	2.18	84.8	95.3	0	0	0	1	3	1	2	0	0	0	66.67	2.87	96.5	2.76955	1.48	0.042476
42	0	0	0	72	1	other	1	0	0	0	0	0	0	0	0	0	0	0	36.2	0	0.72	587	1	65.2	0	0	1.96	84.8	1.93	89.4	1.39	72	102.9	0	0	0	1	5	1	2	0	1	0	58.67	5.13	27.89	1.43076	1.37	0.070281
43	0	0	0	79	0	OP	0	0	0	0	0	0	0	1	0	0	0	0	35.8	0	1.76	483	0	77.6	0	0								0	0	0	1	4	0	0	0	1	0	56	5.43	8.23	0.446889	90.93	4.9375
44	0	0	0	68	1	other	1	0	0	0	0	0	0	0	0	0	0	0	36.5	0	0.83			73.4	0	0	2.44	91.4	2.33	92.5	1.41	60.5		0	0	0	1	3	0	0	0	0	0	39.33	10.47	22.89	2.39658	5.32	0.557004
45	0	0	0	65	0	CVDIP	0	0	0	0	0	0	0	0	0	1	0	0	36.5	0	1.76	672	1	96.3	0	0	3.4	97.4	3.43	100.3	2.89	84.3	83.1	0	0	0	0	0	0	0	0	1	1	30	3.3	80.89	2.66937	12.42	0.40986
46	0	0	0	61	1	CVDIP	0	0	0	0	0	0	0	0	0	1	0	0	36.5	0	0.93	2115	1	87.9	0	0	2.45	90.1	2.52	98.1	2.01	79.8	65	0	0	0	1	3	0	0	0	1	0	21.33	1.08	45.3	0.48924	7.48	0.080784
49	0	0	0	61	1	other	1	0	0	0	0	0	0	0	0	0	0	1	36.1	0	0.2	558	1	92.3	0	0	2.11	71.8	1.75	62.7	1.39	79.4	73.6	0	0	0	1	2	0	0	0	0	0	55.33	2.35	50.24	1.18064	46.67	1.09675
50	0	0	0	70	0	DRUG	0	0	0	0	0	0	0	0	0	0	1	0	36.3	0	0.33	1034	1	89.4	0	0	1.95	52.6	1.75	48.5	1.75	100		0	0	0	0	0	0	0	1	1	0	29.33	5.86	64.2	3.76212	4.88	0.285968
51	0	0	0	69	0	IP	0	0	0	1	0	0	0	0	0	0	0	0	36.8	0	0.03	1131	1	89.7	0	0	3.53	107.6	3.56	110.9	2.65	74.4	92.3	0	0	0	1	4	0	0	0	1	0	50.67	1.65	83.38	1.37577	12.13	0.200145
52	0	0	0	66	1	IPF	0	0	0	0	1	0	0	0	0	0	0	0	35.5	0	0.27	1105	1	66	0	1	2.42	95.7	2.39	100.4	1.6	66.9	44.4	0	0	0	1	2	0	0	0	0	1	41.33	4.93	82.44	4.06429	3.32	0.163676
53	0	0	0	64	1	DRUG	0	0	0	0	0	0	0	0	0	0	1	0	37.1	0	0.68	655	1	74.9	0	0	2.92	104.7	2.84	107.6	2.07	72.9	61.4	0	0	0	1	5	1	5	0	0	0	38.67	2.96	54.92	1.62563	39.63	1.17305
54	0	0	0	56	1	IPF	0	0	0	0	1	0	0	0	0	0	0	0	36.5	0	0.09	663	1	98.3	0	0	1.95	68.2	1.93	71	1.61	83.4	74.4	0	0	0	1	2	0	0	1	1	1	50	1.48	77.19	1.14241	14.58	0.215784
56	0	0	0	69	1	CVDIP	0	0	0	0	0	0	0	0	0	1	0	0	34.5	0	0.03	791	1	79.3	0	1	2.63	94.6	2.72	103.8	2.18	80.1	72.1	0	0	0	1	4	0	0	0	0	0	48	1.27	72.54	0.921258	21.54	0.273558
58	0	1	0	78	1	IP	0	0	0	1	0	0	0	0	0	0	0	0	36.8	0	0.41	2835	1	70.4	0	1								0	0	0	1	5	0	0	0	0	1	55.33	3.79	61.34	2.32479	31.06	1.17717
59	0	0	0	49	1	CVDIP	0	0	0	0	0	0	0	0	0	1	0	0	37.7	0	0.68	304	0	86.2	0	0	2.11	74.3	1.97	72.7	1.62	82.2	68.1	0	0	0	0	0	1	2	0	0	0	19.33	2.13	55.58	1.18385	37.59	0.800667
60	0	0	0	65	0	IP	0	0	0	1	0	0	0	0	0	0	0	0	36	0	0.26	679	1	59	1	1	3.56	97.5	3.61	101.4	3.23	89.5	84.2	0	0	0	1	3	0	0	0	1	0	51.33	1.55	84.08	1.30324	10.72	0.16616
61	0	0	0	66	1	other	1	0	0	0	0	0	0	0	0	0	0	0	36.6	0	0.07	282	0	91.2	0	0	2.21	96.1	2	92.6	1.25	62.5		0	0	0	1	3	0	0	0	0	0	38.67	1.36	63.58	0.864688	6.98	0.094928
62	0	0	0	77	0	sarcoidosis	0	0	0	0	0	0	1	0	0	0	0	0	35.7	0	0.03	285	0	84.9	0	0	3.69	129.5	3.79	136.3	2.29	60.4	86.5	0	0	0	1	1	0	0	0	0	1	14	0.75	74.2	0.5565	24.2	0.1815
64	0	0	0	70	0	IPF	0	0	0	0	1	0	0	0	0	0	0	0	36.3	0	0.12	1338	1	61.4	0	1	2.38	67.8	2.44	71.3	2.07	84.8	60.9	0	0	0	0	0	0	0	1	1	0	46.67	3.37	97.01	3.26924	1.45	0.048865
65	0	0	0	70	0	IP	0	0	0	1	0	0	0	0	0	0	0	0	36.7	0	0.09	1724	1	99.5	0	1	2.76	82.4	2.67	81.7	2.22	83.1	79.1	0	0	0	1	4	0	0	1	1	0	46.67	2.63	64.11	1.68609	8.09	0.212767
66	0	0	0	72	0	IP	0	0	0	1	0	0	0	0	0	0	0	0	36.4	0	0.09	887	1	86.2	0	1	2.65	74.4	2.6	75.1	1.69	65	64.9	0	0	0	1	3	0	0	0	0	0	48.67	2.21	77.76	1.7185	21.35	0.471835
67	0	0	0	76	1	HP	0	0	1	0	0	0	0	0	0	0	0	2	36.7	0	0.09	918	1	65.4	0	1	2.08	88.5	2.04	93.2	1.63	79.9	60.8	0	0	0	1	5	0	0	0	0	0	51.33	2.93	65.38	1.91563	29.14	0.853802
68	0	0	0	76	0	IP	0	0	0	1	0	0	0	0	0	0	0	2	36.7	0	1.12	365	0	90.8	0	0								0	0	0	1	4	1	2	0	0	0	53.33	3.37	94.84	3.19611	3.12	0.105144
69	0	0	0	64	0	OP	0	0	0	0	0	0	0	1	0	0	0	0	35.9	0	2.28	1254	1	73.9	0	0	3.53	89.8	3.39	88.5	2.5	73.7	113.7	0	0	0	1	2	1	2	0	0	0	34.67	3.45	47.87	1.65152	44.29	1.52801
70	0	0	0	23	1	other	1	0	0	0	0	0	0	0	0	0	0	0	36.8	0	0.36	348	0	75.3	0	1	2.24	65.5	2.16	65.3	1.71	79.2	67.9	1	0	0	1	4	1	2	0	1	0	58	9.31	50.5	4.70155	1.35	0.125685
71	0	0	0	75	0	IP	0	0	0	1	0	0	0	0	0	0	0	0	36.5	0	0.16	836	1	69.9	0	1	2.65	69.7	2.62	71.2	2.22	84.7	48.3	0	0	0	1	3	0	0	0	1	1	14.67	0.82	82.31	0.674942	8.43	0.069126
72	0	0	0	64	0	infection	0	0	0	0	0	1	0	0	0	0	0	0	36.4	0	1.6	236	0	78.5	0	0	3.95	98.3	4.09	104.3	3.21	78.5	149	0	0	0	1	4	0	0	0	0	0	34	4.36	61.13	2.66527	25.75	1.1227
73	1	0	1	68	0	other	1	0	0	0	0	0	0	0	0	0	0	0						？		0								0	0	0	1	4	1	3	0	0	0	25.33	2	70.7	1.414	21.8	0.436
75	0	0	0	64	0	IPF	0	0	0	0	1	0	0	0	0	0	0	2	36.5	0	0.53	869	1	68.9	0	1	1.68	45.5	1.47	40.8	1.47	100		0	0	0	1	3	1	1	1	1	1	17.33	1.62	72.16	1.16899	2.79	0.045198
76	0	0	0	49	1	sarcoidosis	0	0	0	0	0	0	1	0	0	0	0	0	36.2	0	0.08	1312	1	85	0	0	3.82	104.1	3.81	108.5	2.83	74.3	69.2	0	0	0	1	5	0	0	0	0	0	61.33	9.55	31.63	3.02067	68.27	6.51979
77	0	1	0	55	1	lymphopro	0	0	0	0	0	0	0	0	1	0	0	1	37.4	0	3.45	1920	1	60	1	1	1.02	40.8	0.98	41.2	0.87	88.8		0	0	0	1	3	0	0	0	0	0	60	1.67	79.08	1.32064	4.66	0.077822
80	0	0	0	81	1	IPF	0	0	0	0	1	0	0	0	0	0	0	0	36.2	0	0.02	844	1	79	0	1	1.98	94.3	1.94	100	1.51	77.8	50.3	0	0	0	0	0	0	0	1	0	0	60	3.14	75.3	2.36442	19.74	0.619836
82	0	0	0	51	0	infection	0	0	0	0	0	1	0	0	0	0	0	0	36.9	0	0.37	439	0	89	0	1	3.67	80	3.67	81.9	3.22	87.7	85.2	0	0	0	1	2	1	1	0	0	0	23.33	4.16	46.79	1.94646	5.34	0.222144
83	0	1	0	84	1	DRUG	0	0	0	0	0	0	0	0	0	0	1	3	36.5	0	5.9	769	1	40	1	1								1	0	0	1	5	1	1	0	0	0	49.33	4.81	15.59	0.749879	2.74	0.131794
84	0	0	0	72	0	IP	0	0	0	1	0	0	0	0	0	0	0	0	36	0	0.05	988	1	74	0	0	3	92.3	2.9	91.5	2.11	72.8	100.1	0	0	0	1	2	0	0	0	0	0	57.33	3.15	36.39	1.14628	63.18	1.99017
86	0	0	0	76	0	HP	0	0	1	0	0	0	0	0	0	0	0	0	36.6	0	0.08	2505	1	67	0	0	2.85	83.3	2.76	83.1	2.44	88.4	60.1	0	0	0	1	4	0	0	1	1	0	32	4.1	32.6	1.3366	65.39	2.68099
87	0	0	0	72	1	IP	0	0	0	1	0	0	0	0	0	0	0	0	36.3	0	0.11	343	0	75	0	0	2.23	97	2.16	100	1.61	74.5	86.8	0	0	0	1	1	0	0	0	1	0	40.67	1.86	95.97	1.78504	2.75	0.05115
89	0	0	0	57	0	CVDIP	0	0	0	0	0	0	0	0	0	1	0	0	36.8	0	0.15	2043	1	71	0	1	3.13	74.2	3.13	76.2	2.64	84.3	44.5	0	0	0	1	5	0	0	0	1	0	64.67	5.51	95.1	5.24001	1.76	0.096976
91	0	0	0	73	0	CVDIP	0	0	0	0	0	0	0	0	0	1	0	0	36.3	0	0.44	543	1	77	0	0	2.6	81.3	2.63	84.3	2.16	82.1	93.4	0	0	0	1	3	0	0	0	0	0	58.67	1.83	82.8	1.51524	7.37	0.134871
92	0	0	0	71	1	CVDIP	0	0	0	0	0	0	0	0	0	1	0	0	35.5	0	0.25	1220	1	66	0	0	1.29	55.1	1.24	56.4	1.05	84.7	57.7	0	0	0	1	5	1	5	0	0	0	19.33	1.57	70.46	1.10622	21.27	0.333939
93	0	0	0	82	0	IP	0	0	0	1	0	0	0	0	0	0	0	0	35.7	0	1.29	453	0	83	0	0	1.86	59.6	1.88	62	1.71	91	107.8	0	0	0	1	1	0	0	0	1	0	64	1.6	87.57	1.40112	3.06	0.04896
94	0	0	0	81	0	OP	0	0	0	0	0	0	0	1	0	0	0	0	36.2	0	0.03	462	0	97	0	0								0	0	0	1	2	0	0	0	1	0	38.67	4.81	21.15	1.01731	78.7	3.78547
95	0	0	0	74	0	CVDIP	0	0	0	0	0	0	0	0	0	1	0	0	36	0	0.03	849	1	89	0	0								0	0	0	0	0	0	0	1	0	1	36	1.22	38.75	0.47275	55.48	0.676856
97	0	0	0	74	1	DRUG	0	0	0	0	0	0	0	0	0	0	1	0	36.6	0	0.08	3629	1	67	0	1	1.77	78.3	1.82	86.3	1.56	85.7	62	1	0	0	1	4	0	0	0	0	0	42	2.75	72.7	1.99925	24.75	0.680625
98	0	0	0	68	0	OP	0	0	0	0	0	0	0	1	0	0	0	0	36.4	0	1.16	600	1	80	0	1	1.54	43.1	1.43	41.1	1.22	85.3	47.6	0	0	0	1	5	0	0	0	0	0	42	10.38	36.7	3.80946	54.33	5.63945
100	0	0	0	79	0	OP	0	0	0	0	0	0	0	1	0	0	0	0	36.6	0	0.34	1582	1	93	0	1	3	94.6	2.9	93.9	1.97	67.9	76.3	0	0	0	1	4	0	0	0	0	0	50	1.52	72.67	1.10458	25.37	0.385624
101	0	1	0	52	0	DRUG	0	0	0	0	0	0	0	0	0	0	1		37.1	0	11.4	2365	1	60	1	1								0	0	0	1	5	0	0	0	0	0	34	15.75	22.84	3.5973	47.3	7.44975
102	0	1	0	73	1	DRUG	0	0	0	0	0	0	0	0	0	0	1	2	36.2	0	3.74	769	1	50	1	1								0	0	0	1	5	0	0	0	0	0	57.33	7.06	28.43	2.00716	68.48	4.83469
103	0	0	0	39	1	IP	0	0	0	1	0	0	0	0	0	0	0	0	36.9	0	1.24	447	0	95	0	0	0.82	26.4	0.82	27.4	0.79	96.3		0	0	0	1	2	0	0	0	0	0	60	1.36	84.26	1.14594	10.23	0.139128
104	0	0	0	70	0	IP	0	0	0	1	0	0	0	0	0	0	0	0	36.2	0	0.02	1744	1	94	0	0	2.62	75.1	2.7	79.4	2.27	84.1	86.7	0	0	0	1	4	0	0	0	0	0	46	2.25	87.6	1.971	10.82	0.24345
105	0	0	0	69	0	IP	0	0	0	1	0	0	0	0	0	0	0	0	36.3	0	0.21	924	1	86	0	0	2	62.5	1.96	62.4	1.49	76	32.7	0	0	0	0	0	0	0	1	1	1	13.33	3.15	83.74	2.63781	6.54	0.20601
106	0	0	0	68	0	IP	0	0	0	1	0	0	0	0	0	0	0		36.8	0	0.19	743	1	61	0	1	1.9	51.5	1.92	53.3	1.64	85.4	45.3	0	0	0	1	3	0	0	1	1	0	19.33	4.82	82.63	3.98277	4.64	0.223648
107	0	1	0	66	0	other	1	0	0	0	0	0	0	0	0	0	0	3	36.8	0	0.05	158	0	57.4	1									0	0	0	1	3	0	0	0	0	0	36.67	2.22	84.19	1.86902	5.94	0.131868
113	0	0	0	69	0	CVDIP	0	0	0	0	0	0	0	0	0	1	0	0	36.5	0	1.68	1020	1	77	0	1	2.32	68.8	2.29	69.6	1.91	83.4	72.3	0	0	0	1	4	0	0	1	1	0	48	4.23	52.35	2.21441	46.6	1.97118
114	0	0	0	53	1	sarcoidosis	0	0	0	0	0	0	1	0	0	0	0	0	36	0	0.19	204	0	82	0	0	2.67	91.8	2.64	95.3	1.89	71.6	86.3	0	0	0	1	2	1	1	0	0	0	66.67	3.9	50.81	1.98159	48.11	1.87629
115	0	0	0	62	1	sarcoidosis	0	0	0	0	0	0	1	0	0	0	0	0	36.5	0	0.17	277	0	73	0	0	3.79	141.4	3.7	145.7	2.76	74.6	88.1	0	0	0	1	3	1	1	0	0	0	47.33	0.75	81.33	0.609975	18.05	0.135375
116	0	0	0	64	1	CVDIP	0	0	0	0	0	0	0	0	0	1	0	0	35.9	0	0.23	728	1	76	0	1	1.18	49.8	1.14	50.9	0.9	78.9		0	0	0	0	0	1	3	0	0	0	44	2.45	49.03	1.20124	40.7	0.99715
117	0	0	0	64	0	DRUG	0	0	0	0	0	0	0	0	0	0	1	0	36.3	0	0.14	758	1	86	0	0	3.76	91.7	3.83	96	3.1	80.9	97.5	1	0	0	1	5	0	0	0	0	0	38	5.21	28.43	1.4812	58.3	3.03743
118	0	0	0	63	1	HP	0	0	1	0	0	0	0	0	0	0	0	1	36.6	0	0.15	2005	1	71	0	1	2.29	87.4	2.3	93.1	1.87	81.3	57.8	0	0	0	1	5	0	0	0	0	0	60	12.04	23.22	2.79569	74.07	8.91803
119	0	0	0	52	1	OP	0	0	0	0	0	0	0	1	0	0	0	0	36.3	0	0.02	278	0	149	0	0								0	0	0	1	3	0	0	0	0	0	62.67	4.04	38.29	1.54692	47.51	1.9194
120	0	0	0	58	0	IP	0	0	0	1	0	0	0	0	0	0	0	0	35.9	0	0.07	631	1	83	0	0	3.45	90.1	3.35	89.3	2.47	73.7	85	0	0	0	1	2	0	0	1	0	1	64.67	4.48	96.21	4.31021	2.82	0.126336
122	0	0	0	77	0	IP	0	0	0	1	0	0	0	0	0	0	0	0	36.6	0	0.19	814	1	60	1	0	2.2	68.5	2.29	73.4	2.1	91.7	94	0	0	0	0	0	1	2	0	1	0	34.67	1.13	92.29	1.04288	6.74	0.076162
123	0	0	0	69	1	CVDIP	0	0	0	0	0	0	0	0	0	1	0		36.7	0	1.24	289	0	89	0	0	1.77	83.9	1.82	91.9	1.54	84.6	84.2	0	0	0	0	0	0	0	1	0	0	55.33	1.53	82.47	1.26179	16.14	0.246942
124	0	0	0	78	0	IP	0	0	0	1	0	0	0	0	0	0	0	0	35.8	0	0.03	202	0	97	0	0	2.46	75.9	2.49	79	1.8	72.3	85.8	0	0	0	0	0	1	1	1	0	0	41.33	1.06	85.35	0.90471	9.34	0.099004
127	0	0	0	72	0	sarcoidosis	0	0	0	0	0	0	1	0	0	0	0	0	35.7	0	0.19	201	0	89	0	0	3.6	104	3.43	101.8	2.42	70.6		0	0	0	1	2	0	0	0	0	1	48	2.62	82.57	2.16333	16.31	0.427322
128	0	0	0	67	0	IP	0	0	0	1	0	0	0	0	0	0	0		36.3	0	0.27	807	1	91	0	1	1.95	62.7	1.83	60	1.66	90.7	58.6	0	0	0	1	5	1	2	1	0	0	38.67	1.18	91.67	1.08171	5.39	0.063602
129	0	0	0	18	1	other	1	0	0	0	0	0	0	0	0	0	0	0	36.9	0	0.09	437	0	102	0	0	2.97	85.6	2.94	87.2	2.72	92.5	72.9	0	0	0	1	5	0	0	0	0	0	44	1.2	59.78	0.71736	39.37	0.47244
130	0	0	0	62	1	lymphopro	0	0	0	0	0	0	0	0	1	0	0	0	35.9	0	0.19	186	0	92	0	0	2.46	85.7	2.42	89	1.97	81.4	106	0	0	0	1	4	0	0	0	0	0	62.67	0.66	91.56	0.604296	7.85	0.05181
131	0	0	0	61	1	IP	0	0	0	1	0	0	0	0	0	0	0	0	36.9	0	0.02	381	0	81	0	0	2.65	101.9	2.61	106.1	2.07	79.3	97.3	0	0	0	0	0	1	2	0	0	0	62	0.8	82.39	0.65912	15.41	0.12328
132	0	0	0	66	1	sarcoidosis	0	0	0	0	0	0	1	0	0	0	0	0	36.4	0	0.15	269	0	78	0	0	2.19	91.3	2.19	96.9	1.54	70.3	113.3	0	0	0	0	0	1	2	0	0	0	13.33	0.66	58.7	0.38742	20.47	0.135102
133	0	0	0	69	1	other	1	0	0	0	0	0	0	0	0	0	0	0	36.1	0	0.1	356	0	67	0	0	2.58	98.5	2.52	102	1.97	78.2	86.6	0	0	0	0	0	1	5	0	0	0	54	0.73	89.9	0.65627	6.99	0.051027
134	0	0	0	53	0	lymphopro	0	0	0	0	0	0	0	0	1	0	0		36	0	0.46	159	0	91	0	0								0	0	0	0	0	1	1	0	0	0
135	0	0	0	78	1	infection	0	0	0	0	0	1	0	0	0	0	0	0	36.4	0	1.76	563	1	70	0	0	1.43	68.1	1.41	72.3	1.07	75.9		1	0	0	0	0	1	4	0	0	0	39.33	6.87	46.89	3.22134	52.73	3.62255
136	0	0	0	61	1	other	1	0	0	0	0	0	0	0	0	0	0	0	36.4	0	0.16			62	0	0	1.69	60.8	1.37	52.1	0.71	51.8		0	0	0	1	2	0	0	0	0	0	29.33	5.07	34.75	1.76182	18.26	0.925782
137	0	0	0	61	0	CVDIP	0	0	0	0	0	0	0	0	0	1	0	0	36	0	0.05	577	1	98	0	0	4.52	105.1	4.62	110.3	3.34	72.3	103	0	0	0	1	2	0	0	0	0	0	56	1.2	93.71	1.12452	2.26	0.02712
138	0	0	0	62	0	IPF	0	0	0	0	1	0	0	0	0	0	0	0	36.6	0	0.06	1547	1	100	0	1	2.79	92.1	2.72	90.7	2.32	85.3	74.2	0	0	0	1	2	0	0	0	0	1	44.67	2.18	94.43	2.05857	3.98	0.086764
139	1	1	0	63	0	CVDIP	0	0	0	0	0	0	0	0	0	1	0	0	36.9	0	7.34	998	1	80	0	1	1.95	52.7	2.01	55.5	1.77	88.1	55.8	0	0	0	1	3	1	2	1	1	1	42	12.42	39.49	4.90466	41.91	5.20522
140	0	1	0	79	1	DRUG	0	0	0	0	0	0	0	0	0	0	1	2	36.8	0	4.7	449	0	60	1	1								0	0	0	1	5	0	0	0	0	0	48	5.93	56.76	3.36587	38.6	2.28898
141	0	0	0	67	0	OP	0	0	0	0	0	0	0	1	0	0	0	0	36.7	0	10.64	167	0	76	0	0	5.02	134.2	4.98	136.8	2.46	49.4	84.4	0	0	0	1	1	1	1	0	0	1	44.67	1.21	78.23	0.946583	18.82	0.227722
142	0	0	0	51	1	infection	0	0	0	0	0	1	0	0	0	0	0	0	35.8	0	6.07	320	0	87	0	0								1	0	0	0	0	1	2	0	0	0	36.67	6.78	50.84	3.44695	5	0.339
144	0	0	0	82	0	IP	0	0	0	1	0	0	0	0	0	0	0	0	36.8	0	2.38	985	1	70	0	0	2.33	81.8	2.17	78.1	1.7	78.3	73.5	0	0	0	1	3	0	0	0	0	0	54.67	3.38	64.86	2.19227	31.02	1.04848
146	0	0	0	74	0	IP	0	0	0	1	0	0	0	0	0	0	0	0	35.7	0	0.22	3717	1	88	0	1	2.25	72.8	2.11	69.9	1.68	79.6	65.2	0	0	0	0	0	1	3	1	1	0	66	3.14	95.16	2.98802	3.12	0.097968
147	0	0	0	63	1	CVDIP	0	0	0	0	0	0	0	0	0	1	0	0	35.9	0	0.25	776	1	88	0	0	2.2	82.1	2.17	85.4	1.64	75.6	83.1	0	0	0	1	2	0	0	0	0	0	45.33	1.23	80.05	0.984615	12.22	0.150306
148	0	0	0	81	0	OP	0	0	0	0	0	0	0	1	0	0	0	0	36.1	0	0.09	771	1	69	0	0	2.27	70.1	2.2	70.1	1.63	74.1	91.8	0	0	0	0	0	1	1	0	0	1	25.33	17.96	58.4	10.4886	36.74	6.5985
151	1	1	0	41	1	EP	0	1	0	0	0	0	0	0	0	0	0	0	37.7	0	15.6	460	0	50	1	1								0	0	0	1	3	1	3	0	0	0	30.67	12.63	11.55	1.45877	50.75	6.40973
152	0	0	0	63	1	IP	0	0	0	1	0	0	0	0	0	0	0	0	36.5	0	0.22	9587	1	113	0	0	2.58	111.7	2.54	116.5	2.05	80.7	76.8	0	0	0	1	2	0	0	0	0	0	44.67	4.1	15.15	0.62115	84.47	3.46327
153	0	0	0	64	0	lymphopro	0	0	0	0	0	0	0	0	1	0	0	0	36.1	0	0.11			104	0	0								0	0	0	1	3	0	0	0	0	0	27.33	2.86	60.4	1.72744	31.9	0.91234
154	0	0	0	65	0	DRUG	0	0	0	0	0	0	0	0	0	0	1	0	35.3	0	0.08	790	1	92	0	0	2.5	60.7	2.41	60.1	1.77	73.4	61.3	0	0	0	1	5	0	0	0	0	0	40	3.52	62.09	2.18557	8.1	0.28512
157	0	0	0	77	1	sarcoidosis	0	0	0	0	0	0	1	0	0	0	0	0	36.6	0	0.04	287	0	93	0	0								0	1	0	1	2	0	0	0	0	0	44.67	1.4	77.6	1.0864	6.73	0.09422
158	0	0	0	71	1	IP	0	0	0	1	0	0	0	0	0	0	0	0	35.8	0	0.31	1253	1	97	0	0	2.74	109.6	2.67	113.6	2.04	76.4	78.9	0	0	0	1	4	0	0	0	0	0	46	1.37	56.76	0.777612	39.33	0.538821
160	0	0	0	73	0	HP	0	0	1	0	0	0	0	0	0	0	0	0	36.5	0	0.19	2472	1	72	0	1	3.17	85.9	3.21	89.7	2.46	76.6	65.6	0	0	0	1	5	0	0	0	0	0	48.67	3.24	28.71	0.930204	66.52	2.15525
161	0	0	0	63	0	CVDIP	0	0	0	0	0	0	0	0	0	1	0	0	36.4	0	1.5	664	1	87	0	1	1.95	52.7	2.01	55.5	1.77	88.1	55.8	0	0	0	1	1	1	3	1	1	1	48	4.52	88.74	4.01105	7.68	0.347136
162	0	0	0	68	0	IP	0	0	0	1	0	0	0	0	0	0	0	0	37	0	0.34	1617	1	90	0	0	3.64	96.8	3.57	97.5	3.18	89.1	56.5	0	0	0	1	5	0	0	0	1	0	36	2.39	95.19	2.27504	1.93	0.046127
163	0	0	0	62	1	IP	0	0	0	1	0	0	0	0	0	0	0	0	36.2	0	0.02	378	0	98	0	0	2.15	85.7	2.13	89.9	1.76	82.6	100	0	0	0	1	3	0	0	0	0	0	45.33	1.48	95.1	1.40748	2.09	0.030932
164	0	0	0	64	0	CVDIP	0	0	0	0	0	0	0	0	0	1	0	0	36.5	0	0.24	1251	1	101	0	1	1.67	51.1	1.63	50.8	1.2	73.6	48.3	0	0	0	1	4	1	1	1	1	0	60	3.33	66.72	2.22178	31.42	1.04629
165	0	0	0	76	1	CVDIP	0	0	0	0	0	0	0	0	0	1	0	0	36.6	0	0.29	658	1	77	0	0	2	85.1	1.96	89.5	1.52	77.6	71.4	0	0	0	1	3	0	0	1	0	0	60.67	3.73	94.3	3.51739	2.5	0.09325
166	0	0	0	79	0	IP	0	0	0	1	0	0	0	0	0	0	0	3	35.4	0	0.92	391	0	111	0	0	2.81	91.2	2.88	96	2.09	72.6	75	0	0	0	1	2	0	0	0	0	0	58	1.75	95.87	1.67773	3	0.0525
168	0	0	0	81	0	IP	0	0	0	1	0	0	0	0	0	0	0	0	36	0	0.06	1080	1	100	0	1	2.06	66.7	1.95	63.1	1.59	81.5	68.9	0	0	0	1	4	0	0	0	1	0	44	1.81	91.09	1.64873	5.57	0.100817
169	0	0	0	62	0	IP	0	0	0	1	0	0	0	0	0	0	0	0	36.3	0	0.28	411	0	81	0	0	3.11	93.4	2.75	82.6	2.15	78.2	91.1	0	0	0	1	4	0	0	0	0	0	56	3.08	94.96	2.92477	3.16	0.097328
171	0	0	0	64	1	CVDIP	0	0	0	0	0	0	0	0	0	1	0		36.2	0	0.05	1877	1	83	0	1	1.59	72.6	1.55	70.8	1.31	84.5	53.6	1	0	0	1	4	0	0	0	0	0	65.33	2.26	87.84	1.98518	9.39	0.212214
172	0	0	0	79	0	CVDIP	0	0	0	0	0	0	0	0	0	1	0	0	36.5	0	0.06	966	1	91	0	0	2.45	79	2.38	76.8	1.91	80.3	84.9	0	0	0	0	0	0	0	1	0	0	26.67	1.31	86.24	1.12974	5.34	0.069954
174	0	0	0	76	1	CVDIP	0	0	0	0	0	0	0	0	0	1	0	0	36.3	0	0.15	1071	1	116	0	1	1.09	49.3	1.05	47.5	0.94	89.5		0	0	0	1	4	0	0	0	1	0	57.33	2.2	96.49	2.12278	0.09	0.00198
175	0	1	0	66	0	EP	0	1	0	0	0	0	0	0	0	0	0	1	36.7	0	15.11	757	1	50	1	1								0	0	0	1	4	1	2	0	0	1	16.67	6.57	5.32	0.349524	55.91	3.67329
176	0	0	0	58	1	IP	0	0	0	1	0	0	0	0	0	0	0	0	36.7	0	0.31	831	1	84	0	0	2.05	84.7	1.96	81	1.68	85.7	57.4	0	0	0	1	3	0	0	0	0	0	66.67	2.12	97.26	2.06191	1.94	0.041128
177	0	0	0	78	1	IP	0	0	0	1	0	0	0	0	0	0	0	1	36.1	0	0.54	1209	1	68	0	1	1.93	87.3	1.74	78.7	1.46	83.9	48.3	0	0	0	1	4	0	0	1	0	1	53.33	3.76	35.72	1.34307	57.27	2.15335
178	0	0	0	65	1	lymphopro	0	0	0	0	0	0	0	0	1	0	0	0	36.5	0	5.74	182	0	72	0	0	2.64	113.8	2.7	116.4	2.21	81.9	75.6	0	0	0	1	5	0	0	0	0	0	60.67	1.21	90.98	1.10086	7.19	0.086999
179	0	0	0	50	1	sarcoidosis	0	0	0	0	0	0	1	0	0	0	0	0	36	0	0.46	301	0	94	0	0	4.09	112.4	4.02	110.4	2.77	68.9	91.2	0	0	0	0	0	1	1	0	0	0	68.67	2.52	68.7	1.73124	28.49	0.717948
180	0	0	0	64	0	sarcoidosis	0	0	0	0	0	0	1	0	0	0	0	0	36.1	0	2.1	160	0	81	0	0								0	0	0	0	0	1	1	0	0	0	56.67	4.66	84.1	3.91906	10.18	0.474388
181	0	0	0	75	1	IP	0	0	0	1	0	0	0	0	0	0	0	0	36.4	0	0.06	417	0	65	0	1	1.65	74.7	1.59	71.9	1.23	77.4	86.5	0	0	0	1	3	0	0	0	0	0	20	1.33	64.67	0.860111	27.56	0.366548
182	0	0	0	54	1	lymphopro	0	0	0	0	0	0	0	0	1	0	0	0	36.7	0	4.01	197	0	85	0	0	3.97	147	3.92	145.2	2.92	74.5	76.9	0	0	0	1	2	0	0	0	0	0	51.33	1.1	88.44	0.97284	8.17	0.08987
183	0	0	0	72	1	sarcoidosis	0	0	0	0	0	0	1	0	0	0	0	0	36.9	0	0.19	125	0	107	0	0	2.84	129.7	2.87	131.1	2.11	73.5		0	0	0	1	1	0	0	0	0	0	54	1.27	90.57	1.15024	1.6	0.02032
184	0	0	0	64	0	IP	0	0	0	1	0	0	0	0	0	0	0	0	36.2	0	0.92	362	0	77	0	1	2.67	81.2	2.61	79.3	2.14	82	98.9	0	0	0	1	4	0	0	0	0	0	36.67	3.7	98.45	3.64265	0.71	0.02627
185	0	0	0	46	0	HP	0	0	1	0	0	0	0	0	0	0	0	0	36.1	0	0.12	1867	1	62	0	1	3	81.5	2.89	78.5	1.99	68.9	75.6	0	0	0	1	5	0	0	0	0	0	62.67	3.7	44.97	1.66389	53.89	1.99393
186	0	0	0	26	0	other	1	0	0	0	0	0	0	0	0	0	0	0	37.2	0	0.2	263	0	129	0	1	2.94	74.4	2.89	73.2	2.33	80.6	66.2	0	0	0	1	4	0	0	0	0	0	48	3.11	97.91	3.045	0.59	0.018349
187	0	0	0	67	0	IP	0	0	0	1	0	0	0	0	0	0	0	0	36	0	0.07	485	0	100	0	0	3.85	106.6	3.86	106.9	2.77	71.8	73.9	0	0	0	1	3	0	0	0	0	1	28	3.08	88.74	2.73319	8.29	0.255332
188	0	0	0	53	0	IP	0	0	0	1	0	0	0	0	0	0	0	0	36.3	0	0.12	1962	1	91	0	1	3.21	88.7	3.08	85.1	2.46	79.9	65.3	0	0	0	1	4	0	0	1	1	0	27.33	4.66	81.9	3.81654	7.91	0.368606
190	0	0	0	62	1	other	1	0	0	0	0	0	0	0	0	0	0	0	36.5	0	0.29	285	0	85	0	0								0	0	0	0	0	1	2	0	1	0	27.33	1.15	35	0.4025	20.44	0.23506
191	0	0	0	60	1	sarcoidosis	0	0	0	0	0	0	1	0	0	0	0	0	36.4	0	0.08	194	0	106	0	0	2.74	112.3	2.72	111.5	2.27	83.5	89.2	0	0	0	1	1	1	1	0	0	0	29.33	3.99	77.76	3.10262	20.74	0.827526
192	0	0	0	80	0	IP	0	0	0	1	0	0	0	0	0	0	0	0	36.3	0	0.02	451	0	79	0	0	2.12	69.5	2.13	69.8	1.98	93	65	0	0	0	0	0	1	2	1	1	1	36	1.56	82.05	1.27998	5.9	0.09204
193	0	0	0	74	1	IP	0	0	0	1	0	0	0	0	0	0	0	0	36.3	0	0.05	621	1	83	0	0	2.31	106.5	2.32	106.9	1.51	65.1	75.1	0	0	0	1	2	0	0	0	0	1	52	1.01	93.7	0.94637	3.33	0.033633
195	0	0	0	64	1	CVDIP	0	0	0	0	0	0	0	0	0	1	0	0	36.6	0	0.23	876	1	87	0	0	2.04	83.6	2	82	1.81	90.5	95.4	0	0	0	1	4	0	0	0	1	0	64.67	1.18	75.09	0.886062	9.35	0.11033
196	1	1	0	70	0	EP	0	1	0	0	0	0	0	0	0	0	0	3	37.6	0	17.39	180	0	50	1	1								0	0	0	0	0	1	5	0	0	0	49.33	2.35	36.93	0.867855	18.69	0.439215
197	0	0	0	68	1	CVDIP	0	0	0	0	0	0	0	0	0	1	0	0	36.3	0	0.59	1349	1	89	0	1	1.38	62.4	1.38	62.4	1.17	84.8	40.1	0	0	0	1	5	0	0	0	0	0	30.67	3.12	85.8	2.67696	3.63	0.113256
198	0	1	0	78	0	lymphopro	0	0	0	0	0	0	0	0	1	0	0	0	37.7	0	9.3	280	0	67	0									1	0	0	1	5	1	2	0	0	1	54.67	5.1	13.9	0.7089	45.73	2.33223
199	0	1	0	52	0	OP	0	0	0	0	0	0	0	1	0	0	0	0	37.5	0	21.9	198	0	50	1	1	2.06	57.2	2.04	56.7	1.81	88.7		0	0	0	1	2	1	5	0	0	0	39.33	2.52	76.23	1.921	6.39	0.161028
200	0	0	0	56	1	OP	0	0	0	0	0	0	0	1	0	0	0		36.5	0	0.03	164	0	104	0	0	2.58	100.8	2.59	101.2	2.19	84.6	93	0	0	0	1	3	0	0	0	0	0	65.33	1.93	80.97	1.56272	17.62	0.340066
201	0	0	0	69	0	IP	0	0	0	1	0	0	0	0	0	0	0	0	36.4	0	0.05	1205	1	100	0	1	3.05	90.2	2.91	86.1	2.35	80.8	65.3	0	0	0	1	4	0	0	0	0	1	40	2.2	83.11	1.82842	6.86	0.15092
202	0	0	0	61	0	OP	0	0	0	0	0	0	0	1	0	0	0	0	36.4	0	1.63	2953	1	82	0	1	3.45	101.5	3.35	98.5	2.31	69		0	0	0	1	2	0	0	0	0	1	36.67	6.76	47.44	3.20694	51.77	3.49965
203	0	0	0	70	1	OP	0	0	0	0	0	0	0	1	0	0	0	2	36.6	0	0.26	2781	1	66	0	1	1.84	84.4	1.69	77.5	1.29	76.3		0	0	0	1	2	1	3	0	0	1	58	3.7	51.12	1.89144	40.94	1.51478
204	0	0	0	57	0	OP	0	0	0	0	0	0	0	1	0	0	0	0	36.7	0	0.17	1698	1	88	0	0	3.76	98.9	3.72	97.9	3.06	82.3	109.3	0	0	0	1	3	1	1	0	0	0	60	3.65	24.08	0.87892	66.59	2.43054
205	0	0	0	60	0	IP	0	0	0	1	0	0	0	0	0	0	0	0	36.3	0	0.79	538	1	98	0	0	3.76	110.6	3.7	108.8	3.02	81.6	102.6	0	0	0	1	2	0	0	0	0	0	56	3.33	87.34	2.90842	8.76	0.291708
206	0	0	0	66	1	CVDIP	0	0	0	0	0	0	0	0	0	1	0	0	36.1	0	0.22	2758	1	94	0	0	1.8	81.4	1.85	83.7	1.42	76.8	50.7	0	0	0	1	4	0	0	0	0	1	60.67	7.46	95.86	7.15116	3.13	0.233498
207	0	0	0	60	0	IP	0	0	0	1	0	0	0	0	0	0	0	0	36.4	0	0.15	1079	1	80	0	0	3.23	97.9	3.08	93.3	2.31	75	69.9	0	0	0	1	4	0	0	0	0	1	51.33	2.75	39.6	1.089	59.46	1.63515
208	0	1	0	58	0	IP	0	0	0	1	0	0	0	0	0	0	0	0	36.5	0	0.14	7341	1	65	0	1	2.71	84.7	2.62	81.9	2.1	80.2	59	0	0	0	1	4	1	2	0	0	0	26.67	8.94	7.39	0.660666	89.98	8.04421
209	0	0	0	33	0	sarcoidosis	0	0	0	0	0	0	1	0	0	0	0	0	36.2	0	0.53	451	0	85	0	0	5.13	119.3	5.08	118.1	3.99	78.5	118.2	0	0	0	1	1	1	1	0	0	0	30	8.71	15.08	1.31347	84.5	7.35995
210	0	0	0	80	0	IP	0	0	0	1	0	0	0	0	0	0	0	0	35.6	0	0.07	1081	1	68	0	1	2.67	87.8	2.7	88.8	2.03	75.2	60.5	0	0	0	1	4	0	0	1	0	1	22.67	3.71	75.79	2.81181	4.65	0.172515
211	0	0	0	70	1	sarcoidosis	0	0	0	0	0	0	1	0	0	0	0	0	36.4	0	0.11			71	0	0	1.86	83.4	1.83	82.1	1.48	80.9	61.3	0	0	0	0	0	1	2	0	0	0	36	1.1	84.55	0.93005	14.36	0.15796
212	0	0	0	66	0	CVDIP	0	0	0	0	0	0	0	0	0	1	0	0	35.5	0	0.58	247	0	87	0	0	4.7	133.5	4.82	136.9	3	62.2	113.8	0	0	0	1	2	0	0	0	0	1	44	4.34	94.58	4.10477	0.04	0.001736
213	0	0	0	50	0	HP	0	0	1	0	0	0	0	0	0	0	0	0	36.9	0	0.25	828	1	75	0	1	3.77	100	3.73	98.9	2.19	58.7	97.9	0	0	0	1	3	0	0	0	0	1	52.67	12.32	14.46	1.78147	64.54	7.95133
215	0	0	0	24	0	sarcoidosis	0	0	0	0	0	0	1	0	0	0	0	0	37.4	0	0.02	151	0	89	0	0	5.44	124.5	5.53	126.5	4.56	82.5	136.3	0	0	0	1	3	0	0	0	0	1	62	2.91	94.74	2.75693	4.94	0.143754
216	0	0	0	72	0	IP	0	0	0	1	0	0	0	0	0	0	0	0	35.6	0	0.09	599	1	93	0	0	3.13	92.6	3.13	92.6	2.61	83.4	97.6	0	0	0	1	3	0	0	0	0	0	52.67	1.43	95.12	1.36022	3.28	0.046904
217	0	0	0	68	1	infection	0	0	0	0	0	1	0	0	0	0	0	0	36	0	0.29	527	1	64	0	0	2.37	102.6	2.51	108.7	2.03	80.9	94	0	0	0	1	3	0	0	0	1	0	68	1.43	85.07	1.2165	6.93	0.099099
218	0	0	0	80	0	DRUG	0	0	0	0	0	0	0	0	0	0	1	0	35.9	0	0.09	368	0	87	0	0	3.2	96.4	3	90.4	2.27	75.7	95.2	0	0	0	1	3	0	0	0	0	1	38	2.17	85.64	1.85839	3.59	0.077903
219	0	0	0	71	0	IP	0	0	0	1	0	0	0	0	0	0	0	0	36.7	0	0.06	2213	1	65	0	0	3.19	100.9	3.07	97.2	2.57	83.7	85.4	0	0	0	1	4	0	0	0	0	1	37.33	1.47	81.36	1.19599	15.97	0.234759
220	0	0	0	72	0	IPF	0	0	0	0	1	0	0	0	0	0	0	0	36.6	0	0.18	653	1	100	0	1	1.71	53.9	1.72	54.3	1.72	100	70.4	0	0	0	1	3	0	0	1	1	1	51.33	2.49	73.97	1.84185	19.14	0.476586
221	0	0	0	32	1	OP	0	0	0	0	0	0	0	1	0	0	0	0	37	0	1	140	0	87	0	0	3.85	124.2	3.8	122.6	2.82	74.2	82.1	0	0	0	1	1	1	1	0	0	0	38.67	3.8	78.65	2.9887	20.55	0.7809
222	0	0	0	74	1	infection	0	0	0	0	0	1	0	0	0	0	0	0	37	0	0.29	350	0	84	0	0	2.73	116.7	2.74	117.1	2.01	73.4		0	0	0	1	4	0	0	0	1	0	36	7.65	31.12	2.38068	10.63	0.813195
223	0	0	0	68	1	infection	0	0	0	0	0	1	0	0	0	0	0	2	35.9	0	5.63	235	0	62	0	0								1	0	0	1	5	0	0	0	0	0	43.33	1.96	42.27	0.828492	17.61	0.345156
224	0	0	0	67	0	other	1	0	0	0	0	0	0	0	0	0	0	0	36.6	0	0.53	403	0	91	0	0	3.04	95.3	3	94	2.4	80		0	0	0	1	2	1	1	0	0	1	19.33	0.91	96.87	0.881517	1.63	0.014833
226	0	0	0	34	0	sarcoidosis	0	0	0	0	0	0	1	0	0	0	0	0	36.6	0	0.07	166	0	93	0	0	4.7	114.1	4.72	114.6	3.49	73.9	127.6	0	0	0	1	4	0	0	0	0	0	43.33	3.82	97.55	3.72641	1.01	0.038582
227	0	0	0	74	1	CVDIP	0	0	0	0	0	0	0	0	0	1	0	0	36.6	0	0.02	1902	1	81	0	1	1.55	75.2	1.48	71.8	1.23	83.1	66.1	0	0	0	1	4	0	0	0	0	0	24	4.48	42.25	1.8928	56.41	2.52717
228	0	0	0	66	1	EP	0	1	0	0	0	0	0	0	0	0	0		36.3	0	0.03	124	0	72	0	0	2.31	97.9	2.05	86.9	1.28	62.4	129.3	0	0	0	1	2	0	0	0	0	0	54	2.06	90.24	1.85894	4.45	0.09167
229	0	0	0	62	1	EP	0	1	0	0	0	0	0	0	0	0	0	0	38.5	1	9.9	311	0	72	0	0	2.73	117.2	2.73	117.2	2	73.3	97.4	0	0	0	1	2	1	3	0	0	0	48	9.03	45.42	4.10143	3.31	0.298893
230	0	0	0	74	0	CVDIP	0	0	0	0	0	0	0	0	0	1	0	0	36.9	0	6.69	371	0	57	1	0	3.81	111.4	3.81	111.4	2.79	73.2	103.4	0	0	0	1	2	1	2	0	1	0	56.67	4.04	73.05	2.95122	19.73	0.797092
231	0	0	0	71	1	IP	0	0	0	1	0	0	0	0	0	0	0	0	36.7	0	0.76	2830	1	70	0	1	1.03	46.4	0.93	41.9	0.8	86		0	0	0	1	4	0	0	0	1	0	28	2.35	66.39	1.56017	11.71	0.275185
232	0	0	0	81	1	sarcoidosis	0	0	0	0	0	0	1	0	0	0	0	0	36.5	0	0.17	383	0	84	0	0	1.84	83.3	1.78	80.5	1.16	65.2	100.5	0	0	0	1	3	0	0	0	0	0	46.67	2.97	80.8	2.39976	15.34	0.455598
235	0	0	0	58	0	IP	0	0	0	1	0	0	0	0	0	0	0	0	36.6	0	0.28	1073	1	83	0	0	2.78	79.2	2.85	81.2	2.42	84.9	75.3	0	0	0	1	4	0	0	1	0	1	36.67	5.8	94.31	5.46998	3.95	0.2291
236	1	0	1	84	0	other	1	0	0	0	0	0	0	0	0	0	0	0	36.9	0	3.19	292	0	83	0	1	2.62	84.8	2.62	84.8	2.17	82.8	84.5	0	0	0	1	4	1	2	0	1	1	30	6.61	26.16	1.72918	40.06	2.64797
237	0	0	0	19	1	other	1	0	0	0	0	0	0	0	0	0	0	0	36.5	0	0.03	302	0	83	0	1	2.16	70.6	2.07	67.6	1.68	81.2	87.8	0	0	0	1	3	0	0	0	0	0	11.33	0.95	34.3	0.32585	27.4	0.2603
238	0	0	0	77	0	infection	0	0	0	0	0	1	0	0	0	0	0	0	37.6	0	16.66	271	0	65	0	0								0	0	0	1	3	1	3	0	0	1	30	0.27	78.39	0.211653	19.29	0.052083
239	0	0	0	82	0	IPF	0	0	0	0	1	0	0	0	0	0	0	0	36.8	0	0.12	248	0	90	0	1	1.96	60.1	2.18	66.9	1.69	77.5		0	0	0	1	2	0	0	1	1	0	18	1.7	88	1.496	6.3	0.1071
240	0	0	0	68	1	sarcoidosis	0	0	0	0	0	0	1	0	0	0	0	0	36.2	0	0.24	438	0	94	0	0								0	0	0	1	3	0	0	0	0	0	63.33	2.19	87.86	1.92413	8.63	0.188997
241	0	0	0	35	1	CVDIP	0	0	0	0	0	0	0	0	0	1	0	0	37	0	1.15	2009	1	88	0	0								0	0	0	1	4	0	0	0	0	0	47.33	5.03	54.89	2.76097	23.1	1.16193
242	0	0	0	85	1	sarcoidosis	0	0	0	0	0	0	1	0	0	0	0	0	37	0	0.35	779	1	76	0	0								0	0	0	1	5	0	0	0	0	0	45.33	1.59	46.97	0.746823	52.18	0.829662
243	0	0	0	64	1	CVDIP	0	0	0	0	0	0	0	0	0	1	0	0	37.3	0	12.33	450	0	80	0	1	2.25	94.9	2.3	97	1.68	73	113.6	0	0	0	1	3	1	2	0	1	0	32	9.56	14.05	1.34318	16.07	1.53629
244	0	0	0	78	1	sarcoidosis	0	0	0	0	0	0	1	0	0	0	0	0	36.1	0	0.03	274	0	71	0	0	1.93	92.3	1.94	92.8	1.45	74.7	94.6	0	0	0	0	0	0	0	1	0	0	46.67	0.45	85.59	0.385155	13.24	0.05958
245	0	0	0	65	0	infection	0	0	0	0	0	1	0	0	0	0	0	0	36.2	0	0.35	163	0	94	0	0	2.83	83.7	2.61	77.2	1.89	72.4		0	0	0	1	1	0	0	0	0	0	44	3.35	90.9	3.04515	7.51	0.251585
246	0	0	0	75	0	CVDIP	0	0	0	0	0	0	0	0	0	1	0	0	35.6	0	0.03	682	1	106	0	0	1.97	65.9	2.03	67.9	1.23	60.6	81.5	0	0	0	1	1	0	0	1	1	0	22	1.51	92.14	1.39131	7.2	0.10872
247	0	0	0	77	0	OP	0	0	0	0	0	0	0	1	0	0	0	0	36	0	11.25	274	0	88	0	0	2.36	74.2	2.18	68.6	1.71	78.4	83.1	0	0	0	1	1	1	1	0	0	0	50	1.01	77.77	0.785477	20.52	0.207252
248	0	0	0	44	0	HP	0	0	1	0	0	0	0	0	0	0	0	0	36.8	0	0.5	861	1	95	0	1	3.75	95.4	3.52	89.6	3.01	85.5	60.7	1	0	0	1	3	0	0	0	0	1	46.67	2.79	96.47	2.69151	1.22	0.034038
249	0	0	0	71	1	IP	0	0	0	1	0	0	0	0	0	0	0	2	36.2	0	1.06	4362	1	73	0	0	1.72	74.5	1.63	70.6	1.42	87.1	66.6	0	0	0	1	4	1	1	0	0	0	75.33	2.23	73.8	1.64574	23.45	0.522935
250	0	0	0	26	1	other	1	0	0	0	0	0	0	0	0	0	0	0	36.3	0	1.04	381	0	102	0	0								0	0	0	1	1	1	3	0	1	0	56.67	3.21	57.24	1.8374	37.61	1.20728
251	0	0	0	32	0	sarcoidosis	0	0	0	0	0	0	1	0	0	0	0	0	36.3	0	0.18	689	1	81	0	0	3.4	81.7	3.46	83.2	2.65	76.6	83.2	0	0	0	1	5	0	0	0	0	0	66	3.8	77.15	2.9317	22.79	0.86602
252	0	0	0	58	0	OP	0	0	0	0	0	0	0	1	0	0	0	0	36.4	0	5.3	348	0	78	0	0	2.56	75.3	2.61	76.8	1.67	64		0	0	0	1	1	1	3	0	0	0	59.33	4.26	71.32	3.03823	28.44	1.21154
253	0	0	0	63	0	OP	0	0	0	0	0	0	0	1	0	0	0	0	36.5	0	1.4	2367	1	63	0	1	2.41	75.1	2.35	73.2	1.86	79.1	63.6	0	0	0	1	4	0	0	0	0	0	46.67	8.89	16.61	1.47663	74.85	6.65417
254	0	0	0	76	1	sarcoidosis	0	0	0	0	0	0	1	0	0	0	0	0	36.2	0	0.12	232	0	83	0	0	1.57	70.7	1.44	64.9	1.06	73.6		0	0	0	1	4	0	0	0	0	0	11.33	1.61	75.88	1.22167	22.48	0.361928
255	0	0	0	61	1	sarcoidosis	0	0	0	0	0	0	1	0	0	0	0	0	36.5	0	0.7	339	0	67	0	0	2.3	98.3	1.92	82.1	0.78	40.6	91.3	0	0	0	1	4	0	0	0	0	0	13.33	0.73	62.98	0.459754	16.88	0.123224
256	0	0	0	55	1	CVDIP	0	0	0	0	0	0	0	0	0	1	0	0	37	0	0.98	800	1	79	0	1	1.22	50.2	1.25	51.4	0.93	74.4	47.7	0	0	0	1	2	0	0	0	1	0	42	2.04	85.6	1.74624	6.8	0.13872
257	0	0	0	71	1	CVDIP	0	0	0	0	0	0	0	0	0	1	0	0	35.7	0	0.08	591	1	101	0	0	1.94	82.6	1.97	83.8	1.73	87.8	66.7	0	0	0	1	3	0	0	0	1	1	58	3.3	75.23	2.48259	25.78	0.85074
258	0	0	0	65	1	other	1	0	0	0	0	0	0	0	0	0	0	0	36.9	0	0.16	327	0	85	0	0	2.37	105.8	2.37	105.8	2.08	87.8		0	0	0	1	3	1	1	0	0	0	16.67	8.43	5.18	0.436674	3.41	0.287463
259	0	0	0	63	0	lymphopro	0	0	0	0	0	0	0	0	1	0	0	0	35.6	0	0.48	476	0	96	0	0	3.32	96.2	3.48	100.9	2.9	83.3	67.6	0	0	0	1	4	0	0	0	0	1	51.33	5.05	74.58	3.76629	8.66	0.43733
260	0	0	0	74	1	IP	0	0	0	1	0	0	0	0	0	0	0	0	36.6	0	0.06	548	1	94	0	0	2.58	119.4	2.62	121.3	2.26	86.3	118.6	0	0	0	1	4	0	0	0	0	0	27.33	2.15	87.87	1.88921	5.22	0.11223
261	0	0	0	45	0	EP	0	1	0	0	0	0	0	0	0	0	0	0	36.7	0	0.64	130	0	82	0	0	3.58	98.4	3.4	93.4	2.12	62.4	108	0	0	0	0	0	1	1	0	0	0	55.33	10.09	13.38	1.35004	1.48	0.149332
262	0	0	0	40	1	sarcoidosis	0	0	0	0	0	0	1	0	0	0	0	0	36.7	0	0.26	303	0	104	0	0	2.92	106.2	2.82	102.5	2.2	78	103.1	0	0	0	1	4	0	0	0	0	0	64	4.17	54.73	2.28224	44.75	1.86607
263	0	0	0	79	1	other	1	0	0	0	0	0	0	0	0	0	0	0	36.5	0	0.1	262	0	91	0	0								0	0	0	1	2	0	0	0	0	0	56	1.2	94.95	1.1394	1.44	0.01728
265	0	0	0	43	0	HP	0	0	1	0	0	0	0	0	0	0	0	0	36.8	0	7.09	229	0	64	0	0	2.85	73.8	2.72	70.5	2.26	83.1		0	0	0	1	5	0	0	0	0	0	41.33	3.23	29.43	0.950589	53	1.7119
266	0	0	0	75	0	IP	0	0	0	1	0	0	0	0	0	0	0	0	36	0	0.4	1478	1	91	0	0	1.65	51.7	1.73	54.2	1.4	80.9	91.3	0	0	0	1	4	0	0	0	1	0	26.67	2.02	84.31	1.70306	7.43	0.150086
267	0	0	0	72	1	IP	0	0	0	1	0	0	0	0	0	0	0	0	35.6	0	0.1	988	1	82	0	0	2.26	95.4	2.31	97.5	2.27	98.3	66.4	0	0	0	1	5	0	0	0	1	0	66.67	2.66	90.07	2.39586	6.56	0.174496
268	0	0	0	80	0	IP	0	0	0	1	0	0	0	0	0	0	0		35.9	0	0.2	1408	1	77	0	1	2.68	81.5	2.69	81.8	2.11	78.4	41.6	1	0	0	1	2	1	1	1	1	1	44	2.21	71.9	1.58899	14.9	0.32929
269	0	0	0	81	1	HP	0	0	1	0	0	0	0	0	0	0	0	0	36.9	0	0.53	748	1	94	0	0	2.59	117.7	2.64	120	1.96	74.2	72.7	0	0	0	1	3	1	1	0	1	0	46.67	0.86	87.6	0.75336	6.81	0.058566
270	0	1	0	29	0	other	1	0	0	0	0	0	0	0	0	0	0	3	36.8	0	0.68	224	0	104	0		3.57	87.7	2.95	72.5	1.52	51.5	107.7	0	0	0	1	1	0	0	0	0	0	44.67	0.66	78.11	0.515526	2.19	0.014454
271	0	0	0	50	0	other	1	0	0	0	0	0	0	0	0	0	0	0	36.7	0	0.03	380	0	82	0	0	3.85	104.1	3.78	102.2	2.87	75.9	101.5	0	0	0	1	3	0	0	0	0	0	48	2.31	76.65	1.77062	21.18	0.489258
272	0	0	0	67	1	IP	0	0	0	1	0	0	0	0	0	0	0	0	36.6	0	0.2	1630	1	70	0	1	1.87	77.3	1.86	76.9	1.72	92.5	46.7	0	0	0	1	4	0	0	0	1	0	15.33	3.37	76.32	2.57198	0	0
274	0	0	0	25	1	sarcoidosis	0	0	0	0	0	0	1	0	0	0	0	0	36.2	0	0.01			102	0	0	3.56	121.1	3.66	124.5	2.75	75.1	93.8	0	0	0	1	4	0	0	0	0	0	66.67	1.73	64.31	1.11256	34.99	0.605327
275	0	0	0	50	1	OP	0	0	0	0	0	0	0	1	0	0	0	0	36.6	0	0.02	338	0	132	0	0								0	0	0	1	2	1	2	0	0	0	32.67	1.22	91.49	1.11618	6.74	0.082228
276	0	0	0	75	1	HP	0	0	1	0	0	0	0	0	0	0	0	0	36.2	0	0.24	781	1	58	1	1	1.73	73.9	1.66	70.9	1.32	79.5	52.5	0	0	0	1	5	1	1	0	1	0	26.67	1.37	84.83	1.16217	4.75	0.065075
277	0	0	0	82	1	CVDIP	0	0	0	0	0	0	0	0	0	1	0	0	36	0	0.23	449	0	82	0	0	1.63	71.8	1.51	66.5	1.28	84.8		0	0	0	1	3	0	0	0	1	0	38.67	2.21	91.23	2.01618	6.06	0.133926
278	0	0	0	67	0	IP	0	0	0	1	0	0	0	0	0	0	0	0	36.3	0	3.23	687	1	89	0	0								0	0	0	1	1	1	3	0	0	0	9.33	7.36	23	1.6928	57	4.1952
279	0	0	0	55	1	HP	0	0	1	0	0	0	0	0	0	0	0	0	35.9	0	0.07	7015	1	60	1	1	2.19	87.3	2.19	87.3	1.83	83.6	57.1	0	0	0	1	5	0	0	0	0	0	48	12.49	8.93	1.11536	88.47	11.0499
280	0	0	0	68	0	sarcoidosis	0	0	0	0	0	0	1	0	0	0	0	0	36.9	0	0.23	600	1	97	0	1	2.5	75.8	2.47	74.8	2.37	96	77.4	0	0	0	1	4	0	0	1	1	1	59.33	3.01	58.54	1.76205	34.98	1.0529
281	0	0	0	70	1	IP	0	0	0	1	0	0	0	0	0	0	0	0	36.8	0	0.15	617	1	96	0	0	2.49	118	2.49	118	2.06	82.7	116.4	0	0	0	1	3	1	1	0	0	0	48.67	1.03	93.04	0.958312	5.42	0.055826
282	0	0	0	73	0	CVDIP	0	0	0	0	0	0	0	0	0	1	0	0	36.3	0	2.36	2446	1	79	0	0	2.45	77.5	2.41	76.3	1.9	78.8	98.6	0	0	0	1	3	0	0	0	0	1	31.33	7.14	48.1	3.43434	48.14	3.4372
283	0	0	0	62	0	IP	0	0	0	1	0	0	0	0	0	0	0	0	37	0	0.14	863	1	71	0	0	3.34	100.3	3.3	99.1	2.13	64.5	100.1	0	0	0	1	2	0	0	0	0	0	40.67	10.87	24.16	2.62619	75.09	8.16228
284	0	0	0	53	1	sarcoidosis	0	0	0	0	0	0	1	0	0	0	0	0	36.2	0	0.07	444	0	90	0	1								0	0	0	1	4	0	0	0	0	0	58	1.29	68.73	0.886617	30.99	0.399771
285	0	0	0	24	0	sarcoidosis	0	0	0	0	0	0	1	0	0	0	0	0	37.2	0	0.1	362	0	94	0	0	4.49	103	4.42	101.4	3.67	83	105.7	0	0	0	1	5	0	0	0	0	0	60	4.35	80.99	3.52306	16.78	0.72993
286	0	0	0	73	0	IP	0	0	0	1	0	0	0	0	0	0	0	0	36.3	0	0.03	412	0	77	0	0	4.46	127.4	4.39	125.4	3.24	73.8	102.2	0	0	0	1	2	0	0	1	0	1	38.67	5.07	95.62	4.84793	1.34	0.067938
287	0	0	0	59	0	other	1	0	0	0	0	0	0	0	0	0	0	0	36.8	0	2.21	220	0	95	0	0	1.91	56.3	1.84	54.3	1.84	100	80.5	1	0	0	1	5	0	0	0	1	0	29.33	1.97	88.46	1.74266	9.65	0.190105
288	0	0	0	50	0	other	1	0	0	0	0	0	0	0	0	0	0	0	36.6	0	0.36	143	0	81	0	0	5.01	129.8	5.11	132.4	3.45	67.5	127.3	0	0	0	0	0	1	1	0	0	1	32	1.51	97.15	1.46697	1.85	0.027935
289	0	0	0	69	0	IP	0	0	0	1	0	0	0	0	0	0	0	0	36.1	0	0.16	456	0	66	0	1	1.71	52.5	1.64	50.3	0.87	53		0	0	0	1	4	0	0	0	0	0	52	1.97	71.49	1.40835	26.88	0.529536
290	0	0	0	80	1	sarcoidosis	0	0	0	0	0	0	1	0	0	0	0	0	36.7	0	0.32	505	1	76	0	0								0	0	0	1	3	0	0	0	0	0	52	1.18	93.48	1.10306	4.97	0.058646
291	0	0	0	66	0	IP	0	0	0	1	0	0	0	0	0	0	0	0	35.4	0	0.05	1404	1	85	0	0	3.23	93.9	3.24	94.2	2.54	78.4	82.3	0	0	0	1	2	1	2	0	0	0	37.33	2.99	93.38	2.79206	5.63	0.168337
292	0	0	0	67	1	other	1	0	0	0	0	0	0	0	0	0	0	0	36.1	0	0.04	286	0	93	0	0	2.19	95.2	2.11	91.7	1.44	68.2		1	1	0	1	3	1	2	0	0	0	47.33	1.04	95.94	0.997776	2.99	0.031096
294	0	1	0	64	0	DRUG	0	0	0	0	0	0	0	0	0	0	1		39.3	1	10.6	174	0	58	1	1								0	0	0	1	3	0	0	0	0	0	37.33	10.16	40.6	4.12496	39.47	4.01015
295	0	0	0	70	0	IP	0	0	0	1	0	0	0	0	0	0	0	0	35.9	0	0.08	994	1	81	0	0	3.18	99.4	3.23	100.9	2.21	68.4	112.5	0	0	0	1	2	0	0	0	0	0	34.67	2.56	14.41	0.368896	83.33	2.13325
296	0	0	0	85	0	EP	0	1	0	0	0	0	0	0	0	0	0	0	36.1	0	2.58	485	0	73	0	1	2.22	70.7	2.24	71.3	1.75	78.1		0	0	0	1	1	1	3	0	0	0	42	4.24	59.27	2.51305	10.82	0.458768
297	0	0	0	75	0	other	1	0	0	0	0	0	0	0	0	0	0	2	35.9	0	2.29	320	0	82	0	0	3.2	100.9	3.11	98.1	2.63	84.6	92.6	0	0	0	1	4	0	0	0	1	0	33.33	3.06	88.6	2.71116	4.8	0.14688
298	0	0	0	23	0	sarcoidosis	0	0	0	0	0	0	1	0	0	0	0	0	36.7	0	0.06			92	0	0	4.22	101.4	4.19	100.7	3.92	93.6	104.6	0	0	0	1	4	0	0	0	0	0	52	1.55	45.23	0.701065	53.71	0.832505
299	0	0	0	51	1	sarcoidosis	0	0	0	0	0	0	1	0	0	0	0	0	36.8	0	0.17	232	0	93	0	0	3.32	121.2	3.27	119.3	2.43	74.3	92.6	0	0	0	1	4	0	0	0	0	0	54	2.94	46.74	1.37416	46.02	1.35299
300	0	0	0	60	0	sarcoidosis	0	0	0	0	0	0	1	0	0	0	0	0	36.1	0	0.11	1576	1	73	0	1	2.02	57.7	2.03	58	1.67	82.3	53.5	0	0	0	1	5	0	0	0	0	0	44	6.02	28.62	1.72292	69.66	4.19353
301	0	0	0	69	1	HP	0	0	1	0	0	0	0	0	0	0	0	0	35.9	0	0.06	278	0	82	0	0	2.03	98.1	2.03	98.1	1.73	85.2	88.7	0	0	0	1	2	0	0	1	0	0	22	1.3	90.62	1.17806	3.41	0.04433
302	0	0	0	67	1	IP	0	0	0	1	0	0	0	0	0	0	0	0	36.9	0	0.02	400	0	92	0	1	2.03	87.1	1.98	85	1.84	92.9		0	0	0	1	4	0	0	0	0	0	41.33	2.37	93.44	2.21453	3.88	0.091956
303	0	0	0	75	1	OP	0	0	0	0	0	0	0	1	0	0	0	0	36.4	0	2.5	381	0	79	0	0	2.24	103.2	2.29	105.5	1.83	79.9	102.4	1	1	0	1	2	0	0	0	0	0	40	2.78	94.35	2.62293	1.32	0.036696
304	0	0	0	78	0	HP	0	0	1	0	0	0	0	0	0	0	0	0	36.5	0	0.09	3496	1	72	0	1	2.89	90.9	2.77	87.1	1.92	69.3	56.4	0	0	0	1	4	0	0	0	1	0	44	8.24	19.56	1.61174	74.64	6.15034
305	0	0	0	79	1	other	1	0	0	0	0	0	0	0	0	0	0	0	36.4	0	3.36	850	1	71	0	0	1.65	72.4	1.76	77.2	1.52	86.4	100.3	0	0	0	1	3	1	2	0	1	0	28	19.53	1.64	0.320292	6.32	1.2343
306	1	1	0	65	1	CVDIP	0	0	0	0	0	0	0	0	0	1	0	0	36.1	0	1.46	805	1	59	1	1	2.49	101.2	2.4	97.6	1.81	75.4		0	0	0	1	4	1	2	0	0	0	47.33	4.61	31.55	1.45446	63.43	2.92412
307	0	0	0	49	0	DRUG	0	0	0	0	0	0	0	0	0	0	1		36.6	0	2	205	0	89	0	0								0	0	0	1	2	0	0	0	0	0	44	0.88	48.67	0.428296	26.02	0.228976
308	0	1	0	86	1	HP	0	0	1	0	0	0	0	0	0	0	0	0	37	0	2.47	1421	1	67	0	1	1.27	59.6	1.3	61	1.07	82.3		0	0	0	1	5	0	0	0	0	0	38	3.52	44.04	1.55021	39.5	1.3904
309	0	0	0	66	1	CVDIP	0	0	0	0	0	0	0	0	0	1	0	0	36.3	0	0.59	270	0	69	0	0								0	0	0	1	3	0	0	0	1	0	49.33	4.31	89.81	3.87081	7.4	0.31894
311	0	0	0	77	1	IP	0	0	0	1	0	0	0	0	0	0	0	0	36.7	0	0.18	491	0	108	0	1	2.76	118.5	2.71	116.3	2.17	80.1	65.5	0	0	0	1	4	0	0	0	1	0	54.67	1.29	87.09	1.12346	10.25	0.132225
312	0	0	0	68	0	CVDIP	0	0	0	0	0	0	0	0	0	1	0	0	36.7	0	0.44	1201	1	81	0	0	2.55	77	2.54	76.7	2.09	82.3	66.9	0	0	0	1	1	0	0	1	0	1	31.33	1.84	87.48	1.60963	9.76	0.179584
313	0	0	0	52	1	OP	0	0	0	0	0	0	0	1	0	0	0	0	37.1	0	0.22	349	0	94	0	1	2.73	105.4	2.73	105.4	2.13	78	89.6	0	0	0	1	2	1	1	0	0	0	54.67	5.93	12.97	0.769121	85.96	5.09743
314	0	0	0	70	0	IP	0	0	0	1	0	0	0	0	0	0	0	0	36.4	0	0.12	303	0	59	1	0	1.29	40.6	1.2	37.7	0.85	70.8		0	0	0	0	0	1	1	1	0	0	22	2.36	89.05	2.10158	3.3	0.07788
315	0	0	0	39	1	other	1	0	0	0	0	0	0	0	0	0	0		36.9	0	0.03	407	0	92	0	1	3.22	114.2	3.32	117.7	2.83	85.2	92.5	0	0	0	1	3	0	0	0	0	0	47.33	2.34	97.84	2.28946	0.64	0.014976
317	0	0	0	64	1	CVDIP	0	0	0	0	0	0	0	0	0	1	0	2	35.4	0	0.07	4632	1	61	0	1								0	0	0	1	3	0	0	0	0	0	28	6.07	40.54	2.46078	46.86	2.8444
318	0	0	0	56	1	sarcoidosis	0	0	0	0	0	0	1	0	0	0	0	0	35.9	0	0.14	134	0	104	0	0	3.14	125.6	3.21	128.4	2.6	81	91.2	0	0	0	1	1	0	0	0	0	0	28.67	0.8	54.53	0.43624	43.84	0.35072
319	0	0	0	74	0	CVDIP	0	0	0	0	0	0	0	0	0	1	0	0	36.5	0	0.14	463	0	86	0	1	2.73	81.3	2.68	79.8	2.15	80.2	77.9	0	0	0	1	3	0	0	0	1	1	39.33	7.48	94.12	7.04018	1.48	0.110704
320	0	0	0	57	1	IP	0	0	0	1	0	0	0	0	0	0	0	0	36.4	0	0.3	254	0	103	0	1	2.19	90.5	2.2	90.9	1.98	90	91.8	0	0	0	0	0	1	2	0	1	0	35.33	1.95	91.56	1.78542	2.3	0.04485
322	0	0	0	72	0	lymphopro	0	0	0	0	0	0	0	0	1	0	0	0	36.3	0	6.99	257	0	65	0	1								0	0	0	1	2	1	2	0	0	0	26	3.1	78.85	2.44435	19.01	0.58931
323	0	0	0	67	0	IP	0	0	0	1	0	0	0	0	0	0	0	0	36.4	0	0.1	1112	1	80	0	1	2.21	64.8	2.09	61.3	1.77	84.7	72	0	0	0	1	5	0	0	0	0	1	18	3.65	87.59	3.19704	6	0.219
324	0	0	0	79	0	CVDIP	0	0	0	0	0	0	0	0	0	1	0	0	36.7	0	0.13	1070	1	105	0	0	3.11	100.3	3.11	100.3	2.4	77.2	89	0	0	0	1	2	0	0	0	1	1	28.67	2.91	78.57	2.28639	5.23	0.152193
325	0	0	0	71	1	other	1	0	0	0	0	0	0	0	0	0	0	0	36.4	0	0.02	211	0	82	0	0	2.12	96.8	2.15	98.2	1.55	72.1	107.8	0	0	0	1	3	0	0	0	0	0	42.67	1.53	49.8	0.76194	48.13	0.736389
326	0	0	0	65	0	IP	0	0	0	1	0	0	0	0	0	0	0	0	36.5	0	0.6	12385	1	63	0	1	2.89	85	2.73	80.3	2.41	88.3	64.4	0	0	0	1	5	0	0	0	0	0	46	14.11	15.31	2.16024	83.58	11.7931
327	0	0	0	64	0	IP	0	0	0	1	0	0	0	0	0	0	0	0	36.6	0	0.22	2409	1	92	0	0	3.46	101.2	3.47	101.5	2.83	81.6	74.1	0	0	0	1	4	1	1	1	1	0	46	5.04	58.58	2.95243	40.18	2.02507
328	0	0	0	79	0	IP	0	0	0	1	0	0	0	0	0	0	0	0	36.3	0	0.07	986	1	75	0	0	2.7	84.9	2.35	73.9	1.95	83	84.1	0	0	0	1	2	0	0	0	1	0	48	3.56	45.98	1.63689	50.6	1.80136
329	0	0	0	72	0	IP	0	0	0	1	0	0	0	0	0	0	0	0	36.5	0	0.09	2016	1	92	0	1	2.86	87.2	2.83	86.3	2.19	77.4	80.8	0	0	0	0	0	0	0	1	0	1	30.67	1.56	93.99	1.46624	1.02	0.015912
330	0	0	0	69	1	OP	0	0	0	0	0	0	0	1	0	0	0	0	37	0	6.7	997	1	62	0	0	1.93	84.6	1.84	80.7	1.4	76.1	58.4	0	0	0	0	0	1	4	0	0	1	42	3.33	88.67	2.95271	5.59	0.186147
331	0	1	0	39	0	infection	0	0	0	0	0	1	0	0	0	0	0	0	36.6	0	1.96	1181	1	60	1									0	0	0	1	4	0	0	0	0	0	52	1.67	12.4	0.20708	81.33	1.35821
332	0	0	0	61	1	OP	0	0	0	0	0	0	0	1	0	0	0	0	36.3	0	1.19	408	0	64	0	0	2.42	97.6	2.27	91.5	1.86	81.9	83.8	0	0	0	1	3	1	1	0	0	0	61.33	1.88	99.02	1.86158	1.89	0.035532
333	0	0	0	78	1	IP	0	0	0	1	0	0	0	0	0	0	0	1	36.8	0	1.53	896	1	76	0	0	1.23	56.9	1.25	57.9	1.08	86.4		0	0	0	1	5	0	0	0	1	0	31.33	1.91	80.93	1.54576	7.87	0.150317
334	0	0	0	80	1	IP	0	0	0	1	0	0	0	0	0	0	0	0	36.2	0	0.64	1349	1	73	0	0	1.94	85.5	1.9	83.7	1.5	78.9		0	0	0	1	2	0	0	1	0	0	31.33	1.39	86.43	1.20138	4.46	0.061994
335	0	1	0	62	0	CVDIP	0	0	0	0	0	0	0	0	0	1	0	3	37.6	0	6.03	237	0	98	0	1								1	0	0	1	1	1	4	0	0	0	32.67	10.53	6.63	0.698139	3.41	0.359073
336	0	1	0	70	0	other	1	0	0	0	0	0	0	0	0	0	0	1	36	0	3.26	794	1	58	1	1								0	0	1	1	3	0	0	1	0	1	50.67	4.62	51.31	2.37052	6.95	0.32109
337	0	0	0	52	1	sarcoidosis	0	0	0	0	0	0	1	0	0	0	0	0	36	0	0.04			83	0	0	2.89	112.9	2.81	109.8	1.25	44.5	116.9	0	0	0	1	1	1	1	0	0	0	52.67	0.66	87.46	0.577236	7.24	0.047784
338	0	0	0	60	1	IP	0	0	0	1	0	0	0	0	0	0	0	1	36.6	0	0.04	3831	1	86	0	1	2.2	97.3	2.18	96.5	1.86	85.3	53.7	0	0	0	1	3	0	0	0	0	0	46.67	2.4	51.31	1.23144	45.24	1.08576
339	0	0	0	74	1	OP	0	0	0	0	0	0	0	1	0	0	0	0	36.2	0	4.56	431	0	84	0	0	1.23	55.4	1.14	51.4	1.04	91.2		0	0	0	1	2	1	2	0	0	0	22.67	14.85	35.49	5.27027	51.98	7.71903
340	0	1	0	71	1	OP	0	0	0	0	0	0	0	1	0	0	0	0	37.1	0	16.82	142	0	57	1	1								0	0	0	0	0	1	4	0	1	0	14.67	3.73	10	0.373	76.3	2.84599
342	0	0	0	77	0	IP	0	0	0	1	0	0	0	0	0	0	0	2	37	0	0.53	742	1	63	0	0	3.03	96.5	2.94	93.6	1.57	53.4	115	0	0	0	1	4	1	1	0	0	1	53.33	8.57	46.13	3.95334	7.31	0.626467
343	0	0	0	71	0	IP	0	0	0	1	0	0	0	0	0	0	0	2	36.5	0	0.58	3685	1	77	0	1	2.13	67.8	2.1	66.9	1.84	87.6		0	0	0	1	5	0	0	0	1	0	33.33	2.3	69.51	1.59873	21.28	0.48944
344	0	0	0	54	0	IP	0	0	0	1	0	0	0	0	0	0	0	0	36.7	0	0.04	1268	1	99	0	0	3.38	96	3.44	97.7	2.93	85.2	132.4	1	0	0	1	2	0	0	0	0	1	61.33	1.95	91.06	1.77567	8.44	0.16458
345	0	1	0	78	0	DRUG	0	0	0	0	0	0	0	0	0	0	1	0	36.8	0	1.58	2436	1	55.9	1	1								0	0	0	1	5	1	2	0	0	0	44	4.97	16.19	0.804643	66.23	3.29163
346	0	0	0	61	0	OP	0	0	0	0	0	0	0	1	0	0	0	0	37	0	1.12	2214	1	84	0	0	2.73	80.5	2.8	82.6	2.31	82.5	80.6	0	0	0	1	4	0	0	0	0	0	46	16.5	7.93	1.30845	88.87	14.6636
347	0	0	0	59	1	other	1	0	0	0	0	0	0	0	0	0	0	0	36.7	0	0.08	394	0	68	0	0	2.34	96.7	2.04	84.3	1.31	64.2	127.8	0	0	0	1	4	0	0	0	0	0	52	6.36	31.73	2.01803	5.91	0.375876
348	0	0	0	55	1	other	1	0	0	0	0	0	0	0	0	0	0	0	36.4	0	0.27	279	0	82	0	0								0	0	0	1	3	1	1	0	0	0	42	4.77	33.07	1.57744	59.3	2.82861
349	0	0	0	78	0	IP	0	0	0	1	0	0	0	0	0	0	0	0	36.5	0	0.02	531	1	92	0	1	2.47	81.3	2.54	83.6	2.23	87.8	116.1	0	0	0	1	4	0	0	1	1	1	32	6.84	68.79	4.70524	12.2	0.83448
350	0	0	0	71	0	sarcoidosis	0	0	0	0	0	0	1	0	0	0	0	0	36.3	0	0.35	484	0	77	0	0	2.86	90.5	2.67	84.5	2.01	75.3		0	0	0	1	1	1	1	0	0	0	22.67	1.2	70.67	0.84804	28.26	0.33912
351	0	0	0	25	0	sarcoidosis	0	0	0	0	0	0	1	0	0	0	0	0	36.7	0	0.39	577	1	104	0	0	4.29	102.9	4.28	102.6	3.43	80.1	100.5	0	0	0	1	3	0	0	0	0	0	62.67	4.75	73.33	3.48318	26.32	1.2502
352	0	0	0	82	1	sarcoidosis	0	0	0	0	0	0	1	0	0	0	0	1	36.6	0	0.06	572	1	71	0	0								0	0	0	1	2	0	0	0	0	0	63.33	2.95	59.37	1.75142	40.52	1.19534
353	0	0	0	83	1	IP	0	0	0	1	0	0	0	0	0	0	0	2	36	0	0.04	2332	1	91	0	1	2.22	98.7	2.06	91.6	1.7	82.5		0	0	0	1	2	0	0	0	1	1	62	2.61	81.71	2.13263	12.81	0.334341
354	0	0	0	74	1	infection	0	0	0	0	0	1	0	0	0	0	0	3	37	0	1.32	1127	1	57	1	1								0	0	0	1	5	0	0	0	1	0	48	3.52	78.59	2.76637	14.16	0.498432
355	0	0	0	75	0	IP	0	0	0	1	0	0	0	0	0	0	0	0	36.3	0	0.06	288	0	91	0	0	3.55	107.9	3.41	103.6	2.5	73.3	94.5	0	0	0	1	2	0	0	0	0	0	40	1.98	86.39	1.71052	12.09	0.239382
356	0	0	0	76	1	CVDIP	0	0	0	0	0	0	0	0	0	1	0	0	38	1	12.63	145	0	99	0	0	1.63	74.8	1.52	69.7	1.12	73.7		0	0	0	0	0	1	4	0	0	0	72	1.41	90.26	1.27267	3.93	0.055413
357	0	0	0	69	1	CVDIP	0	0	0	0	0	0	0	0	0	1	0	0	37.3	0	2.64	756	1	60	1	0	0.9	42.9	0.74	35.2	0.72	97.3		1	0	0	1	5	0	0	0	1	0	35.33	1.09	54.51	0.594159	17.89	0.195001
359	0	0	0	82	0	other	1	0	0	0	0	0	0	0	0	0	0	0	35.3	0	0.2	455	0	80	0	1								0	0	0	1	1	1	1	0	0	0	20.67	1.96	82.65	1.61994	3.52	0.068992
360	0	0	0	76	1	DRUG	0	0	0	0	0	0	0	0	0	0	1		36.8	0	0.08	3203	1	75	0	1	1.37	60.1	1.43	62.7	1.13	79	49.2	0	0	0	1	4	0	0	0	0	0	27.33	4.9	37.68	1.84632	61.76	3.02624
362	0	0	0	81	1	sarcoidosis	0	0	0	0	0	0	1	0	0	0	0		36.7	0	0.26	602	1	73	0	0								0	0	0	1	3	0	0	0	0	0	51.33	2.48	58.73	1.4565	40.19	0.996712
363	0	0	0	62	1	CVDIP	0	0	0	0	0	0	0	0	0	1	0	0	35.8	0	0.24	396	0	95	0	0	2.15	87.8	2.15	87.8	1.77	82.3	77.5	0	0	0	1	2	0	0	0	0	0	64.67	2.25	90.54	2.03715	8.12	0.1827
364	0	0	0	64	1	sarcoidosis	0	0	0	0	0	0	1	0	0	0	0	0	36.2	0	0.06	7353	1	91	0	1	2.09	88.2	2.1	88.6	1.67	79.5	49.6	0	0	0	1	3	0	0	0	0	0	26	1.35	55.18	0.74493	41.31	0.557685
365	0	0	0	77	0	other	1	0	0	0	0	0	0	0	0	0	0	0	37.1	0	0.09	285	0	98	0	0	3.11	98.1	3.02	95.3	2.55	84.4	103.8	0	0	0	1	2	0	0	0	0	0	66.67	1.75	91.92	1.6086	8.08	0.1414
366	0	0	0	30	1	sarcoidosis	0	0	0	0	0	0	1	0	0	0	0	0	36.3	0	0.25	515	1	81	0	0	3.71	122.4	3.67	121.1	2.63	71.7	102.1	0	0	0	1	3	0	0	0	0	0	28.67	4.95	48.18	2.38491	48.24	2.38788
367	0	0	0	72	0	OP	0	0	0	0	0	0	0	1	0	0	0	0	36.2	0	6.7	588	1	98	0	1	3.07	96.5	3.06	96.2	2.29	74.8	120.3	0	0	0	1	3	1	2	0	0	0	71.33	4.56	41.76	1.90426	33.01	1.50526
368	0	1	0	50	0	EP	0	1	0	0	0	0	0	0	0	0	0	3	36.6	0	1.81	166	0	50	1		2.34	64.6	2.15	59.4	1.64	76.3		0	0	0	1	4	0	0	0	0	0	60.67	4.38	24.49	1.07266	2.4	0.10512
369	1	0	1	80	0	IP	0	0	0	1	0	0	0	0	0	0	0	2	37.5	0	11.95	387	0	74	0	1								1	0	0	1	4	0	0	1	0	0	42	8.09	63.73	5.15576	29.56	2.3914
370	0	0	0	40	1	other	1	0	0	0	0	0	0	0	0	0	0	0	36.7	0	0.06	196	0	77	0	1	2.81	101.8	2.79	101.1	2.12	76	98.7	0	0	0	1	1	0	0	0	0	0	17.33	1.37	52.62	0.720894	10.5	0.14385
371	0	0	0	52	1	sarcoidosis	0	0	0	0	0	0	1	0	0	0	0	0	37.1	0	0.35	398	0	75	0	0								0	0	0	1	1	0	0	0	0	0	65.33	3.4	46.53	1.58202	53.24	1.81016
372	0	0	0	74	0	OP	0	0	0	0	0	0	0	1	0	0	0	0	36.5	0	0.6	207	0	66	0	1	3.89	115.4	3.85	114.2	2.47	64.2	121.6	0	0	0	1	3	0	0	0	0	1	41.33	4.21	29.21	1.22974	63.16	2.65904
373	0	0	0	74	1	IP	0	0	0	1	0	0	0	0	0	0	0		36.6	0	0.21	1421	1	65	0	1	1.58	68.4	1.59	68.8	1.42	89.3	59.8	0	0	0	1	4	0	0	0	1	0	24.67	1.02	83.12	0.847824	7.18	0.073236
374	0	0	0	35	0	other	1	0	0	0	0	0	0	0	0	0	0	2	37	0	0.06	199	0	55	1	1	3.82	95.3	3.25	81	1.12	34.5	90.5	1	0	0	1	3	0	0	0	0	0	30	1.97	54.55	1.07464	19	0.3743
375	0	0	0	75	1	IP	0	0	0	1	0	0	0	0	0	0	0	0	36.5	0	0.09	827	1	75	0	0								0	0	0	1	2	0	0	0	0	0	49.33	2.05	49.79	1.02069	47.32	0.97006
376	0	0	0	69	1	IP	0	0	0	1	0	0	0	0	0	0	0	1	36.7	0	0.09	770	1	75	0	1	2.45	104.3	2.37	100.9	2.06	86.9	54.7	0	0	0	1	5	0	0	0	0	0	24.67	1.54	92.75	1.42835	4.15	0.06391
377	0	0	0	64	1	IP	0	0	0	1	0	0	0	0	0	0	0	0	36.1	0	0.06	925	1	79	0	0	2.53	108.6	2.52	108.2	2.07	82.1	94.7	0	0	0	1	2	0	0	0	0	0	32	1.07	82.83	0.886281	12.67	0.135569
378	0	0	0	48	0	sarcoidosis	0	0	0	0	0	0	1	0	0	0	0	0	36.3	0	0.09	480	0	78	0	0								0	0	0	1	2	0	0	0	0	0	55.33	1.62	85.04	1.37765	13.58	0.219996
380	0	0	0	53	0	IP	0	0	0	1	0	0	0	0	0	0	0	0	36.9	0	0.68	726	1	84	0	0	3.5	94.3	3.45	93	2.72	78.8	95.3	0	0	0	1	1	0	0	1	0	0	36	7.36	85.68	6.30605	9.7	0.71392
382	0	0	0	67	0	infection	0	0	0	0	0	1	0	0	0	0	0	0	37.2	0	5.98	836	1	53	1	0								0	0	0	1	2	1	3	0	0	1	10
383	0	0	0	58	1	sarcoidosis	0	0	0	0	0	0	1	0	0	0	0	0	36.7	0	0.18	845	1	80	0	0	2.22	87.1	2.2	86.3	1.81	82.3	69.4	0	0	0	1	5	0	0	0	0	0	62.67	1.15	85.73	0.985895	12.33	0.141795
384	0	0	0	56	1	sarcoidosis	0	0	0	0	0	0	1	0	0	0	0	1	36.5	0	0.08	7128	1	83	0	0	1.23	54.9	1.24	55.4	1.2	96.8	47	0	0	0	1	5	0	0	0	0	0	39.33	4.44	52.26	2.32034	34.76	1.54334
385	0	1	0	71	0	IP	0	0	0	1	0	0	0	0	0	0	0	0	36.2	0	2.26	1741	1	62	0	1	2.55	77.7	2.41	73.5	1.73	71.8	68.8	0	0	0	0	0	1	3	0	0	1	38	4.58	61.08	2.79746	26.15	1.19767
386	0	0	0	81	0	sarcoidosis	0	0	0	0	0	0	1	0	0	0	0	0	36.6	0	1.92	480	0	97	0	0	2.6	81.8	2.6	81.8	2.05	78.8		0	0	0	1	1	1	2	0	0	0	50.67	2.73	87.75	2.39558	10.85	0.296205
387	1	0	1	63	0	CVDIP	0	0	0	0	0	0	0	0	0	1	0	0	36.5	0	1.7	1436	1	84	0	1	2.74	79.7	2.71	78.8	2.17	80.1	49.3	0	0	0	1	5	0	0	0	0	1	37.33	5.42	90.69	4.9154	2.44	0.132248
388	0	0	0	52	1	OP	0	0	0	0	0	0	0	1	0	0	0	0	36.4	0	0.1	1857	1	91	0	0	2.73	103.4	2.76	104.5	2.08	75.4	62.8	0	0	0	1	1	1	2	0	1	0	50	1.64	70.03	1.14849	21.51	0.352764
390	0	0	0	61	0	HP	0	0	1	0	0	0	0	0	0	0	0	0	35.6	0	1.01	2169	1	74	0	1	3.75	106.8	3.65	104	2.82	77.3	77.5	0	0	0	1	5	0	0	0	0	0	46	6.4	27.91	1.78624	69.54	4.45056
391	0	0	0	39	0	sarcoidosis	0	0	0	0	0	0	1	0	0	0	0	0	36.3	0	0.38	274	0	104	0	0	5.28	136.1	5.2	134	4.13	79.4	113	0	0	0	1	2	0	0	0	0	0	43.33	2.03	93.71	1.90231	5.8	0.11774
393	0	0	0	80	1	sarcoidosis	0	0	0	0	0	0	1	0	0	0	0	0	36.4	0	0.89	256	0	90	0	0	1.25	62.2	1.17	58.2	0.75	64.1		1	0	0	1	2	0	0	0	0	0	41.33	0.96	88.36	0.848256	6.82	0.065472
395	0	1	0	59	0	OP	0	0	0	0	0	0	0	1	0	0	0	4	37.2	0	3.37	165	0	50	1	1								1	0	0	1	3	1	1	0	1	0	13.33	4.78	39.63	1.89431	3.17	0.151526
396	0	0	0	56	0	CVDIP	0	0	0	0	0	0	0	0	0	1	0	1	35.7	0	0.18	1899	1	86	0	1	2.32	64.3	2.3	63.7	2	87	45.1	0	0	0	1	4	1	2	0	0	0	54.67	4.44	55.28	2.45443	43.02	1.91009
397	0	0	0	87	0	sarcoidosis	0	0	0	0	0	0	1	0	0	0	0	1	36.9	0	0.27	360	0	91	0	1	1.72	77.8	1.58	71.5	0.83	52.5	58.7	0	0	0	1	5	0	0	0	0	0	46	3.65	61.62	2.24913	36.2	1.3213
398	0	0	0	75	1	CVDIP	0	0	0	0	0	0	0	0	0	1	0	0	35.8	0	0.17	683	1	71	0	1	1.25	56.6	1.34	60.6	1.11	82.8		0	0	0	1	5	0	0	0	1	0	22	4.17	19.2	0.80064	41.37	1.72513
399	0	0	0	71	0	CVDIP	0	0	0	0	0	0	0	0	0	1	0	0	35.7	0	3.05	436	0	80	0	0								1	1	0	1	3	0	0	1	0	1	20.67	1.72	73.62	1.26626	6.56	0.112832
400	0	0	0	64	0	OP	0	0	0	0	0	0	0	1	0	0	0	0	36.8	0	0.03	773	1	94	0	0	3.73	111.7	3.75	112.3	3.17	84.5	120.7	0	0	0	1	3	0	0	0	0	0	54.67	2.49	17.65	0.439485	77.2	1.92228
401	0	1	0	78	0	HP	0	0	1	0	0	0	0	0	0	0	0	2	35.9	0	0.4	1043	1	71	0	1	1.23	39.4	1.39	44.6	1.15	82.7		0	0	0	1	5	0	0	0	1	0	38.67	2.84	85.09	2.41656	9.73	0.276332
402	0	0	0	86	0	OP	0	0	0	0	0	0	0	1	0	0	0	2	36.5	0	12.77	132	0	93	0	0	1.31	40.7	1.39	43.2	1.35	97.1		0	0	0	1	2	1	1	0	0	0	58.67	5.48	47.96	2.62821	29.47	1.61496
403	0	0	0	71	0	IPF	0	0	0	0	1	0	0	0	0	0	0	0	35.9	0	0.08	426	0	93	0	1	2.52	79	2.46	77.1	2.01	81.7	104.1	0	0	0	1	4	0	0	0	0	0	64.67	2.61	69.87	1.82361	24.1	0.62901
404	0	0	0	55	0	IP	0	0	0	1	0	0	0	0	0	0	0		36.3	0	0.15	1203	1	82	0	1	3.82	109.8	3.85	110.6	2.7	70.1	88.8	0	0	0	1	4	0	0	0	0	1	50.67	2.4	81.44	1.95456	16.16	0.38784
405	0	0	0	65	1	IP	0	0	0	1	0	0	0	0	0	0	0	0	36	0	0.02	585	1	104	0	0	1.82	79.8	1.81	79.4	1.6	88.4	57.1	0	0	0	1	2	0	0	1	0	0	20.67	2.36	89.83	2.11999	8.65	0.20414
406	0	0	0	79	1	sarcoidosis	0	0	0	0	0	0	1	0	0	0	0	0	36.3	0	0.02	860	1	83	0	0	2.24	101.4	2.35	106.3	1.92	81.7	89.4	0	0	0	1	3	0	0	0	0	0	58.67	3.37	52.7	1.77599	32.52	1.09592
407	0	0	0	54	1	sarcoidosis	0	0	0	0	0	0	1	0	0	0	0	0	36.4	0	0.61	312	0	77	0	0	3.36	125.4	3.09	115.3	2.45	79.3	94.3	0	0	0	1	2	1	2	0	0	0	72.67	1.53	87.7	1.34181	7.4	0.11322
408	0	0	0	69	1	CVDIP	0	0	0	0	0	0	0	0	0	1	0	0	35.9	0	0.04	16241	1	78	0	1	2.02	92.7	2.06	94.5	1.68	81.6	73.6	0	0	0	1	3	0	0	0	0	0	46.67	2.01	58.28	1.17143	36.08	0.725208
409	0	0	0	54	1	CVDIP	0	0	0	0	0	0	0	0	0	1	0	0	36.5	0	4.36	145	0	75	0	0	2.01	77.9	2.08	80.6	1.65	79.3	95.4	0	0	0	1	1	1	3	0	0	0	48	1.25	72.16	0.902	18.19	0.227375
410	0	1	0	47	0	HP	0	0	1	0	0	0	0	0	0	0	0		36.4	0	0.22	794	1	63	0	1	4.69	115.2	4.71	115.7	3.72	79	61.9	0	0	0	1	2	0	0	0	0	1	72.67	19.73	26.9	5.30737	69.17	13.6472
411	0	0	0	72	0	IP	0	0	0	1	0	0	0	0	0	0	0	0	36.3	0	0.03	528	1	105	0	1	3.54	106	3.62	108.4	2.83	78.2	95.3	0	0	0	1	4	0	0	0	0	0	44.67	2.73	93.49	2.55228	6.15	0.167895
412	0	0	0	79	1	IP	0	0	0	1	0	0	0	0	0	0	0		36.5	0	0.06	7817	1	78	0	1	1.15	56.7	1.07	52.7	0.94	87.9		0	0	0	1	4	0	0	0	0	0	54.67	3.37	31.84	1.07301	66.25	2.23263
413	0	0	0	80	1	sarcoidosis	0	0	0	0	0	0	1	0	0	0	0	0	36.5	0	0.03	131	0	85	0	0	2.4	110.1	2.38	109.2	1.57	66	110.1	0	0	0	1	2	0	0	0	0	0	66	1.63	75.08	1.2238	22.47	0.366261
414	0	0	0	37	1	sarcoidosis	0	0	0	0	0	0	1	0	0	0	0	0	36.6	0	0.12	432	0	84	0	0	3.49	117.9	3.58	120.9	2.98	83.2	94.3	0	0	0	1	3	0	0	0	0	0	73.33	6.15	62.26	3.82899	36.15	2.22322
415	0	1	0	57	0	infection	0	0	0	0	0	1	0	0	0	0	0	0	38.1	1	12.68	220	0	55	1	1								0	0	0	1	3	0	0	0	0	1	28	5.93	51.47	3.05217	27.26	1.61652
416	0	0	0	88	0	OP	0	0	0	0	0	0	0	1	0	0	0	0	36	0	6.46	1466	1	74	0	0	2.07	64.9	1.9	59.6	1.43	75.3	60.7	0	0	0	1	1	1	3	1	0	0	21.33	4.87	43.87	2.13647	33.94	1.65288
417	0	0	0	61	1	other	1	0	0	0	0	0	0	0	0	0	0	0	35.8	0	0.12	502	1	69	0	1	1.75	72	1.83	75.3	1.47	80.3	55.1	0	0	0	1	3	1	2	0	0	0	48.67	4.49	44.61	2.00299	16.02	0.719298
419	0	0	0	86	0	IP	0	0	0	1	0	0	0	0	0	0	0	1	36.8	0	0.21	451	0	82	0	0								1	0	0	0	0	1	3	0	0	0	12.67	2.15	86.24	1.85416	10.31	0.221665
420	0	0	0	85	1	CVDIP	0	0	0	0	0	0	0	0	0	1	0	1	36.8	0	9.54	258	0	80	0	0								0	0	0	1	4	0	0	1	1	0	28.67	0.61	59.97	0.365817	31.94	0.194834
421	0	0	0	83	0	DRUG	0	0	0	0	0	0	0	0	0	0	1		36.1	0	1.72	437	0	111	0	0	3.12	96.3	2.85	88	2.08	73	90.5	0	0	0	1	2	0	0	0	0	0	25.33	4.85	27.8	1.3483	68.06	3.30091
422	0	0	0	71	0	sarcoidosis	0	0	0	0	0	0	1	0	0	0	0	0	36.8	0	0.16	159	0	96	0	0	3.18	99.4	3.13	97.8	2.72	86.9	139.8	0	0	0	0	0	1	2	0	1	0	55.33	0.82	81.18	0.665676	12.09	0.099138
424	0	0	0	65	0	lymphopro	0	0	0	0	0	0	0	0	1	0	0	0	36.8	0	0.2	1340	1	83	0	1	1.85	57.3	1.91	59.1	1.57	82.2	51.9	1	1	0	1	3	1	1	1	0	1	48.67	3.77	80.58	3.03787	8.52	0.321204
425	0	0	0	68	0	other	1	0	0	0	0	0	0	0	0	0	0	0	36.5	0	2.12	448	0	75	0	0								0	0	0	1	3	0	0	0	0	1	6
426	0	0	0	73	0	other	1	0	0	0	0	0	0	0	0	0	0	1	36.8	0	6.81	354	0	110	0	1								1	0	0	1	3	1	2	0	0	0	42	4.77	55.57	2.65069	35.33	1.68524
427	0	0	0	27	0	infection	0	0	0	0	0	1	0	0	0	0	0	0	36.5	0	0.4	2351	1	93	0	0								0	0	0	1	5	0	0	0	0	0	50	2.81	50.96	1.43198	44.53	1.25129
428	0	0	0	70	1	sarcoidosis	0	0	0	0	0	0	1	0	0	0	0	0	36.4	0	1.06	1161	1	91	0	0								0	0	0	1	4	0	0	0	1	1	40	4.75	44.61	2.11898	47.65	2.26337
429	0	0	0	55	1	lymphopro	0	0	0	0	0	0	0	0	1	0	0	0	36.6	0	5.27	405	0	90	0	0	3.1	123	3	119	2.49	83	91.7	1	0	0	1	5	0	0	0	0	0	60.67	1.44	93.18	1.34179	6.54	0.094176
430	0	0	0	52	0	OP	0	0	0	0	0	0	0	1	0	0	0	0	36.2	0	0.26	620	1	75	0	1	2.31	63.8	2.38	65.7	1.98	83.2	54.1	0	0	0	1	1	1	3	0	0	1	31.33	2.83	90.66	2.56568	7.18	0.203194
431	0	0	0	81	0	OP	0	0	0	0	0	0	0	1	0	0	0	0	36.7	0	20	173	0	58	1	0	2.46	77.8	2.32	73.4	1.62	69.8	108.3	0	0	0	1	2	1	3	0	0	0	34.67	0.88	69	0.6072	24.89	0.219032
432	0	0	0	83	0	sarcoidosis	0	0	0	0	0	0	1	0	0	0	0	1	36.3	0	0.15	846	1	83	0	0	2.8	87.5	2.94	91.9	2.45	83.3	87.3	0	0	0	1	2	1	2	0	1	0	17.33	2.37	76.14	1.80452	19.42	0.460254
433	0	0	0	75	1	IP	0	0	0	1	0	0	0	0	0	0	0	0	35.7	0	0.05	731	1	78	0	1	1.56	68.4	1.49	65.4	1.36	91.3	54.9	0	0	0	1	4	0	0	0	1	0	41.33	1.63	94.68	1.54328	1.61	0.026243
434	0	0	0	58	0	sarcoidosis	0	0	0	0	0	0	1	0	0	0	0		36.5	0	0.01	220	0	91	0	0	3.46	99.1	3.47	99.4	3.15	90.8	119.9	0	0	0	1	3	0	0	0	0	0	39.33	2.04	92.82	1.89353	4.2	0.08568
435	0	0	0	70	0	IP	0	0	0	1	0	0	0	0	0	0	0	0	35.9	0	2.21	2589	1	80	0	0	2.61	80.6	2.61	80.6	1.91	73.2	57	0	0	0	1	2	0	0	1	0	1	40	3.81	55.14	2.10083	33.63	1.2813
436	0	0	0	68	1	CVDIP	0	0	0	0	0	0	0	0	0	1	0		36.8	0	0.21	809	1	89	0	0	1.42	65.1	1.49	68.3	1.17	78.5	70.5	0	0	0	1	2	0	0	0	0	0	50	2.12	82.58	1.7507	15.9	0.33708
437	0	0	0	67	1	CVDIP	0	0	0	0	0	0	0	0	0	1	0		36.7	0	0.04	1205	1	85	0	0	2.77	118.4	2.73	116.7	2.16	79.1	84.5	0	0	0	1	2	0	0	0	0	0	53.33	3.86	34.05	1.31433	65.95	2.54567
438	0	0	0	34	1	CVDIP	0	0	0	0	0	0	0	0	0	1	0	0	36.4	0	0.21	787	1	100	0	1	2.25	76.3	2.32	78.6	2.23	96.1	50.4	0	0	0	1	3	0	0	0	0	0	46	2	77.41	1.5482	10.7	0.214
440	0	0	0	81	1	IP	0	0	0	1	0	0	0	0	0	0	0	2	36.9	0	1.11	600	1	76	0	0	1.15	53.7	1.18	55.1	1.06	89.8		0	0	0	1	3	0	0	0	1	0	14.67	1.06	18.77	0.198962	3.61	0.038266
441	0	0	0	77	0	IP	0	0	0	1	0	0	0	0	0	0	0	0	35.4	0	0.04	1020	1	98	0	0	3.37	105.3	3.31	103.4	2.48	74.9	109.4	0	0	0	1	2	0	0	0	0	0	41.33	5.38	96.19	5.17502	2.15	0.11567
442	0	0	0	57	1	CVDIP	0	0	0	0	0	0	0	0	0	1	0	0	36.7	0	0.88	1028	1	87	0	1	1	43.7	0.97	42.4	0.85	87.6		1	0	0	1	5	0	0	0	1	0	18	3.84	64.64	2.48218	22.33	0.857472
443	0	1	0	68	0	infection	0	0	0	0	0	1	0	0	0	0	0	0	36.5	0	3.43	1292	1	66	0	1								0	0	0	1	5	0	0	0	1	0	24	3.75	21	0.7875	62.6	2.3475
444	0	0	0	70	0	HP	0	0	1	0	0	0	0	0	0	0	0	0	36.6	0	0.28	565	1	102	0	0								0	0	0	1	3	0	0	0	0	0	68.67		62		37.6
447	0	0	0	81	0	other	1	0	0	0	0	0	0	0	0	0	0	0	36.6	0	1.08	143	0	75	0	0								0	0	0	1	2	0	0	0	0	1	26.67	1.95	86.3	1.68285	7.5	0.14625
448	0	1	0	73	0	CVDIP	0	0	0	0	0	0	0	0	0	1	0	2	36.5	0	3.66	1865	1	58	1	1	2.92	90.1	2.89	89.2	2.48	85.8	49.5	1	0	0	1	5	0	0	0	1	0	41.33	1.39	45.6	0.63384	8.5	0.11815
449	1	0	1	68	1	EP	0	1	0	0	0	0	0	0	0	0	0	0	36.1	0	3.5	307	0	95	0	1								0	0	0	1	3	1	2	0	0	0	38	4.45	62.7	2.79015	1.2	0.0534
450	1	0	1	63	0	infection	0	0	0	0	0	1	0	0	0	0	0	0	36.7	0	8.23	211	0	97	0	0								0	0	0	1	2	1	1	0	0	0	33.33	2.59	78.6	2.03574	11.1	0.28749
451	0	0	0	37	1	sarcoidosis	0	0	0	0	0	0	1	0	0	0	0	0	37.1	0	0.02	256	0	112	0	0	3.85	132.8	3.91	134.8	3.23	82.6	103.2	0	0	0	1	1	0	0	0	0	0	78	3.45	72	2.484	27	0.9315
452	0	0	0	34	1	EP	0	1	0	0	0	0	0	0	0	0	0	0	36	0	0.33	346	0	104	0	0	2.72	94.8	2.61	90.9	1.8	69	100.1	0	0	0	1	2	1	2	0	0	0	56.67		6.3		2.5
453	0	0	0	59	1	sarcoidosis	0	0	0	0	0	0	1	0	0	0	0	0	35.9	0	0.08	495	0	95	0	0	3.13	128.3	3.23	132.4	2.57	79.6	119.7	0	0	0	1	1	0	0	0	0	0	56.67	1.08	75.3	0.81324	22.1	0.23868
454	0	0	0	31	1	sarcoidosis	0	0	0	0	0	0	1	0	0	0	0	0	35.7	0	0.01	956	1	99	0	0	3.06	99.4	3.02	98.1	1.85	61.3	96.3	0	0	0	1	5	0	0	0	0	0			95.5		4.3
455	0	1	0	77	0	CVDIP	0	0	0	0	0	0	0	0	0	1	0		36.8	0	6.21	1966	1	56	1	1	2.55	81.2	2.53	80.6	1.78	70.4	69.8	0	0	0	1	5	0	0	0	1	1	60	5.4	52	2.808	43.7	2.3598
456	0	0	0	52	0	IP	0	0	0	1	0	0	0	0	0	0	0	0	36.9	0	0.05	814	1	80	0	1	3.62	97.1	3.5	93.8	2.91	83.1	87.3	0	0	0	1	2	0	0	1	0	0	34	3.48	57	1.9836	1.5	0.0522
457	0	0	0	72	0	sarcoidosis	0	0	0	0	0	0	1	0	0	0	0	0	35.4	0	0.24	725	1	111	0	1	2.93	92.1	2.8	88.1	1.95	69.6	98.1	0	0	0	1	4	0	0	0	0	0	74.67	2.14	75	1.605	24	0.5136
458	0	0	0	75	1	IP	0	0	0	1	0	0	0	0	0	0	0	0	36.7	0	0.13	2329	1	107	0	1	2.32	109.4	2.39	112.7	1.79	74.9	56.7	0	0	0	1	4	0	0	0	0	0	40	15.4	15	2.31	82	12.628
459	0	0	0	79	1	IP	0	0	0	1	0	0	0	0	0	0	0	1	36.3	0	0.11	443	0	99	0	0	1.89	82.9	1.66	72.8	1.3	78.3	54.1	0	0	0	1	2	0	0	0	0	0	34	0.72	91.3	0.65736	4.6	0.03312
460	0	0	0	76	0	IP	0	0	0	1	0	0	0	0	0	0	0	0	35.5	0	0.11	375	0	108	0	1	1.85	54.4	1.92	56.5	1.56	81.3	61.4	0	0	0	1	4	0	0	0	0	1	56	3.11	93.3	2.90163	5.6	0.17416
461	1	0	1	75	1	CVDIP	0	0	0	0	0	0	0	0	0	1	0	0	36.1	0	2.04	1029	1	81	0	1	1.6	73.1	1.52	69.4	1.31	86.2	41.5	0	0	0	1	5	0	0	0	1	0	53.33	4.27	87.5	3.73625	9.1	0.38857
462	0	0	0	76	1	IP	0	0	0	1	0	0	0	0	0	0	0		36.4	0	0.11	647	1	94	0	1	2.07	90	2.08	90.4	1.58	76	41.3	0	0	0	1	4	0	0	0	1	0	60	1.42	82	1.1644	16.3	0.23146
465	0	0	0	74	0	CVDIP	0	0	0	0	0	0	0	0	0	1	0	0	36.7	0	1.97	1348	1	76	0	0	2.21	68	2.29	70.5	2.01	87.8	60.7	0	0	0	1	5	0	0	0	1	1	50	2.2	89.3	1.9646	10.3	0.2266
467	0	0	0	53	0	other	1	0	0	0	0	0	0	0	0	0	0	0	36.4	0	12.58	121	0	87	0	0	4.06	106.8	3.44	90.5	2.93	85.2		0	0	0	1	2	1	1	0	0	0	28.67	9.34	18.6	1.73724	20.3	1.89602
468	1	1	0	79	1	DRUG	0	0	0	0	0	0	0	0	0	0	1	3	37.5	0	5.03	693	1	62	0		1.65	83.8	1.37	69.5	0.8	58.4		0	0	0	1	4	0	0	0	0	0	43.33	8.6	15	1.29	5	0.43
469	0	0	0	81	1	OP	0	0	0	0	0	0	0	1	0	0	0	0	36.5	0	0.05	860	1	77	0	1	2.06	94.5	2.15	98.6	1.67	77.7	80.3	0	0	0	1	1	1	1	0	0	0	44	2.05	43	0.8815	53	1.0865
470	0	0	0	62	0	IPF	0	0	0	0	1	0	0	0	0	0	0	0	36.5	0	0.36	2224	1	92	0	1	2.72	77.3	2.69	76.4	2.28	84.8	55.6	0	0	0	1	3	0	0	0	0	0	43.33	4.5	62.8	2.826	34	1.53
471	0	0	0	66	0	IPF	0	0	0	0	1	0	0	0	0	0	0	0	36.1	0	0.41	1086	1	109	0	1	4.28	118.9	4.32	120	3.42	79.2	62.5	0	0	0	1	1	0	0	1	1	1	46.67	2.46	89.1	2.19186	8.3	0.20418
472	0	0	0	60	0	sarcoidosis	0	0	0	0	0	0	1	0	0	0	0	0	35.9	0	0.08	686	1	88	0	0	4.09	120.6	3.92	115.6	3.21	81.9	65.2	0	0	0	1	2	0	0	0	0	1	66.67	2.44	61.4	1.49816	34	0.8296
473	0	0	0	57	1	OP	0	0	0	0	0	0	0	1	0	0	0	0	37.5	0	2.11	407	0	96	0	0	3.06	119.5	2.95	115.2	2.3	78	99.9	0	0	0	1	3	0	0	0	0	0	43.33	3.3	72	2.376	21	0.693
474	0	0	0	64	1	sarcoidosis	0	0	0	0	0	0	1	0	0	0	0	0	36.4	0	0.1			95	0	0	2.34	103.1	2.4	105.7	1.86	77.5	95.1	0	0	0	1	1	1	1	0	0	0	70	0.35	94	0.329	5.1	0.01785
475	0	0	0	80	1	IP	0	0	0	1	0	0	0	0	0	0	0	0	36.5	0	0.12	4212	1	57	1	1	2.18	94.4	2.22	96.1	1.87	84.2	34.4	0	0	0	1	3	0	0	1	1	0	38	4.16	50.5	2.1008	44.5	1.8512
476	0	0	0	68	1	sarcoidosis	0	0	0	0	0	0	1	0	0	0	0	0	36.6	0	0.11	424	0	75	0	0	2.5	108.7	2.52	109.6	1.8	71.4	101.8	0	0	0	1	1	0	0	0	0	0	40	1.2	83	0.996	12	0.144
477	0	1	0	57	1	other	1	0	0	0	0	0	0	0	0	0	0	2	37.4	0	14.87	2253	1	51	1	1	2.93	113.1	2.82	108.9	2.55	90.4	46.2	0	0	0	1	4	1	3	0	0	0	40		42.5		48.6
478	0	0	0	56	1	sarcoidosis	0	0	0	0	0	0	1	0	0	0	0	0	36.9	0	0.53	535	1	90	0	0	2.98	116.4	2.88	112.5	2.5	86.8	69.8	0	0	0	1	2	0	0	0	0	0	56.67	1.04	65.6	0.68224	32.7	0.34008
479	0	1	0	63	1	OP	0	0	0	0	0	0	0	1	0	0	0		36.7	0	26.03	475	0	59	1									0	0	0	1	2	1	3	0	0	0	26.67	2.47	47.6	1.17572	25.4	0.62738
480	0	1	0	78	0	CVDIP	0	0	0	0	0	0	0	0	0	1	0	3	37.3	0	17.11	254	0	60	1									0	0	0	1	3	1	1	0	0	1	8	0.34	20	0.068	15	0.051
481	0	0	0	55	1	other	1	0	0	0	0	0	0	0	0	0	0	0	36.1	0	0.66	362	0	67	0	0	1.34	55.4	1.24	51.2	1.03	83.1		0	0	0	0	0	1	4	0	1	0	56	0.9	27	0.243	3	0.027
483	0	1	0	19	0	EP	0	1	0	0	0	0	0	0	0	0	0		39.3	1	7.52	123	0	55	1									0	0	0	1	4	0	0	0	0	0	56.67	2.97	32	0.9504	5.8	0.17226
484	0	0	0	73	0	lymphopro	0	0	0	0	0	0	0	0	1	0	0	2	36	0	2.75	131	0	99	0	0								0	0	0	1	2	0	0	0	0	0	56	2.7	94.6	2.5542	4.6	0.1242
485	0	0	0	66	0	other	1	0	0	0	0	0	0	0	0	0	0	0	35.2	0	0.05	362	0	96	0	0	1.91	60.3	1.99	62.8	1.57	78.9	35.9	0	0	0	1	1	1	1	0	1	1	8	1.92	73	1.4016	6.1	0.11712
486	0	0	0	75	1	other	1	0	0	0	0	0	0	0	0	0	0		36.3	0	0.04	308	0	88	0	0	2.2	104.3	2.23	105.7	1.81	81.2	67	0	0	0	1	2	0	0	0	0	0	43.33	0.94	83.6	0.78584	15.7	0.14758
487	0	0	0	76	0	OP	0	0	0	0	0	0	0	1	0	0	0	0	36.7	0	4.6	669	1	94	0	0	2.7	81.3	2.57	77.4	2.06	80.2	62.3	0	0	0	1	4	0	0	0	0	0	18	9.23	56.7	5.23341	25.7	2.37211
489	0	0	0	64	0	EP	0	1	0	0	0	0	0	0	0	0	0	0	36.7	0	0.02	504	1	71	0	0								0	0	0	1	3	0	0	0	0	1	20	0.75	28.8	0.216	60	0.45
491	0	1	0	59	1	infection	0	0	0	0	0	1	0	0	0	0	0		38.3	1	31.09	470	0	40	1									0	0	0	1	3	1	3	0	0	0	58	3.34	32.6	1.08884	9.8	0.32732
492	0	0	0	77	1	other	1	0	0	0	0	0	0	0	0	0	0	0	36.8	0	0.61	3422	1	61	0	1	1.59	71.3	1.61	72.2	1.3	80.7	58.1	0	0	0	1	5	0	0	0	0	0	21.33	14.78	6	0.8868	8.7	1.28586
494	0	0	0	85	0	OP	0	0	0	0	0	0	0	1	0	0	0	0	36.5	0	0.11	3148	1	81	0	1	2.36	77.4	2.33	76.4	1.93	82.8	47.8	0	0	0	1	4	0	0	0	0	0	44.67	4.95	45.3	2.24235	50.4	2.4948
496	0	0	0	32	1	HP	0	0	1	0	0	0	0	0	0	0	0	0	36.7	0	0.18	611	1	99	0	0	1.77	61.7	1.61	56.1	1.5	93.2	42.6	0	0	0	1	2	1	2	0	0	0	65.33	3.93	51.87	2.03849	41.46	1.62938
497	0	0	0	39	1	EP	0	1	0	0	0	0	0	0	0	0	0	0	36.7	0	1.66	153	0	91	0	0								1	0	0	1	2	0	0	0	0	0	41.33	2.35	66	1.551	5.3	0.12455
498	0	0	0	63	0	IP	0	0	0	1	0	0	0	0	0	0	0	0	36.3	0	0.1	1352	1	89	0	1	2.1	60.3	2.14	61.5	1.89	88.3	40.9	0	0	0	1	3	0	0	1	0	0	58.67	1.74	85.5	1.4877	9.8	0.17052
499	0	1	0	78	0	IP	0	0	0	1	0	0	0	0	0	0	0		36.9	0	1.32	1246	1	146	0	1								1	0	0	1	4	0	0	1	1	0
500	0	0	0	66	0	HP	0	0	1	0	0	0	0	0	0	0	0		36.7	0	20.05	471	0	65	0	1	2.51	74.9	2.4	71.6	1.54	64.2	39.4	0	0	0	1	5	0	0	0	0	0	50	11.85	55.5	6.57675	23.8	2.8203
[truncated: 9 more columns]

## Sheet: 388_without_Progressive cases
	AEafterBAL	AEbeforeBAL	AE after BAL excluding beforeAE	age	female	diagnosis group	other	EP	HP	IP	IPF	infection	sarcoidosis	OP	lymphoproliferative disease	CVDIP	DRUG	PS	BT	BT≧38	CRP	KL-6	KL-6≧500	PaO2	PaO2≦60	Desaturation On Exertion	VC(L)	%VC	FVC(L)	%FVC	FEV1(L)	FEV1%G	DLCO	steroid at BAL	immunosuppressant	Antifibrotics	GGO	GGOnumber	consolidation	consolidation number	honeycombing	bronchoectasis	emphysema	Collection Rate Of BAL	cellconcentration10*5	macrophage%	macrophage	lymphocyte%	lymphocyte
1	0	0	0	60	1	CVDIP	0	0	0	0	0	0	0	0	0	1	0	0	36.6	0	0.04	1874	1	91	0	1	2.09	76.6	2.13	82.2	1.66	77.9	67.9	0	0	0	1	3	0	0	1	1	0	62.67	2.75	73.23	2.01383	25.53	0.702075
2	0	0	0	55	0	IP	0	0	0	1	0	0	0	0	0	0	0	0	36.3	0	0.05	781	1	91	0	0	3.33	78.2	3.34	80.3	2.98	89.2		0	0	0	1	3	0	0	0	1	0	38	2.24	96.31	2.15734	1.8	0.04032
3	0	0	0	67	1	sarcoidosis	0	0	0	0	0	0	1	0	0	0	0	0	35.9	0	0.09	430	0	78.6	0	0	2.28	106	2.33	115.9	1.81	77.7	76.9	0	0	0	1	3	0	0	0	0	0	54	1.89	72.99	1.37951	11.8	0.22302
7	1	0	1	16	0	EP	0	1	0	0	0	0	0	0	0	0	0	3	36.6	0	1.88	162	0	70.6	0	1	2.61	67.6	2.59	67.1	2.44	94.2		0	0	0	1	5	1	2	0	0	0	48	4.28	51	2.1828	13.34	0.570952
8	0	0	0	79	0	HP	0	0	1	0	0	0	0	0	0	0	0	0	36.4	0	0.01	1008	1	90	0	1	2.6	82	2.64	85.7	2.08	78.8	72.1	0	0	0	1	4	0	0	0	1	0	28.67	1.75	80.85	1.41487	16.73	0.292775
9	0	0	0	68	0	CVDIP	0	0	0	0	0	0	0	0	0	1	0	0	36.4	0	0.12	2303	1	89.3	0	1	3.38	93.9	3.31	94.3	2.73	82.5	79.2	0	0	0	1	2	0	0	1	1	0	30	1.33	60.69	0.807177	23.74	0.315742
11	0	0	0	71	0	IP	0	0	0	1	0	0	0	0	0	0	0	0	35.9	0	0.01	2889	1	89.3	0	1	2.76	79.1	2.77	81.5	2.22	80.1		0	0	0	1	1	0	0	0	1	0	60	1.8	39.15	0.7047	60.75	1.0935
12	0	0	0	70	0	infection	0	0	0	0	0	1	0	0	0	0	0	0	36.8	0	2.16	765	1	104	0	0	1.98	52.9	2.03	55.9	1.97	97		0	0	0	1	1	1	4	0	1	0	30	1.6	74.06	1.18496	16.76	0.26816
13	0	0	0	56	0	IP	0	0	0	1	0	0	0	0	0	0	0	0	36	0	0.12	957	1	82.2	0	0	2.67	63	2.58	62.3	2.07	80.2	65.6	0	0	0	1	2	0	0	0	0	0	25.33	2	54.77	1.0954	43.93	0.8786
14	0	0	0	80	1	HP	0	0	1	0	0	0	0	0	0	0	0	0	36.8	0	0.09	1194	1	104	0	1								0	0	0	1	3	1	1	0	1	0	32.67	2.96	60.5	1.7908	33.1	0.97976
15	0	0	0	66	1	sarcoidosis	0	0	0	0	0	0	1	0	0	0	0	0	36	0	0.01	243	0	104	0	0	2.9	111.1	2.86	116.3	2.08	72.7	88.4	0	0	0	1	3	0	0	0	0	0	59.33	2.62	52.57	1.37733	44.2	1.15804
17	0	0	0	74	0	OP	0	0	0	0	0	0	0	1	0	0	0	0	35.8	0	11.85			73	0	0								0	0	0	1	3	1	2	0	0	0	50.67	1.79	68.26	1.22185	26.31	0.470949
18	0	0	0	51	0	other	1	0	0	0	0	0	0	0	0	0	0	0	36.1	0	0.05	6087	1	65.8	0	1	2.51	65.9	2.5	66.7	2.03	81.2	51.9	0	0	0	1	1	0	0	0	0	0	28	11.01	16.31	1.79573	83.69	9.21427
19	0	0	0	62	0	IP	0	0	0	1	0	0	0	0	0	0	0	0	36.3	0	0.44	807	1	72.8	0	1	3.43	88.4	3.18	84.1	2.8	88.1	71.7	0	0	0	0	0	0	0	1	1	0	15.33	1.64	73.61	1.2072	9.21	0.151044
20	0	0	0	80	0	CVDIP	0	0	0	0	0	0	0	0	0	1	0	1	37	0	11.6	458	0	82	0	0								0	0	0	1	4	1	2	1	1	0	54	1.96	77.17	1.51253	16.88	0.330848
21	0	0	0	78	1	OP	0	0	0	0	0	0	0	1	0	0	0	2	36.8	0	0.48	260	0	86.2	0	0								0	0	0	0	0	1	4	0	1	0	22.67	5.28	58.59	3.09355	25.01	1.32053
22	0	0	0	73	1	sarcoidosis	0	0	0	0	0	0	1	0	0	0	0	0	37	0	0.11	560	1	78.6	0	0	1.66	78.3	1.73	87.4	1.05	60.7	71.6	0	0	0	1	4	0	0	0	0	0	47.33	0.42	58.84	0.247128	35.76	0.150192
24	0	0	0	52	1	infection	0	0	0	0	0	1	0	0	0	0	0	0	36.7	0	6.55	277	0	104	0	0								1	0	0	0	0	1	2	0	0	0
25	0	0	0	76	0	infection	0	0	0	0	0	1	0	0	0	0	0	0	36.1	0	5.37	349	0	78.7	0	0								1	1	0	1	2	0	0	0	0	1	12.67	4.69	25.85	1.21237	9.08	0.425852
26	0	0	0	76	0	other	1	0	0	0	0	0	0	0	0	0	0	0	36.4	0	0.78	253	0	95.9	0	0	3.53	101.1	3.54	104.7	2.6	73.4	115.3	0	0	0	1	2	0	0	0	0	0	52	1.15	82.83	0.952545	15.53	0.178595
27	0	0	0	59	0	IP	0	0	0	1	0	0	0	0	0	0	0	0	36.3	0	0.01	748	1	87.6	0	1	3.04	80.4	2.98	80.5	2.34	78.5	66.1	0	0	0	1	2	0	0	1	1	0	29.33	1.6	90.63	1.45008	6.51	0.10416
28	0	0	0	70	1	infection	0	0	0	0	0	1	0	0	0	0	0	0	36.4	0	0.02			86.8	0	0								0	0	0	1	1	1	1	0	0	0	45.33	0.87	89.01	0.774387	6.13	0.053331
29	0	0	0	56	1	OP	0	0	0	0	0	0	0	1	0	0	0	0	36.6	0	0.59	218	0	84.6	0	0	2.75	100.7	2.73	105.4	2.38	87.2	122.8	0	0	0	1	5	1	5	0	1	0	26	1.04	77.22	0.803088	8.9	0.09256
30	0	0	0	35	0	sarcoidosis	0	0	0	0	0	0	1	0	0	0	0	0	36.5	0	0.04	180	0	83.1	0	0	4.76	102.8	4.77	104.6	4.04	84.7	115.9	0	0	0	1	4	0	0	0	0	0	41.33	0.84	76.4	0.64176	21.83	0.183372
31	0	0	0	67	1	IP	0	0	0	1	0	0	0	0	0	0	0	0	36	0	0.03	1893	1	68.3	0	1								0	0	0	1	5	0	0	0	1	0	58	1.6	90.51	1.44816	5.99	0.09584
32	0	0	0	15	0	CVDIP	0	0	0	0	0	0	0	0	0	1	0	0	36.4	0	0.27	3689	1	96	0	0	2.33	56.3	2.29	55.3	2.12	92.6	52.4	0	0	0	1	3	0	0	0	1	0	63.33	7.15	72.72	5.19948	18.11	1.29487
33	0	0	0	26	0	sarcoidosis	0	0	0	0	0	0	1	0	0	0	0	0	36.6	0	0.12			91	0	0	4	85.1	3.95	84.9	3.69	93.4	96.3	0	0	0	0	0	1	1	0	0	0	43.33	3.34	76.2	2.54508	23.57	0.787238
34	0	0	0	47	0	sarcoidosis	0	0	0	0	0	0	1	0	0	0	0	0	36.1	0	0.21	456	0	71.6	0	0	3.05	75.1	2.93	73.4	2.29	78.2	89.1	0	0	0	1	5	0	0	0	0	0	52	2.31	66.95	1.54655	31.97	0.738507
35	0	0	0	67	1	EP	0	1	0	0	0	0	0	0	0	0	0	0	36.6	0	0.05	338	0	71.9	0									0	0	0	1	2	1	2	0	1	0	38	10.42	12.32	1.28374	5.35	0.55747
36	0	0	0	68	1	CVDIP	0	0	0	0	0	0	0	0	0	1	0	0	36.3	0	0.08	299	0	95.5	0	0	2.52	101.6	2.38	102.1	1.87	78.6	74.1	0	0	0	0	0	0	0	1	1	0	57.33	1.1	95.07	1.04577	2.73	0.03003
37	0	0	0	70	0	IPF	0	0	0	0	1	0	0	0	0	0	0	0	36.3	0	0.3	553	1	84.2	0	1	3.81	107	3.88	111.8	3.26	84	52.8	0	0	0	0	0	0	0	1	1	1	17.33	4.12	40.15	1.65418	4.52	0.186224
40	0	0	0	69	0	DRUG	0	0	0	0	0	0	0	0	0	0	1	0	36.4	0	0.02	1688	1	85.1	0	1	3.05	87.4	2.95	86.5	2.86	96.9	61	0	0	0	0	0	0	0	1	1	1	38.67	2.28	46.13	1.05176	45.93	1.0472
41	0	0	0	66	1	IP	0	0	0	1	0	0	0	0	0	0	0	0	36.5	0	0.06	230	0	84.7	0	1	2.45	93.2	2.57	103.6	2.18	84.8	95.3	0	0	0	1	3	1	2	0	0	0	66.67	2.87	96.5	2.76955	1.48	0.042476
42	0	0	0	72	1	other	1	0	0	0	0	0	0	0	0	0	0	0	36.2	0	0.72	587	1	65.2	0	0	1.96	84.8	1.93	89.4	1.39	72	102.9	0	0	0	1	5	1	2	0	1	0	58.67	5.13	27.89	1.43076	1.37	0.070281
43	0	0	0	79	0	OP	0	0	0	0	0	0	0	1	0	0	0	0	35.8	0	1.76	483	0	77.6	0	0								0	0	0	1	4	0	0	0	1	0	56	5.43	8.23	0.446889	90.93	4.9375
44	0	0	0	68	1	other	1	0	0	0	0	0	0	0	0	0	0	0	36.5	0	0.83			73.4	0	0	2.44	91.4	2.33	92.5	1.41	60.5		0	0	0	1	3	0	0	0	0	0	39.33	10.47	22.89	2.39658	5.32	0.557004
45	0	0	0	65	0	CVDIP	0	0	0	0	0	0	0	0	0	1	0	0	36.5	0	1.76	672	1	96.3	0	0	3.4	97.4	3.43	100.3	2.89	84.3	83.1	0	0	0	0	0	0	0	0	1	1	30	3.3	80.89	2.66937	12.42	0.40986
46	0	0	0	61	1	CVDIP	0	0	0	0	0	0	0	0	0	1	0	0	36.5	0	0.93	2115	1	87.9	0	0	2.45	90.1	2.52	98.1	2.01	79.8	65	0	0	0	1	3	0	0	0	1	0	21.33	1.08	45.3	0.48924	7.48	0.080784
49	0	0	0	61	1	other	1	0	0	0	0	0	0	0	0	0	0	1	36.1	0	0.2	558	1	92.3	0	0	2.11	71.8	1.75	62.7	1.39	79.4	73.6	0	0	0	1	2	0	0	0	0	0	55.33	2.35	50.24	1.18064	46.67	1.09675
50	0	0	0	70	0	DRUG	0	0	0	0	0	0	0	0	0	0	1	0	36.3	0	0.33	1034	1	89.4	0	0	1.95	52.6	1.75	48.5	1.75	100		0	0	0	0	0	0	0	1	1	0	29.33	5.86	64.2	3.76212	4.88	0.285968
51	0	0	0	69	0	IP	0	0	0	1	0	0	0	0	0	0	0	0	36.8	0	0.03	1131	1	89.7	0	0	3.53	107.6	3.56	110.9	2.65	74.4	92.3	0	0	0	1	4	0	0	0	1	0	50.67	1.65	83.38	1.37577	12.13	0.200145
52	0	0	0	66	1	IPF	0	0	0	0	1	0	0	0	0	0	0	0	35.5	0	0.27	1105	1	66	0	1	2.42	95.7	2.39	100.4	1.6	66.9	44.4	0	0	0	1	2	0	0	0	0	1	41.33	4.93	82.44	4.06429	3.32	0.163676
53	0	0	0	64	1	DRUG	0	0	0	0	0	0	0	0	0	0	1	0	37.1	0	0.68	655	1	74.9	0	0	2.92	104.7	2.84	107.6	2.07	72.9	61.4	0	0	0	1	5	1	5	0	0	0	38.67	2.96	54.92	1.62563	39.63	1.17305
54	0	0	0	56	1	IPF	0	0	0	0	1	0	0	0	0	0	0	0	36.5	0	0.09	663	1	98.3	0	0	1.95	68.2	1.93	71	1.61	83.4	74.4	0	0	0	1	2	0	0	1	1	1	50	1.48	77.19	1.14241	14.58	0.215784
56	0	0	0	69	1	CVDIP	0	0	0	0	0	0	0	0	0	1	0	0	34.5	0	0.03	791	1	79.3	0	1	2.63	94.6	2.72	103.8	2.18	80.1	72.1	0	0	0	1	4	0	0	0	0	0	48	1.27	72.54	0.921258	21.54	0.273558
59	0	0	0	49	1	CVDIP	0	0	0	0	0	0	0	0	0	1	0	0	37.7	0	0.68	304	0	86.2	0	0	2.11	74.3	1.97	72.7	1.62	82.2	68.1	0	0	0	0	0	1	2	0	0	0	19.33	2.13	55.58	1.18385	37.59	0.800667
60	0	0	0	65	0	IP	0	0	0	1	0	0	0	0	0	0	0	0	36	0	0.26	679	1	59	1	1	3.56	97.5	3.61	101.4	3.23	89.5	84.2	0	0	0	1	3	0	0	0	1	0	51.33	1.55	84.08	1.30324	10.72	0.16616
61	0	0	0	66	1	other	1	0	0	0	0	0	0	0	0	0	0	0	36.6	0	0.07	282	0	91.2	0	0	2.21	96.1	2	92.6	1.25	62.5		0	0	0	1	3	0	0	0	0	0	38.67	1.36	63.58	0.864688	6.98	0.094928
62	0	0	0	77	0	sarcoidosis	0	0	0	0	0	0	1	0	0	0	0	0	35.7	0	0.03	285	0	84.9	0	0	3.69	129.5	3.79	136.3	2.29	60.4	86.5	0	0	0	1	1	0	0	0	0	1	14	0.75	74.2	0.5565	24.2	0.1815
64	0	0	0	70	0	IPF	0	0	0	0	1	0	0	0	0	0	0	0	36.3	0	0.12	1338	1	61.4	0	1	2.38	67.8	2.44	71.3	2.07	84.8	60.9	0	0	0	0	0	0	0	1	1	0	46.67	3.37	97.01	3.26924	1.45	0.048865
65	0	0	0	70	0	IP	0	0	0	1	0	0	0	0	0	0	0	0	36.7	0	0.09	1724	1	99.5	0	1	2.76	82.4	2.67	81.7	2.22	83.1	79.1	0	0	0	1	4	0	0	1	1	0	46.67	2.63	64.11	1.68609	8.09	0.212767
66	0	0	0	72	0	IP	0	0	0	1	0	0	0	0	0	0	0	0	36.4	0	0.09	887	1	86.2	0	1	2.65	74.4	2.6	75.1	1.69	65	64.9	0	0	0	1	3	0	0	0	0	0	48.67	2.21	77.76	1.7185	21.35	0.471835
67	0	0	0	76	1	HP	0	0	1	0	0	0	0	0	0	0	0	2	36.7	0	0.09	918	1	65.4	0	1	2.08	88.5	2.04	93.2	1.63	79.9	60.8	0	0	0	1	5	0	0	0	0	0	51.33	2.93	65.38	1.91563	29.14	0.853802
68	0	0	0	76	0	IP	0	0	0	1	0	0	0	0	0	0	0	2	36.7	0	1.12	365	0	90.8	0	0								0	0	0	1	4	1	2	0	0	0	53.33	3.37	94.84	3.19611	3.12	0.105144
69	0	0	0	64	0	OP	0	0	0	0	0	0	0	1	0	0	0	0	35.9	0	2.28	1254	1	73.9	0	0	3.53	89.8	3.39	88.5	2.5	73.7	113.7	0	0	0	1	2	1	2	0	0	0	34.67	3.45	47.87	1.65152	44.29	1.52801
70	0	0	0	23	1	other	1	0	0	0	0	0	0	0	0	0	0	0	36.8	0	0.36	348	0	75.3	0	1	2.24	65.5	2.16	65.3	1.71	79.2	67.9	1	0	0	1	4	1	2	0	1	0	58	9.31	50.5	4.70155	1.35	0.125685
71	0	0	0	75	0	IP	0	0	0	1	0	0	0	0	0	0	0	0	36.5	0	0.16	836	1	69.9	0	1	2.65	69.7	2.62	71.2	2.22	84.7	48.3	0	0	0	1	3	0	0	0	1	1	14.67	0.82	82.31	0.674942	8.43	0.069126
72	0	0	0	64	0	infection	0	0	0	0	0	1	0	0	0	0	0	0	36.4	0	1.6	236	0	78.5	0	0	3.95	98.3	4.09	104.3	3.21	78.5	149	0	0	0	1	4	0	0	0	0	0	34	4.36	61.13	2.66527	25.75	1.1227
73	1	0	1	68	0	other	1	0	0	0	0	0	0	0	0	0	0	0						？		0								0	0	0	1	4	1	3	0	0	0	25.33	2	70.7	1.414	21.8	0.436
75	0	0	0	64	0	IPF	0	0	0	0	1	0	0	0	0	0	0	2	36.5	0	0.53	869	1	68.9	0	1	1.68	45.5	1.47	40.8	1.47	100		0	0	0	1	3	1	1	1	1	1	17.33	1.62	72.16	1.16899	2.79	0.045198
76	0	0	0	49	1	sarcoidosis	0	0	0	0	0	0	1	0	0	0	0	0	36.2	0	0.08	1312	1	85	0	0	3.82	104.1	3.81	108.5	2.83	74.3	69.2	0	0	0	1	5	0	0	0	0	0	61.33	9.55	31.63	3.02067	68.27	6.51979
80	0	0	0	81	1	IPF	0	0	0	0	1	0	0	0	0	0	0	0	36.2	0	0.02	844	1	79	0	1	1.98	94.3	1.94	100	1.51	77.8	50.3	0	0	0	0	0	0	0	1	0	0	60	3.14	75.3	2.36442	19.74	0.619836
82	0	0	0	51	0	infection	0	0	0	0	0	1	0	0	0	0	0	0	36.9	0	0.37	439	0	89	0	1	3.67	80	3.67	81.9	3.22	87.7	85.2	0	0	0	1	2	1	1	0	0	0	23.33	4.16	46.79	1.94646	5.34	0.222144
84	0	0	0	72	0	IP	0	0	0	1	0	0	0	0	0	0	0	0	36	0	0.05	988	1	74	0	0	3	92.3	2.9	91.5	2.11	72.8	100.1	0	0	0	1	2	0	0	0	0	0	57.33	3.15	36.39	1.14628	63.18	1.99017
86	0	0	0	76	0	HP	0	0	1	0	0	0	0	0	0	0	0	0	36.6	0	0.08	2505	1	67	0	0	2.85	83.3	2.76	83.1	2.44	88.4	60.1	0	0	0	1	4	0	0	1	1	0	32	4.1	32.6	1.3366	65.39	2.68099
87	0	0	0	72	1	IP	0	0	0	1	0	0	0	0	0	0	0	0	36.3	0	0.11	343	0	75	0	0	2.23	97	2.16	100	1.61	74.5	86.8	0	0	0	1	1	0	0	0	1	0	40.67	1.86	95.97	1.78504	2.75	0.05115
89	0	0	0	57	0	CVDIP	0	0	0	0	0	0	0	0	0	1	0	0	36.8	0	0.15	2043	1	71	0	1	3.13	74.2	3.13	76.2	2.64	84.3	44.5	0	0	0	1	5	0	0	0	1	0	64.67	5.51	95.1	5.24001	1.76	0.096976
91	0	0	0	73	0	CVDIP	0	0	0	0	0	0	0	0	0	1	0	0	36.3	0	0.44	543	1	77	0	0	2.6	81.3	2.63	84.3	2.16	82.1	93.4	0	0	0	1	3	0	0	0	0	0	58.67	1.83	82.8	1.51524	7.37	0.134871
92	0	0	0	71	1	CVDIP	0	0	0	0	0	0	0	0	0	1	0	0	35.5	0	0.25	1220	1	66	0	0	1.29	55.1	1.24	56.4	1.05	84.7	57.7	0	0	0	1	5	1	5	0	0	0	19.33	1.57	70.46	1.10622	21.27	0.333939
93	0	0	0	82	0	IP	0	0	0	1	0	0	0	0	0	0	0	0	35.7	0	1.29	453	0	83	0	0	1.86	59.6	1.88	62	1.71	91	107.8	0	0	0	1	1	0	0	0	1	0	64	1.6	87.57	1.40112	3.06	0.04896
94	0	0	0	81	0	OP	0	0	0	0	0	0	0	1	0	0	0	0	36.2	0	0.03	462	0	97	0	0								0	0	0	1	2	0	0	0	1	0	38.67	4.81	21.15	1.01731	78.7	3.78547
95	0	0	0	74	0	CVDIP	0	0	0	0	0	0	0	0	0	1	0	0	36	0	0.03	849	1	89	0	0								0	0	0	0	0	0	0	1	0	1	36	1.22	38.75	0.47275	55.48	0.676856
97	0	0	0	74	1	DRUG	0	0	0	0	0	0	0	0	0	0	1	0	36.6	0	0.08	3629	1	67	0	1	1.77	78.3	1.82	86.3	1.56	85.7	62	1	0	0	1	4	0	0	0	0	0	42	2.75	72.7	1.99925	24.75	0.680625
98	0	0	0	68	0	OP	0	0	0	0	0	0	0	1	0	0	0	0	36.4	0	1.16	600	1	80	0	1	1.54	43.1	1.43	41.1	1.22	85.3	47.6	0	0	0	1	5	0	0	0	0	0	42	10.38	36.7	3.80946	54.33	5.63945
100	0	0	0	79	0	OP	0	0	0	0	0	0	0	1	0	0	0	0	36.6	0	0.34	1582	1	93	0	1	3	94.6	2.9	93.9	1.97	67.9	76.3	0	0	0	1	4	0	0	0	0	0	50	1.52	72.67	1.10458	25.37	0.385624
103	0	0	0	39	1	IP	0	0	0	1	0	0	0	0	0	0	0	0	36.9	0	1.24	447	0	95	0	0	0.82	26.4	0.82	27.4	0.79	96.3		0	0	0	1	2	0	0	0	0	0	60	1.36	84.26	1.14594	10.23	0.139128
104	0	0	0	70	0	IP	0	0	0	1	0	0	0	0	0	0	0	0	36.2	0	0.02	1744	1	94	0	0	2.62	75.1	2.7	79.4	2.27	84.1	86.7	0	0	0	1	4	0	0	0	0	0	46	2.25	87.6	1.971	10.82	0.24345
105	0	0	0	69	0	IP	0	0	0	1	0	0	0	0	0	0	0	0	36.3	0	0.21	924	1	86	0	0	2	62.5	1.96	62.4	1.49	76	32.7	0	0	0	0	0	0	0	1	1	1	13.33	3.15	83.74	2.63781	6.54	0.20601
106	0	0	0	68	0	IP	0	0	0	1	0	0	0	0	0	0	0		36.8	0	0.19	743	1	61	0	1	1.9	51.5	1.92	53.3	1.64	85.4	45.3	0	0	0	1	3	0	0	1	1	0	19.33	4.82	82.63	3.98277	4.64	0.223648
113	0	0	0	69	0	CVDIP	0	0	0	0	0	0	0	0	0	1	0	0	36.5	0	1.68	1020	1	77	0	1	2.32	68.8	2.29	69.6	1.91	83.4	72.3	0	0	0	1	4	0	0	1	1	0	48	4.23	52.35	2.21441	46.6	1.97118
114	0	0	0	53	1	sarcoidosis	0	0	0	0	0	0	1	0	0	0	0	0	36	0	0.19	204	0	82	0	0	2.67	91.8	2.64	95.3	1.89	71.6	86.3	0	0	0	1	2	1	1	0	0	0	66.67	3.9	50.81	1.98159	48.11	1.87629
115	0	0	0	62	1	sarcoidosis	0	0	0	0	0	0	1	0	0	0	0	0	36.5	0	0.17	277	0	73	0	0	3.79	141.4	3.7	145.7	2.76	74.6	88.1	0	0	0	1	3	1	1	0	0	0	47.33	0.75	81.33	0.609975	18.05	0.135375
116	0	0	0	64	1	CVDIP	0	0	0	0	0	0	0	0	0	1	0	0	35.9	0	0.23	728	1	76	0	1	1.18	49.8	1.14	50.9	0.9	78.9		0	0	0	0	0	1	3	0	0	0	44	2.45	49.03	1.20124	40.7	0.99715
117	0	0	0	64	0	DRUG	0	0	0	0	0	0	0	0	0	0	1	0	36.3	0	0.14	758	1	86	0	0	3.76	91.7	3.83	96	3.1	80.9	97.5	1	0	0	1	5	0	0	0	0	0	38	5.21	28.43	1.4812	58.3	3.03743
118	0	0	0	63	1	HP	0	0	1	0	0	0	0	0	0	0	0	1	36.6	0	0.15	2005	1	71	0	1	2.29	87.4	2.3	93.1	1.87	81.3	57.8	0	0	0	1	5	0	0	0	0	0	60	12.04	23.22	2.79569	74.07	8.91803
119	0	0	0	52	1	OP	0	0	0	0	0	0	0	1	0	0	0	0	36.3	0	0.02	278	0	149	0	0								0	0	0	1	3	0	0	0	0	0	62.67	4.04	38.29	1.54692	47.51	1.9194
120	0	0	0	58	0	IP	0	0	0	1	0	0	0	0	0	0	0	0	35.9	0	0.07	631	1	83	0	0	3.45	90.1	3.35	89.3	2.47	73.7	85	0	0	0	1	2	0	0	1	0	1	64.67	4.48	96.21	4.31021	2.82	0.126336
122	0	0	0	77	0	IP	0	0	0	1	0	0	0	0	0	0	0	0	36.6	0	0.19	814	1	60	1	0	2.2	68.5	2.29	73.4	2.1	91.7	94	0	0	0	0	0	1	2	0	1	0	34.67	1.13	92.29	1.04288	6.74	0.076162
123	0	0	0	69	1	CVDIP	0	0	0	0	0	0	0	0	0	1	0		36.7	0	1.24	289	0	89	0	0	1.77	83.9	1.82	91.9	1.54	84.6	84.2	0	0	0	0	0	0	0	1	0	0	55.33	1.53	82.47	1.26179	16.14	0.246942
124	0	0	0	78	0	IP	0	0	0	1	0	0	0	0	0	0	0	0	35.8	0	0.03	202	0	97	0	0	2.46	75.9	2.49	79	1.8	72.3	85.8	0	0	0	0	0	1	1	1	0	0	41.33	1.06	85.35	0.90471	9.34	0.099004
127	0	0	0	72	0	sarcoidosis	0	0	0	0	0	0	1	0	0	0	0	0	35.7	0	0.19	201	0	89	0	0	3.6	104	3.43	101.8	2.42	70.6		0	0	0	1	2	0	0	0	0	1	48	2.62	82.57	2.16333	16.31	0.427322
128	0	0	0	67	0	IP	0	0	0	1	0	0	0	0	0	0	0		36.3	0	0.27	807	1	91	0	1	1.95	62.7	1.83	60	1.66	90.7	58.6	0	0	0	1	5	1	2	1	0	0	38.67	1.18	91.67	1.08171	5.39	0.063602
129	0	0	0	18	1	other	1	0	0	0	0	0	0	0	0	0	0	0	36.9	0	0.09	437	0	102	0	0	2.97	85.6	2.94	87.2	2.72	92.5	72.9	0	0	0	1	5	0	0	0	0	0	44	1.2	59.78	0.71736	39.37	0.47244
130	0	0	0	62	1	lymphopro	0	0	0	0	0	0	0	0	1	0	0	0	35.9	0	0.19	186	0	92	0	0	2.46	85.7	2.42	89	1.97	81.4	106	0	0	0	1	4	0	0	0	0	0	62.67	0.66	91.56	0.604296	7.85	0.05181
131	0	0	0	61	1	IP	0	0	0	1	0	0	0	0	0	0	0	0	36.9	0	0.02	381	0	81	0	0	2.65	101.9	2.61	106.1	2.07	79.3	97.3	0	0	0	0	0	1	2	0	0	0	62	0.8	82.39	0.65912	15.41	0.12328
132	0	0	0	66	1	sarcoidosis	0	0	0	0	0	0	1	0	0	0	0	0	36.4	0	0.15	269	0	78	0	0	2.19	91.3	2.19	96.9	1.54	70.3	113.3	0	0	0	0	0	1	2	0	0	0	13.33	0.66	58.7	0.38742	20.47	0.135102
133	0	0	0	69	1	other	1	0	0	0	0	0	0	0	0	0	0	0	36.1	0	0.1	356	0	67	0	0	2.58	98.5	2.52	102	1.97	78.2	86.6	0	0	0	0	0	1	5	0	0	0	54	0.73	89.9	0.65627	6.99	0.051027
134	0	0	0	53	0	lymphopro	0	0	0	0	0	0	0	0	1	0	0		36	0	0.46	159	0	91	0	0								0	0	0	0	0	1	1	0	0	0
135	0	0	0	78	1	infection	0	0	0	0	0	1	0	0	0	0	0	0	36.4	0	1.76	563	1	70	0	0	1.43	68.1	1.41	72.3	1.07	75.9		1	0	0	0	0	1	4	0	0	0	39.33	6.87	46.89	3.22134	52.73	3.62255
136	0	0	0	61	1	other	1	0	0	0	0	0	0	0	0	0	0	0	36.4	0	0.16			62	0	0	1.69	60.8	1.37	52.1	0.71	51.8		0	0	0	1	2	0	0	0	0	0	29.33	5.07	34.75	1.76182	18.26	0.925782
137	0	0	0	61	0	CVDIP	0	0	0	0	0	0	0	0	0	1	0	0	36	0	0.05	577	1	98	0	0	4.52	105.1	4.62	110.3	3.34	72.3	103	0	0	0	1	2	0	0	0	0	0	56	1.2	93.71	1.12452	2.26	0.02712
138	0	0	0	62	0	IPF	0	0	0	0	1	0	0	0	0	0	0	0	36.6	0	0.06	1547	1	100	0	1	2.79	92.1	2.72	90.7	2.32	85.3	74.2	0	0	0	1	2	0	0	0	0	1	44.67	2.18	94.43	2.05857	3.98	0.086764
141	0	0	0	67	0	OP	0	0	0	0	0	0	0	1	0	0	0	0	36.7	0	10.64	167	0	76	0	0	5.02	134.2	4.98	136.8	2.46	49.4	84.4	0	0	0	1	1	1	1	0	0	1	44.67	1.21	78.23	0.946583	18.82	0.227722
142	0	0	0	51	1	infection	0	0	0	0	0	1	0	0	0	0	0	0	35.8	0	6.07	320	0	87	0	0								1	0	0	0	0	1	2	0	0	0	36.67	6.78	50.84	3.44695	5	0.339
144	0	0	0	82	0	IP	0	0	0	1	0	0	0	0	0	0	0	0	36.8	0	2.38	985	1	70	0	0	2.33	81.8	2.17	78.1	1.7	78.3	73.5	0	0	0	1	3	0	0	0	0	0	54.67	3.38	64.86	2.19227	31.02	1.04848
146	0	0	0	74	0	IP	0	0	0	1	0	0	0	0	0	0	0	0	35.7	0	0.22	3717	1	88	0	1	2.25	72.8	2.11	69.9	1.68	79.6	65.2	0	0	0	0	0	1	3	1	1	0	66	3.14	95.16	2.98802	3.12	0.097968
147	0	0	0	63	1	CVDIP	0	0	0	0	0	0	0	0	0	1	0	0	35.9	0	0.25	776	1	88	0	0	2.2	82.1	2.17	85.4	1.64	75.6	83.1	0	0	0	1	2	0	0	0	0	0	45.33	1.23	80.05	0.984615	12.22	0.150306
148	0	0	0	81	0	OP	0	0	0	0	0	0	0	1	0	0	0	0	36.1	0	0.09	771	1	69	0	0	2.27	70.1	2.2	70.1	1.63	74.1	91.8	0	0	0	0	0	1	1	0	0	1	25.33	17.96	58.4	10.4886	36.74	6.5985
152	0	0	0	63	1	IP	0	0	0	1	0	0	0	0	0	0	0	0	36.5	0	0.22	9587	1	113	0	0	2.58	111.7	2.54	116.5	2.05	80.7	76.8	0	0	0	1	2	0	0	0	0	0	44.67	4.1	15.15	0.62115	84.47	3.46327
153	0	0	0	64	0	lymphopro	0	0	0	0	0	0	0	0	1	0	0	0	36.1	0	0.11			104	0	0								0	0	0	1	3	0	0	0	0	0	27.33	2.86	60.4	1.72744	31.9	0.91234
154	0	0	0	65	0	DRUG	0	0	0	0	0	0	0	0	0	0	1	0	35.3	0	0.08	790	1	92	0	0	2.5	60.7	2.41	60.1	1.77	73.4	61.3	0	0	0	1	5	0	0	0	0	0	40	3.52	62.09	2.18557	8.1	0.28512
157	0	0	0	77	1	sarcoidosis	0	0	0	0	0	0	1	0	0	0	0	0	36.6	0	0.04	287	0	93	0	0								0	1	0	1	2	0	0	0	0	0	44.67	1.4	77.6	1.0864	6.73	0.09422
158	0	0	0	71	1	IP	0	0	0	1	0	0	0	0	0	0	0	0	35.8	0	0.31	1253	1	97	0	0	2.74	109.6	2.67	113.6	2.04	76.4	78.9	0	0	0	1	4	0	0	0	0	0	46	1.37	56.76	0.777612	39.33	0.538821
160	0	0	0	73	0	HP	0	0	1	0	0	0	0	0	0	0	0	0	36.5	0	0.19	2472	1	72	0	1	3.17	85.9	3.21	89.7	2.46	76.6	65.6	0	0	0	1	5	0	0	0	0	0	48.67	3.24	28.71	0.930204	66.52	2.15525
161	0	0	0	63	0	CVDIP	0	0	0	0	0	0	0	0	0	1	0	0	36.4	0	1.5	664	1	87	0	1	1.95	52.7	2.01	55.5	1.77	88.1	55.8	0	0	0	1	1	1	3	1	1	1	48	4.52	88.74	4.01105	7.68	0.347136
162	0	0	0	68	0	IP	0	0	0	1	0	0	0	0	0	0	0	0	37	0	0.34	1617	1	90	0	0	3.64	96.8	3.57	97.5	3.18	89.1	56.5	0	0	0	1	5	0	0	0	1	0	36	2.39	95.19	2.27504	1.93	0.046127
163	0	0	0	62	1	IP	0	0	0	1	0	0	0	0	0	0	0	0	36.2	0	0.02	378	0	98	0	0	2.15	85.7	2.13	89.9	1.76	82.6	100	0	0	0	1	3	0	0	0	0	0	45.33	1.48	95.1	1.40748	2.09	0.030932
164	0	0	0	64	0	CVDIP	0	0	0	0	0	0	0	0	0	1	0	0	36.5	0	0.24	1251	1	101	0	1	1.67	51.1	1.63	50.8	1.2	73.6	48.3	0	0	0	1	4	1	1	1	1	0	60	3.33	66.72	2.22178	31.42	1.04629
165	0	0	0	76	1	CVDIP	0	0	0	0	0	0	0	0	0	1	0	0	36.6	0	0.29	658	1	77	0	0	2	85.1	1.96	89.5	1.52	77.6	71.4	0	0	0	1	3	0	0	1	0	0	60.67	3.73	94.3	3.51739	2.5	0.09325
166	0	0	0	79	0	IP	0	0	0	1	0	0	0	0	0	0	0	3	35.4	0	0.92	391	0	111	0	0	2.81	91.2	2.88	96	2.09	72.6	75	0	0	0	1	2	0	0	0	0	0	58	1.75	95.87	1.67773	3	0.0525
168	0	0	0	81	0	IP	0	0	0	1	0	0	0	0	0	0	0	0	36	0	0.06	1080	1	100	0	1	2.06	66.7	1.95	63.1	1.59	81.5	68.9	0	0	0	1	4	0	0	0	1	0	44	1.81	91.09	1.64873	5.57	0.100817
169	0	0	0	62	0	IP	0	0	0	1	0	0	0	0	0	0	0	0	36.3	0	0.28	411	0	81	0	0	3.11	93.4	2.75	82.6	2.15	78.2	91.1	0	0	0	1	4	0	0	0	0	0	56	3.08	94.96	2.92477	3.16	0.097328
171	0	0	0	64	1	CVDIP	0	0	0	0	0	0	0	0	0	1	0		36.2	0	0.05	1877	1	83	0	1	1.59	72.6	1.55	70.8	1.31	84.5	53.6	1	0	0	1	4	0	0	0	0	0	65.33	2.26	87.84	1.98518	9.39	0.212214
172	0	0	0	79	0	CVDIP	0	0	0	0	0	0	0	0	0	1	0	0	36.5	0	0.06	966	1	91	0	0	2.45	79	2.38	76.8	1.91	80.3	84.9	0	0	0	0	0	0	0	1	0	0	26.67	1.31	86.24	1.12974	5.34	0.069954
174	0	0	0	76	1	CVDIP	0	0	0	0	0	0	0	0	0	1	0	0	36.3	0	0.15	1071	1	116	0	1	1.09	49.3	1.05	47.5	0.94	89.5		0	0	0	1	4	0	0	0	1	0	57.33	2.2	96.49	2.12278	0.09	0.00198
176	0	0	0	58	1	IP	0	0	0	1	0	0	0	0	0	0	0	0	36.7	0	0.31	831	1	84	0	0	2.05	84.7	1.96	81	1.68	85.7	57.4	0	0	0	1	3	0	0	0	0	0	66.67	2.12	97.26	2.06191	1.94	0.041128
177	0	0	0	78	1	IP	0	0	0	1	0	0	0	0	0	0	0	1	36.1	0	0.54	1209	1	68	0	1	1.93	87.3	1.74	78.7	1.46	83.9	48.3	0	0	0	1	4	0	0	1	0	1	53.33	3.76	35.72	1.34307	57.27	2.15335
178	0	0	0	65	1	lymphopro	0	0	0	0	0	0	0	0	1	0	0	0	36.5	0	5.74	182	0	72	0	0	2.64	113.8	2.7	116.4	2.21	81.9	75.6	0	0	0	1	5	0	0	0	0	0	60.67	1.21	90.98	1.10086	7.19	0.086999
179	0	0	0	50	1	sarcoidosis	0	0	0	0	0	0	1	0	0	0	0	0	36	0	0.46	301	0	94	0	0	4.09	112.4	4.02	110.4	2.77	68.9	91.2	0	0	0	0	0	1	1	0	0	0	68.67	2.52	68.7	1.73124	28.49	0.717948
180	0	0	0	64	0	sarcoidosis	0	0	0	0	0	0	1	0	0	0	0	0	36.1	0	2.1	160	0	81	0	0								0	0	0	0	0	1	1	0	0	0	56.67	4.66	84.1	3.91906	10.18	0.474388
181	0	0	0	75	1	IP	0	0	0	1	0	0	0	0	0	0	0	0	36.4	0	0.06	417	0	65	0	1	1.65	74.7	1.59	71.9	1.23	77.4	86.5	0	0	0	1	3	0	0	0	0	0	20	1.33	64.67	0.860111	27.56	0.366548
182	0	0	0	54	1	lymphopro	0	0	0	0	0	0	0	0	1	0	0	0	36.7	0	4.01	197	0	85	0	0	3.97	147	3.92	145.2	2.92	74.5	76.9	0	0	0	1	2	0	0	0	0	0	51.33	1.1	88.44	0.97284	8.17	0.08987
183	0	0	0	72	1	sarcoidosis	0	0	0	0	0	0	1	0	0	0	0	0	36.9	0	0.19	125	0	107	0	0	2.84	129.7	2.87	131.1	2.11	73.5		0	0	0	1	1	0	0	0	0	0	54	1.27	90.57	1.15024	1.6	0.02032
184	0	0	0	64	0	IP	0	0	0	1	0	0	0	0	0	0	0	0	36.2	0	0.92	362	0	77	0	1	2.67	81.2	2.61	79.3	2.14	82	98.9	0	0	0	1	4	0	0	0	0	0	36.67	3.7	98.45	3.64265	0.71	0.02627
185	0	0	0	46	0	HP	0	0	1	0	0	0	0	0	0	0	0	0	36.1	0	0.12	1867	1	62	0	1	3	81.5	2.89	78.5	1.99	68.9	75.6	0	0	0	1	5	0	0	0	0	0	62.67	3.7	44.97	1.66389	53.89	1.99393
186	0	0	0	26	0	other	1	0	0	0	0	0	0	0	0	0	0	0	37.2	0	0.2	263	0	129	0	1	2.94	74.4	2.89	73.2	2.33	80.6	66.2	0	0	0	1	4	0	0	0	0	0	48	3.11	97.91	3.045	0.59	0.018349
187	0	0	0	67	0	IP	0	0	0	1	0	0	0	0	0	0	0	0	36	0	0.07	485	0	100	0	0	3.85	106.6	3.86	106.9	2.77	71.8	73.9	0	0	0	1	3	0	0	0	0	1	28	3.08	88.74	2.73319	8.29	0.255332
188	0	0	0	53	0	IP	0	0	0	1	0	0	0	0	0	0	0	0	36.3	0	0.12	1962	1	91	0	1	3.21	88.7	3.08	85.1	2.46	79.9	65.3	0	0	0	1	4	0	0	1	1	0	27.33	4.66	81.9	3.81654	7.91	0.368606
190	0	0	0	62	1	other	1	0	0	0	0	0	0	0	0	0	0	0	36.5	0	0.29	285	0	85	0	0								0	0	0	0	0	1	2	0	1	0	27.33	1.15	35	0.4025	20.44	0.23506
191	0	0	0	60	1	sarcoidosis	0	0	0	0	0	0	1	0	0	0	0	0	36.4	0	0.08	194	0	106	0	0	2.74	112.3	2.72	111.5	2.27	83.5	89.2	0	0	0	1	1	1	1	0	0	0	29.33	3.99	77.76	3.10262	20.74	0.827526
192	0	0	0	80	0	IP	0	0	0	1	0	0	0	0	0	0	0	0	36.3	0	0.02	451	0	79	0	0	2.12	69.5	2.13	69.8	1.98	93	65	0	0	0	0	0	1	2	1	1	1	36	1.56	82.05	1.27998	5.9	0.09204
193	0	0	0	74	1	IP	0	0	0	1	0	0	0	0	0	0	0	0	36.3	0	0.05	621	1	83	0	0	2.31	106.5	2.32	106.9	1.51	65.1	75.1	0	0	0	1	2	0	0	0	0	1	52	1.01	93.7	0.94637	3.33	0.033633
195	0	0	0	64	1	CVDIP	0	0	0	0	0	0	0	0	0	1	0	0	36.6	0	0.23	876	1	87	0	0	2.04	83.6	2	82	1.81	90.5	95.4	0	0	0	1	4	0	0	0	1	0	64.67	1.18	75.09	0.886062	9.35	0.11033
197	0	0	0	68	1	CVDIP	0	0	0	0	0	0	0	0	0	1	0	0	36.3	0	0.59	1349	1	89	0	1	1.38	62.4	1.38	62.4	1.17	84.8	40.1	0	0	0	1	5	0	0	0	0	0	30.67	3.12	85.8	2.67696	3.63	0.113256
200	0	0	0	56	1	OP	0	0	0	0	0	0	0	1	0	0	0		36.5	0	0.03	164	0	104	0	0	2.58	100.8	2.59	101.2	2.19	84.6	93	0	0	0	1	3	0	0	0	0	0	65.33	1.93	80.97	1.56272	17.62	0.340066
201	0	0	0	69	0	IP	0	0	0	1	0	0	0	0	0	0	0	0	36.4	0	0.05	1205	1	100	0	1	3.05	90.2	2.91	86.1	2.35	80.8	65.3	0	0	0	1	4	0	0	0	0	1	40	2.2	83.11	1.82842	6.86	0.15092
202	0	0	0	61	0	OP	0	0	0	0	0	0	0	1	0	0	0	0	36.4	0	1.63	2953	1	82	0	1	3.45	101.5	3.35	98.5	2.31	69		0	0	0	1	2	0	0	0	0	1	36.67	6.76	47.44	3.20694	51.77	3.49965
203	0	0	0	70	1	OP	0	0	0	0	0	0	0	1	0	0	0	2	36.6	0	0.26	2781	1	66	0	1	1.84	84.4	1.69	77.5	1.29	76.3		0	0	0	1	2	1	3	0	0	1	58	3.7	51.12	1.89144	40.94	1.51478
204	0	0	0	57	0	OP	0	0	0	0	0	0	0	1	0	0	0	0	36.7	0	0.17	1698	1	88	0	0	3.76	98.9	3.72	97.9	3.06	82.3	109.3	0	0	0	1	3	1	1	0	0	0	60	3.65	24.08	0.87892	66.59	2.43054
205	0	0	0	60	0	IP	0	0	0	1	0	0	0	0	0	0	0	0	36.3	0	0.79	538	1	98	0	0	3.76	110.6	3.7	108.8	3.02	81.6	102.6	0	0	0	1	2	0	0	0	0	0	56	3.33	87.34	2.90842	8.76	0.291708
206	0	0	0	66	1	CVDIP	0	0	0	0	0	0	0	0	0	1	0	0	36.1	0	0.22	2758	1	94	0	0	1.8	81.4	1.85	83.7	1.42	76.8	50.7	0	0	0	1	4	0	0	0	0	1	60.67	7.46	95.86	7.15116	3.13	0.233498
207	0	0	0	60	0	IP	0	0	0	1	0	0	0	0	0	0	0	0	36.4	0	0.15	1079	1	80	0	0	3.23	97.9	3.08	93.3	2.31	75	69.9	0	0	0	1	4	0	0	0	0	1	51.33	2.75	39.6	1.089	59.46	1.63515
209	0	0	0	33	0	sarcoidosis	0	0	0	0	0	0	1	0	0	0	0	0	36.2	0	0.53	451	0	85	0	0	5.13	119.3	5.08	118.1	3.99	78.5	118.2	0	0	0	1	1	1	1	0	0	0	30	8.71	15.08	1.31347	84.5	7.35995
210	0	0	0	80	0	IP	0	0	0	1	0	0	0	0	0	0	0	0	35.6	0	0.07	1081	1	68	0	1	2.67	87.8	2.7	88.8	2.03	75.2	60.5	0	0	0	1	4	0	0	1	0	1	22.67	3.71	75.79	2.81181	4.65	0.172515
211	0	0	0	70	1	sarcoidosis	0	0	0	0	0	0	1	0	0	0	0	0	36.4	0	0.11			71	0	0	1.86	83.4	1.83	82.1	1.48	80.9	61.3	0	0	0	0	0	1	2	0	0	0	36	1.1	84.55	0.93005	14.36	0.15796
212	0	0	0	66	0	CVDIP	0	0	0	0	0	0	0	0	0	1	0	0	35.5	0	0.58	247	0	87	0	0	4.7	133.5	4.82	136.9	3	62.2	113.8	0	0	0	1	2	0	0	0	0	1	44	4.34	94.58	4.10477	0.04	0.001736
213	0	0	0	50	0	HP	0	0	1	0	0	0	0	0	0	0	0	0	36.9	0	0.25	828	1	75	0	1	3.77	100	3.73	98.9	2.19	58.7	97.9	0	0	0	1	3	0	0	0	0	1	52.67	12.32	14.46	1.78147	64.54	7.95133
215	0	0	0	24	0	sarcoidosis	0	0	0	0	0	0	1	0	0	0	0	0	37.4	0	0.02	151	0	89	0	0	5.44	124.5	5.53	126.5	4.56	82.5	136.3	0	0	0	1	3	0	0	0	0	1	62	2.91	94.74	2.75693	4.94	0.143754
216	0	0	0	72	0	IP	0	0	0	1	0	0	0	0	0	0	0	0	35.6	0	0.09	599	1	93	0	0	3.13	92.6	3.13	92.6	2.61	83.4	97.6	0	0	0	1	3	0	0	0	0	0	52.67	1.43	95.12	1.36022	3.28	0.046904
217	0	0	0	68	1	infection	0	0	0	0	0	1	0	0	0	0	0	0	36	0	0.29	527	1	64	0	0	2.37	102.6	2.51	108.7	2.03	80.9	94	0	0	0	1	3	0	0	0	1	0	68	1.43	85.07	1.2165	6.93	0.099099
218	0	0	0	80	0	DRUG	0	0	0	0	0	0	0	0	0	0	1	0	35.9	0	0.09	368	0	87	0	0	3.2	96.4	3	90.4	2.27	75.7	95.2	0	0	0	1	3	0	0	0	0	1	38	2.17	85.64	1.85839	3.59	0.077903
219	0	0	0	71	0	IP	0	0	0	1	0	0	0	0	0	0	0	0	36.7	0	0.06	2213	1	65	0	0	3.19	100.9	3.07	97.2	2.57	83.7	85.4	0	0	0	1	4	0	0	0	0	1	37.33	1.47	81.36	1.19599	15.97	0.234759
220	0	0	0	72	0	IPF	0	0	0	0	1	0	0	0	0	0	0	0	36.6	0	0.18	653	1	100	0	1	1.71	53.9	1.72	54.3	1.72	100	70.4	0	0	0	1	3	0	0	1	1	1	51.33	2.49	73.97	1.84185	19.14	0.476586
221	0	0	0	32	1	OP	0	0	0	0	0	0	0	1	0	0	0	0	37	0	1	140	0	87	0	0	3.85	124.2	3.8	122.6	2.82	74.2	82.1	0	0	0	1	1	1	1	0	0	0	38.67	3.8	78.65	2.9887	20.55	0.7809
222	0	0	0	74	1	infection	0	0	0	0	0	1	0	0	0	0	0	0	37	0	0.29	350	0	84	0	0	2.73	116.7	2.74	117.1	2.01	73.4		0	0	0	1	4	0	0	0	1	0	36	7.65	31.12	2.38068	10.63	0.813195
223	0	0	0	68	1	infection	0	0	0	0	0	1	0	0	0	0	0	2	35.9	0	5.63	235	0	62	0	0								1	0	0	1	5	0	0	0	0	0	43.33	1.96	42.27	0.828492	17.61	0.345156
224	0	0	0	67	0	other	1	0	0	0	0	0	0	0	0	0	0	0	36.6	0	0.53	403	0	91	0	0	3.04	95.3	3	94	2.4	80		0	0	0	1	2	1	1	0	0	1	19.33	0.91	96.87	0.881517	1.63	0.014833
226	0	0	0	34	0	sarcoidosis	0	0	0	0	0	0	1	0	0	0	0	0	36.6	0	0.07	166	0	93	0	0	4.7	114.1	4.72	114.6	3.49	73.9	127.6	0	0	0	1	4	0	0	0	0	0	43.33	3.82	97.55	3.72641	1.01	0.038582
227	0	0	0	74	1	CVDIP	0	0	0	0	0	0	0	0	0	1	0	0	36.6	0	0.02	1902	1	81	0	1	1.55	75.2	1.48	71.8	1.23	83.1	66.1	0	0	0	1	4	0	0	0	0	0	24	4.48	42.25	1.8928	56.41	2.52717
228	0	0	0	66	1	EP	0	1	0	0	0	0	0	0	0	0	0		36.3	0	0.03	124	0	72	0	0	2.31	97.9	2.05	86.9	1.28	62.4	129.3	0	0	0	1	2	0	0	0	0	0	54	2.06	90.24	1.85894	4.45	0.09167
229	0	0	0	62	1	EP	0	1	0	0	0	0	0	0	0	0	0	0	38.5	1	9.9	311	0	72	0	0	2.73	117.2	2.73	117.2	2	73.3	97.4	0	0	0	1	2	1	3	0	0	0	48	9.03	45.42	4.10143	3.31	0.298893
230	0	0	0	74	0	CVDIP	0	0	0	0	0	0	0	0	0	1	0	0	36.9	0	6.69	371	0	57	1	0	3.81	111.4	3.81	111.4	2.79	73.2	103.4	0	0	0	1	2	1	2	0	1	0	56.67	4.04	73.05	2.95122	19.73	0.797092
231	0	0	0	71	1	IP	0	0	0	1	0	0	0	0	0	0	0	0	36.7	0	0.76	2830	1	70	0	1	1.03	46.4	0.93	41.9	0.8	86		0	0	0	1	4	0	0	0	1	0	28	2.35	66.39	1.56017	11.71	0.275185
232	0	0	0	81	1	sarcoidosis	0	0	0	0	0	0	1	0	0	0	0	0	36.5	0	0.17	383	0	84	0	0	1.84	83.3	1.78	80.5	1.16	65.2	100.5	0	0	0	1	3	0	0	0	0	0	46.67	2.97	80.8	2.39976	15.34	0.455598
235	0	0	0	58	0	IP	0	0	0	1	0	0	0	0	0	0	0	0	36.6	0	0.28	1073	1	83	0	0	2.78	79.2	2.85	81.2	2.42	84.9	75.3	0	0	0	1	4	0	0	1	0	1	36.67	5.8	94.31	5.46998	3.95	0.2291
236	1	0	1	84	0	other	1	0	0	0	0	0	0	0	0	0	0	0	36.9	0	3.19	292	0	83	0	1	2.62	84.8	2.62	84.8	2.17	82.8	84.5	0	0	0	1	4	1	2	0	1	1	30	6.61	26.16	1.72918	40.06	2.64797
237	0	0	0	19	1	other	1	0	0	0	0	0	0	0	0	0	0	0	36.5	0	0.03	302	0	83	0	1	2.16	70.6	2.07	67.6	1.68	81.2	87.8	0	0	0	1	3	0	0	0	0	0	11.33	0.95	34.3	0.32585	27.4	0.2603
238	0	0	0	77	0	infection	0	0	0	0	0	1	0	0	0	0	0	0	37.6	0	16.66	271	0	65	0	0								0	0	0	1	3	1	3	0	0	1	30	0.27	78.39	0.211653	19.29	0.052083
239	0	0	0	82	0	IPF	0	0	0	0	1	0	0	0	0	0	0	0	36.8	0	0.12	248	0	90	0	1	1.96	60.1	2.18	66.9	1.69	77.5		0	0	0	1	2	0	0	1	1	0	18	1.7	88	1.496	6.3	0.1071
240	0	0	0	68	1	sarcoidosis	0	0	0	0	0	0	1	0	0	0	0	0	36.2	0	0.24	438	0	94	0	0								0	0	0	1	3	0	0	0	0	0	63.33	2.19	87.86	1.92413	8.63	0.188997
241	0	0	0	35	1	CVDIP	0	0	0	0	0	0	0	0	0	1	0	0	37	0	1.15	2009	1	88	0	0								0	0	0	1	4	0	0	0	0	0	47.33	5.03	54.89	2.76097	23.1	1.16193
242	0	0	0	85	1	sarcoidosis	0	0	0	0	0	0	1	0	0	0	0	0	37	0	0.35	779	1	76	0	0								0	0	0	1	5	0	0	0	0	0	45.33	1.59	46.97	0.746823	52.18	0.829662
243	0	0	0	64	1	CVDIP	0	0	0	0	0	0	0	0	0	1	0	0	37.3	0	12.33	450	0	80	0	1	2.25	94.9	2.3	97	1.68	73	113.6	0	0	0	1	3	1	2	0	1	0	32	9.56	14.05	1.34318	16.07	1.53629
244	0	0	0	78	1	sarcoidosis	0	0	0	0	0	0	1	0	0	0	0	0	36.1	0	0.03	274	0	71	0	0	1.93	92.3	1.94	92.8	1.45	74.7	94.6	0	0	0	0	0	0	0	1	0	0	46.67	0.45	85.59	0.385155	13.24	0.05958
245	0	0	0	65	0	infection	0	0	0	0	0	1	0	0	0	0	0	0	36.2	0	0.35	163	0	94	0	0	2.83	83.7	2.61	77.2	1.89	72.4		0	0	0	1	1	0	0	0	0	0	44	3.35	90.9	3.04515	7.51	0.251585
246	0	0	0	75	0	CVDIP	0	0	0	0	0	0	0	0	0	1	0	0	35.6	0	0.03	682	1	106	0	0	1.97	65.9	2.03	67.9	1.23	60.6	81.5	0	0	0	1	1	0	0	1	1	0	22	1.51	92.14	1.39131	7.2	0.10872
247	0	0	0	77	0	OP	0	0	0	0	0	0	0	1	0	0	0	0	36	0	11.25	274	0	88	0	0	2.36	74.2	2.18	68.6	1.71	78.4	83.1	0	0	0	1	1	1	1	0	0	0	50	1.01	77.77	0.785477	20.52	0.207252
248	0	0	0	44	0	HP	0	0	1	0	0	0	0	0	0	0	0	0	36.8	0	0.5	861	1	95	0	1	3.75	95.4	3.52	89.6	3.01	85.5	60.7	1	0	0	1	3	0	0	0	0	1	46.67	2.79	96.47	2.69151	1.22	0.034038
249	0	0	0	71	1	IP	0	0	0	1	0	0	0	0	0	0	0	2	36.2	0	1.06	4362	1	73	0	0	1.72	74.5	1.63	70.6	1.42	87.1	66.6	0	0	0	1	4	1	1	0	0	0	75.33	2.23	73.8	1.64574	23.45	0.522935
250	0	0	0	26	1	other	1	0	0	0	0	0	0	0	0	0	0	0	36.3	0	1.04	381	0	102	0	0								0	0	0	1	1	1	3	0	1	0	56.67	3.21	57.24	1.8374	37.61	1.20728
251	0	0	0	32	0	sarcoidosis	0	0	0	0	0	0	1	0	0	0	0	0	36.3	0	0.18	689	1	81	0	0	3.4	81.7	3.46	83.2	2.65	76.6	83.2	0	0	0	1	5	0	0	0	0	0	66	3.8	77.15	2.9317	22.79	0.86602
252	0	0	0	58	0	OP	0	0	0	0	0	0	0	1	0	0	0	0	36.4	0	5.3	348	0	78	0	0	2.56	75.3	2.61	76.8	1.67	64		0	0	0	1	1	1	3	0	0	0	59.33	4.26	71.32	3.03823	28.44	1.21154
253	0	0	0	63	0	OP	0	0	0	0	0	0	0	1	0	0	0	0	36.5	0	1.4	2367	1	63	0	1	2.41	75.1	2.35	73.2	1.86	79.1	63.6	0	0	0	1	4	0	0	0	0	0	46.67	8.89	16.61	1.47663	74.85	6.65417
254	0	0	0	76	1	sarcoidosis	0	0	0	0	0	0	1	0	0	0	0	0	36.2	0	0.12	232	0	83	0	0	1.57	70.7	1.44	64.9	1.06	73.6		0	0	0	1	4	0	0	0	0	0	11.33	1.61	75.88	1.22167	22.48	0.361928
255	0	0	0	61	1	sarcoidosis	0	0	0	0	0	0	1	0	0	0	0	0	36.5	0	0.7	339	0	67	0	0	2.3	98.3	1.92	82.1	0.78	40.6	91.3	0	0	0	1	4	0	0	0	0	0	13.33	0.73	62.98	0.459754	16.88	0.123224
256	0	0	0	55	1	CVDIP	0	0	0	0	0	0	0	0	0	1	0	0	37	0	0.98	800	1	79	0	1	1.22	50.2	1.25	51.4	0.93	74.4	47.7	0	0	0	1	2	0	0	0	1	0	42	2.04	85.6	1.74624	6.8	0.13872
257	0	0	0	71	1	CVDIP	0	0	0	0	0	0	0	0	0	1	0	0	35.7	0	0.08	591	1	101	0	0	1.94	82.6	1.97	83.8	1.73	87.8	66.7	0	0	0	1	3	0	0	0	1	1	58	3.3	75.23	2.48259	25.78	0.85074
258	0	0	0	65	1	other	1	0	0	0	0	0	0	0	0	0	0	0	36.9	0	0.16	327	0	85	0	0	2.37	105.8	2.37	105.8	2.08	87.8		0	0	0	1	3	1	1	0	0	0	16.67	8.43	5.18	0.436674	3.41	0.287463
259	0	0	0	63	0	lymphopro	0	0	0	0	0	0	0	0	1	0	0	0	35.6	0	0.48	476	0	96	0	0	3.32	96.2	3.48	100.9	2.9	83.3	67.6	0	0	0	1	4	0	0	0	0	1	51.33	5.05	74.58	3.76629	8.66	0.43733
260	0	0	0	74	1	IP	0	0	0	1	0	0	0	0	0	0	0	0	36.6	0	0.06	548	1	94	0	0	2.58	119.4	2.62	121.3	2.26	86.3	118.6	0	0	0	1	4	0	0	0	0	0	27.33	2.15	87.87	1.88921	5.22	0.11223
261	0	0	0	45	0	EP	0	1	0	0	0	0	0	0	0	0	0	0	36.7	0	0.64	130	0	82	0	0	3.58	98.4	3.4	93.4	2.12	62.4	108	0	0	0	0	0	1	1	0	0	0	55.33	10.09	13.38	1.35004	1.48	0.149332
262	0	0	0	40	1	sarcoidosis	0	0	0	0	0	0	1	0	0	0	0	0	36.7	0	0.26	303	0	104	0	0	2.92	106.2	2.82	102.5	2.2	78	103.1	0	0	0	1	4	0	0	0	0	0	64	4.17	54.73	2.28224	44.75	1.86607
263	0	0	0	79	1	other	1	0	0	0	0	0	0	0	0	0	0	0	36.5	0	0.1	262	0	91	0	0								0	0	0	1	2	0	0	0	0	0	56	1.2	94.95	1.1394	1.44	0.01728
265	0	0	0	43	0	HP	0	0	1	0	0	0	0	0	0	0	0	0	36.8	0	7.09	229	0	64	0	0	2.85	73.8	2.72	70.5	2.26	83.1		0	0	0	1	5	0	0	0	0	0	41.33	3.23	29.43	0.950589	53	1.7119
266	0	0	0	75	0	IP	0	0	0	1	0	0	0	0	0	0	0	0	36	0	0.4	1478	1	91	0	0	1.65	51.7	1.73	54.2	1.4	80.9	91.3	0	0	0	1	4	0	0	0	1	0	26.67	2.02	84.31	1.70306	7.43	0.150086
267	0	0	0	72	1	IP	0	0	0	1	0	0	0	0	0	0	0	0	35.6	0	0.1	988	1	82	0	0	2.26	95.4	2.31	97.5	2.27	98.3	66.4	0	0	0	1	5	0	0	0	1	0	66.67	2.66	90.07	2.39586	6.56	0.174496
268	0	0	0	80	0	IP	0	0	0	1	0	0	0	0	0	0	0		35.9	0	0.2	1408	1	77	0	1	2.68	81.5	2.69	81.8	2.11	78.4	41.6	1	0	0	1	2	1	1	1	1	1	44	2.21	71.9	1.58899	14.9	0.32929
269	0	0	0	81	1	HP	0	0	1	0	0	0	0	0	0	0	0	0	36.9	0	0.53	748	1	94	0	0	2.59	117.7	2.64	120	1.96	74.2	72.7	0	0	0	1	3	1	1	0	1	0	46.67	0.86	87.6	0.75336	6.81	0.058566
271	0	0	0	50	0	other	1	0	0	0	0	0	0	0	0	0	0	0	36.7	0	0.03	380	0	82	0	0	3.85	104.1	3.78	102.2	2.87	75.9	101.5	0	0	0	1	3	0	0	0	0	0	48	2.31	76.65	1.77062	21.18	0.489258
272	0	0	0	67	1	IP	0	0	0	1	0	0	0	0	0	0	0	0	36.6	0	0.2	1630	1	70	0	1	1.87	77.3	1.86	76.9	1.72	92.5	46.7	0	0	0	1	4	0	0	0	1	0	15.33	3.37	76.32	2.57198	0	0
274	0	0	0	25	1	sarcoidosis	0	0	0	0	0	0	1	0	0	0	0	0	36.2	0	0.01			102	0	0	3.56	121.1	3.66	124.5	2.75	75.1	93.8	0	0	0	1	4	0	0	0	0	0	66.67	1.73	64.31	1.11256	34.99	0.605327
275	0	0	0	50	1	OP	0	0	0	0	0	0	0	1	0	0	0	0	36.6	0	0.02	338	0	132	0	0								0	0	0	1	2	1	2	0	0	0	32.67	1.22	91.49	1.11618	6.74	0.082228
276	0	0	0	75	1	HP	0	0	1	0	0	0	0	0	0	0	0	0	36.2	0	0.24	781	1	58	1	1	1.73	73.9	1.66	70.9	1.32	79.5	52.5	0	0	0	1	5	1	1	0	1	0	26.67	1.37	84.83	1.16217	4.75	0.065075
277	0	0	0	82	1	CVDIP	0	0	0	0	0	0	0	0	0	1	0	0	36	0	0.23	449	0	82	0	0	1.63	71.8	1.51	66.5	1.28	84.8		0	0	0	1	3	0	0	0	1	0	38.67	2.21	91.23	2.01618	6.06	0.133926
278	0	0	0	67	0	IP	0	0	0	1	0	0	0	0	0	0	0	0	36.3	0	3.23	687	1	89	0	0								0	0	0	1	1	1	3	0	0	0	9.33	7.36	23	1.6928	57	4.1952
279	0	0	0	55	1	HP	0	0	1	0	0	0	0	0	0	0	0	0	35.9	0	0.07	7015	1	60	1	1	2.19	87.3	2.19	87.3	1.83	83.6	57.1	0	0	0	1	5	0	0	0	0	0	48	12.49	8.93	1.11536	88.47	11.0499
280	0	0	0	68	0	sarcoidosis	0	0	0	0	0	0	1	0	0	0	0	0	36.9	0	0.23	600	1	97	0	1	2.5	75.8	2.47	74.8	2.37	96	77.4	0	0	0	1	4	0	0	1	1	1	59.33	3.01	58.54	1.76205	34.98	1.0529
281	0	0	0	70	1	IP	0	0	0	1	0	0	0	0	0	0	0	0	36.8	0	0.15	617	1	96	0	0	2.49	118	2.49	118	2.06	82.7	116.4	0	0	0	1	3	1	1	0	0	0	48.67	1.03	93.04	0.958312	5.42	0.055826
282	0	0	0	73	0	CVDIP	0	0	0	0	0	0	0	0	0	1	0	0	36.3	0	2.36	2446	1	79	0	0	2.45	77.5	2.41	76.3	1.9	78.8	98.6	0	0	0	1	3	0	0	0	0	1	31.33	7.14	48.1	3.43434	48.14	3.4372
283	0	0	0	62	0	IP	0	0	0	1	0	0	0	0	0	0	0	0	37	0	0.14	863	1	71	0	0	3.34	100.3	3.3	99.1	2.13	64.5	100.1	0	0	0	1	2	0	0	0	0	0	40.67	10.87	24.16	2.62619	75.09	8.16228
284	0	0	0	53	1	sarcoidosis	0	0	0	0	0	0	1	0	0	0	0	0	36.2	0	0.07	444	0	90	0	1								0	0	0	1	4	0	0	0	0	0	58	1.29	68.73	0.886617	30.99	0.399771
285	0	0	0	24	0	sarcoidosis	0	0	0	0	0	0	1	0	0	0	0	0	37.2	0	0.1	362	0	94	0	0	4.49	103	4.42	101.4	3.67	83	105.7	0	0	0	1	5	0	0	0	0	0	60	4.35	80.99	3.52306	16.78	0.72993
286	0	0	0	73	0	IP	0	0	0	1	0	0	0	0	0	0	0	0	36.3	0	0.03	412	0	77	0	0	4.46	127.4	4.39	125.4	3.24	73.8	102.2	0	0	0	1	2	0	0	1	0	1	38.67	5.07	95.62	4.84793	1.34	0.067938
287	0	0	0	59	0	other	1	0	0	0	0	0	0	0	0	0	0	0	36.8	0	2.21	220	0	95	0	0	1.91	56.3	1.84	54.3	1.84	100	80.5	1	0	0	1	5	0	0	0	1	0	29.33	1.97	88.46	1.74266	9.65	0.190105
288	0	0	0	50	0	other	1	0	0	0	0	0	0	0	0	0	0	0	36.6	0	0.36	143	0	81	0	0	5.01	129.8	5.11	132.4	3.45	67.5	127.3	0	0	0	0	0	1	1	0	0	1	32	1.51	97.15	1.46697	1.85	0.027935
289	0	0	0	69	0	IP	0	0	0	1	0	0	0	0	0	0	0	0	36.1	0	0.16	456	0	66	0	1	1.71	52.5	1.64	50.3	0.87	53		0	0	0	1	4	0	0	0	0	0	52	1.97	71.49	1.40835	26.88	0.529536
290	0	0	0	80	1	sarcoidosis	0	0	0	0	0	0	1	0	0	0	0	0	36.7	0	0.32	505	1	76	0	0								0	0	0	1	3	0	0	0	0	0	52	1.18	93.48	1.10306	4.97	0.058646
291	0	0	0	66	0	IP	0	0	0	1	0	0	0	0	0	0	0	0	35.4	0	0.05	1404	1	85	0	0	3.23	93.9	3.24	94.2	2.54	78.4	82.3	0	0	0	1	2	1	2	0	0	0	37.33	2.99	93.38	2.79206	5.63	0.168337
292	0	0	0	67	1	other	1	0	0	0	0	0	0	0	0	0	0	0	36.1	0	0.04	286	0	93	0	0	2.19	95.2	2.11	91.7	1.44	68.2		1	1	0	1	3	1	2	0	0	0	47.33	1.04	95.94	0.997776	2.99	0.031096
295	0	0	0	70	0	IP	0	0	0	1	0	0	0	0	0	0	0	0	35.9	0	0.08	994	1	81	0	0	3.18	99.4	3.23	100.9	2.21	68.4	112.5	0	0	0	1	2	0	0	0	0	0	34.67	2.56	14.41	0.368896	83.33	2.13325
296	0	0	0	85	0	EP	0	1	0	0	0	0	0	0	0	0	0	0	36.1	0	2.58	485	0	73	0	1	2.22	70.7	2.24	71.3	1.75	78.1		0	0	0	1	1	1	3	0	0	0	42	4.24	59.27	2.51305	10.82	0.458768
297	0	0	0	75	0	other	1	0	0	0	0	0	0	0	0	0	0	2	35.9	0	2.29	320	0	82	0	0	3.2	100.9	3.11	98.1	2.63	84.6	92.6	0	0	0	1	4	0	0	0	1	0	33.33	3.06	88.6	2.71116	4.8	0.14688
298	0	0	0	23	0	sarcoidosis	0	0	0	0	0	0	1	0	0	0	0	0	36.7	0	0.06			92	0	0	4.22	101.4	4.19	100.7	3.92	93.6	104.6	0	0	0	1	4	0	0	0	0	0	52	1.55	45.23	0.701065	53.71	0.832505
299	0	0	0	51	1	sarcoidosis	0	0	0	0	0	0	1	0	0	0	0	0	36.8	0	0.17	232	0	93	0	0	3.32	121.2	3.27	119.3	2.43	74.3	92.6	0	0	0	1	4	0	0	0	0	0	54	2.94	46.74	1.37416	46.02	1.35299
300	0	0	0	60	0	sarcoidosis	0	0	0	0	0	0	1	0	0	0	0	0	36.1	0	0.11	1576	1	73	0	1	2.02	57.7	2.03	58	1.67	82.3	53.5	0	0	0	1	5	0	0	0	0	0	44	6.02	28.62	1.72292	69.66	4.19353
301	0	0	0	69	1	HP	0	0	1	0	0	0	0	0	0	0	0	0	35.9	0	0.06	278	0	82	0	0	2.03	98.1	2.03	98.1	1.73	85.2	88.7	0	0	0	1	2	0	0	1	0	0	22	1.3	90.62	1.17806	3.41	0.04433
302	0	0	0	67	1	IP	0	0	0	1	0	0	0	0	0	0	0	0	36.9	0	0.02	400	0	92	0	1	2.03	87.1	1.98	85	1.84	92.9		0	0	0	1	4	0	0	0	0	0	41.33	2.37	93.44	2.21453	3.88	0.091956
303	0	0	0	75	1	OP	0	0	0	0	0	0	0	1	0	0	0	0	36.4	0	2.5	381	0	79	0	0	2.24	103.2	2.29	105.5	1.83	79.9	102.4	1	1	0	1	2	0	0	0	0	0	40	2.78	94.35	2.62293	1.32	0.036696
304	0	0	0	78	0	HP	0	0	1	0	0	0	0	0	0	0	0	0	36.5	0	0.09	3496	1	72	0	1	2.89	90.9	2.77	87.1	1.92	69.3	56.4	0	0	0	1	4	0	0	0	1	0	44	8.24	19.56	1.61174	74.64	6.15034
305	0	0	0	79	1	other	1	0	0	0	0	0	0	0	0	0	0	0	36.4	0	3.36	850	1	71	0	0	1.65	72.4	1.76	77.2	1.52	86.4	100.3	0	0	0	1	3	1	2	0	1	0	28	19.53	1.64	0.320292	6.32	1.2343
307	0	0	0	49	0	DRUG	0	0	0	0	0	0	0	0	0	0	1		36.6	0	2	205	0	89	0	0								0	0	0	1	2	0	0	0	0	0	44	0.88	48.67	0.428296	26.02	0.228976
309	0	0	0	66	1	CVDIP	0	0	0	0	0	0	0	0	0	1	0	0	36.3	0	0.59	270	0	69	0	0								0	0	0	1	3	0	0	0	1	0	49.33	4.31	89.81	3.87081	7.4	0.31894
311	0	0	0	77	1	IP	0	0	0	1	0	0	0	0	0	0	0	0	36.7	0	0.18	491	0	108	0	1	2.76	118.5	2.71	116.3	2.17	80.1	65.5	0	0	0	1	4	0	0	0	1	0	54.67	1.29	87.09	1.12346	10.25	0.132225
312	0	0	0	68	0	CVDIP	0	0	0	0	0	0	0	0	0	1	0	0	36.7	0	0.44	1201	1	81	0	0	2.55	77	2.54	76.7	2.09	82.3	66.9	0	0	0	1	1	0	0	1	0	1	31.33	1.84	87.48	1.60963	9.76	0.179584
313	0	0	0	52	1	OP	0	0	0	0	0	0	0	1	0	0	0	0	37.1	0	0.22	349	0	94	0	1	2.73	105.4	2.73	105.4	2.13	78	89.6	0	0	0	1	2	1	1	0	0	0	54.67	5.93	12.97	0.769121	85.96	5.09743
314	0	0	0	70	0	IP	0	0	0	1	0	0	0	0	0	0	0	0	36.4	0	0.12	303	0	59	1	0	1.29	40.6	1.2	37.7	0.85	70.8		0	0	0	0	0	1	1	1	0	0	22	2.36	89.05	2.10158	3.3	0.07788
315	0	0	0	39	1	other	1	0	0	0	0	0	0	0	0	0	0		36.9	0	0.03	407	0	92	0	1	3.22	114.2	3.32	117.7	2.83	85.2	92.5	0	0	0	1	3	0	0	0	0	0	47.33	2.34	97.84	2.28946	0.64	0.014976
317	0	0	0	64	1	CVDIP	0	0	0	0	0	0	0	0	0	1	0	2	35.4	0	0.07	4632	1	61	0	1								0	0	0	1	3	0	0	0	0	0	28	6.07	40.54	2.46078	46.86	2.8444
318	0	0	0	56	1	sarcoidosis	0	0	0	0	0	0	1	0	0	0	0	0	35.9	0	0.14	134	0	104	0	0	3.14	125.6	3.21	128.4	2.6	81	91.2	0	0	0	1	1	0	0	0	0	0	28.67	0.8	54.53	0.43624	43.84	0.35072
319	0	0	0	74	0	CVDIP	0	0	0	0	0	0	0	0	0	1	0	0	36.5	0	0.14	463	0	86	0	1	2.73	81.3	2.68	79.8	2.15	80.2	77.9	0	0	0	1	3	0	0	0	1	1	39.33	7.48	94.12	7.04018	1.48	0.110704
320	0	0	0	57	1	IP	0	0	0	1	0	0	0	0	0	0	0	0	36.4	0	0.3	254	0	103	0	1	2.19	90.5	2.2	90.9	1.98	90	91.8	0	0	0	0	0	1	2	0	1	0	35.33	1.95	91.56	1.78542	2.3	0.04485
322	0	0	0	72	0	lymphopro	0	0	0	0	0	0	0	0	1	0	0	0	36.3	0	6.99	257	0	65	0	1								0	0	0	1	2	1	2	0	0	0	26	3.1	78.85	2.44435	19.01	0.58931
323	0	0	0	67	0	IP	0	0	0	1	0	0	0	0	0	0	0	0	36.4	0	0.1	1112	1	80	0	1	2.21	64.8	2.09	61.3	1.77	84.7	72	0	0	0	1	5	0	0	0	0	1	18	3.65	87.59	3.19704	6	0.219
324	0	0	0	79	0	CVDIP	0	0	0	0	0	0	0	0	0	1	0	0	36.7	0	0.13	1070	1	105	0	0	3.11	100.3	3.11	100.3	2.4	77.2	89	0	0	0	1	2	0	0	0	1	1	28.67	2.91	78.57	2.28639	5.23	0.152193
325	0	0	0	71	1	other	1	0	0	0	0	0	0	0	0	0	0	0	36.4	0	0.02	211	0	82	0	0	2.12	96.8	2.15	98.2	1.55	72.1	107.8	0	0	0	1	3	0	0	0	0	0	42.67	1.53	49.8	0.76194	48.13	0.736389
326	0	0	0	65	0	IP	0	0	0	1	0	0	0	0	0	0	0	0	36.5	0	0.6	12385	1	63	0	1	2.89	85	2.73	80.3	2.41	88.3	64.4	0	0	0	1	5	0	0	0	0	0	46	14.11	15.31	2.16024	83.58	11.7931
327	0	0	0	64	0	IP	0	0	0	1	0	0	0	0	0	0	0	0	36.6	0	0.22	2409	1	92	0	0	3.46	101.2	3.47	101.5	2.83	81.6	74.1	0	0	0	1	4	1	1	1	1	0	46	5.04	58.58	2.95243	40.18	2.02507
328	0	0	0	79	0	IP	0	0	0	1	0	0	0	0	0	0	0	0	36.3	0	0.07	986	1	75	0	0	2.7	84.9	2.35	73.9	1.95	83	84.1	0	0	0	1	2	0	0	0	1	0	48	3.56	45.98	1.63689	50.6	1.80136
329	0	0	0	72	0	IP	0	0	0	1	0	0	0	0	0	0	0	0	36.5	0	0.09	2016	1	92	0	1	2.86	87.2	2.83	86.3	2.19	77.4	80.8	0	0	0	0	0	0	0	1	0	1	30.67	1.56	93.99	1.46624	1.02	0.015912
330	0	0	0	69	1	OP	0	0	0	0	0	0	0	1	0	0	0	0	37	0	6.7	997	1	62	0	0	1.93	84.6	1.84	80.7	1.4	76.1	58.4	0	0	0	0	0	1	4	0	0	1	42	3.33	88.67	2.95271	5.59	0.186147
332	0	0	0	61	1	OP	0	0	0	0	0	0	0	1	0	0	0	0	36.3	0	1.19	408	0	64	0	0	2.42	97.6	2.27	91.5	1.86	81.9	83.8	0	0	0	1	3	1	1	0	0	0	61.33	1.88	99.02	1.86158	1.89	0.035532
333	0	0	0	78	1	IP	0	0	0	1	0	0	0	0	0	0	0	1	36.8	0	1.53	896	1	76	0	0	1.23	56.9	1.25	57.9	1.08	86.4		0	0	0	1	5	0	0	0	1	0	31.33	1.91	80.93	1.54576	7.87	0.150317
334	0	0	0	80	1	IP	0	0	0	1	0	0	0	0	0	0	0	0	36.2	0	0.64	1349	1	73	0	0	1.94	85.5	1.9	83.7	1.5	78.9		0	0	0	1	2	0	0	1	0	0	31.33	1.39	86.43	1.20138	4.46	0.061994
337	0	0	0	52	1	sarcoidosis	0	0	0	0	0	0	1	0	0	0	0	0	36	0	0.04			83	0	0	2.89	112.9	2.81	109.8	1.25	44.5	116.9	0	0	0	1	1	1	1	0	0	0	52.67	0.66	87.46	0.577236	7.24	0.047784
338	0	0	0	60	1	IP	0	0	0	1	0	0	0	0	0	0	0	1	36.6	0	0.04	3831	1	86	0	1	2.2	97.3	2.18	96.5	1.86	85.3	53.7	0	0	0	1	3	0	0	0	0	0	46.67	2.4	51.31	1.23144	45.24	1.08576
339	0	0	0	74	1	OP	0	0	0	0	0	0	0	1	0	0	0	0	36.2	0	4.56	431	0	84	0	0	1.23	55.4	1.14	51.4	1.04	91.2		0	0	0	1	2	1	2	0	0	0	22.67	14.85	35.49	5.27027	51.98	7.71903
342	0	0	0	77	0	IP	0	0	0	1	0	0	0	0	0	0	0	2	37	0	0.53	742	1	63	0	0	3.03	96.5	2.94	93.6	1.57	53.4	115	0	0	0	1	4	1	1	0	0	1	53.33	8.57	46.13	3.95334	7.31	0.626467
343	0	0	0	71	0	IP	0	0	0	1	0	0	0	0	0	0	0	2	36.5	0	0.58	3685	1	77	0	1	2.13	67.8	2.1	66.9	1.84	87.6		0	0	0	1	5	0	0	0	1	0	33.33	2.3	69.51	1.59873	21.28	0.48944
344	0	0	0	54	0	IP	0	0	0	1	0	0	0	0	0	0	0	0	36.7	0	0.04	1268	1	99	0	0	3.38	96	3.44	97.7	2.93	85.2	132.4	1	0	0	1	2	0	0	0	0	1	61.33	1.95	91.06	1.77567	8.44	0.16458
346	0	0	0	61	0	OP	0	0	0	0	0	0	0	1	0	0	0	0	37	0	1.12	2214	1	84	0	0	2.73	80.5	2.8	82.6	2.31	82.5	80.6	0	0	0	1	4	0	0	0	0	0	46	16.5	7.93	1.30845	88.87	14.6636
347	0	0	0	59	1	other	1	0	0	0	0	0	0	0	0	0	0	0	36.7	0	0.08	394	0	68	0	0	2.34	96.7	2.04	84.3	1.31	64.2	127.8	0	0	0	1	4	0	0	0	0	0	52	6.36	31.73	2.01803	5.91	0.375876
348	0	0	0	55	1	other	1	0	0	0	0	0	0	0	0	0	0	0	36.4	0	0.27	279	0	82	0	0								0	0	0	1	3	1	1	0	0	0	42	4.77	33.07	1.57744	59.3	2.82861
349	0	0	0	78	0	IP	0	0	0	1	0	0	0	0	0	0	0	0	36.5	0	0.02	531	1	92	0	1	2.47	81.3	2.54	83.6	2.23	87.8	116.1	0	0	0	1	4	0	0	1	1	1	32	6.84	68.79	4.70524	12.2	0.83448
350	0	0	0	71	0	sarcoidosis	0	0	0	0	0	0	1	0	0	0	0	0	36.3	0	0.35	484	0	77	0	0	2.86	90.5	2.67	84.5	2.01	75.3		0	0	0	1	1	1	1	0	0	0	22.67	1.2	70.67	0.84804	28.26	0.33912
351	0	0	0	25	0	sarcoidosis	0	0	0	0	0	0	1	0	0	0	0	0	36.7	0	0.39	577	1	104	0	0	4.29	102.9	4.28	102.6	3.43	80.1	100.5	0	0	0	1	3	0	0	0	0	0	62.67	4.75	73.33	3.48318	26.32	1.2502
352	0	0	0	82	1	sarcoidosis	0	0	0	0	0	0	1	0	0	0	0	1	36.6	0	0.06	572	1	71	0	0								0	0	0	1	2	0	0	0	0	0	63.33	2.95	59.37	1.75142	40.52	1.19534
353	0	0	0	83	1	IP	0	0	0	1	0	0	0	0	0	0	0	2	36	0	0.04	2332	1	91	0	1	2.22	98.7	2.06	91.6	1.7	82.5		0	0	0	1	2	0	0	0	1	1	62	2.61	81.71	2.13263	12.81	0.334341
354	0	0	0	74	1	infection	0	0	0	0	0	1	0	0	0	0	0	3	37	0	1.32	1127	1	57	1	1								0	0	0	1	5	0	0	0	1	0	48	3.52	78.59	2.76637	14.16	0.498432
355	0	0	0	75	0	IP	0	0	0	1	0	0	0	0	0	0	0	0	36.3	0	0.06	288	0	91	0	0	3.55	107.9	3.41	103.6	2.5	73.3	94.5	0	0	0	1	2	0	0	0	0	0	40	1.98	86.39	1.71052	12.09	0.239382
356	0	0	0	76	1	CVDIP	0	0	0	0	0	0	0	0	0	1	0	0	38	1	12.63	145	0	99	0	0	1.63	74.8	1.52	69.7	1.12	73.7		0	0	0	0	0	1	4	0	0	0	72	1.41	90.26	1.27267	3.93	0.055413
357	0	0	0	69	1	CVDIP	0	0	0	0	0	0	0	0	0	1	0	0	37.3	0	2.64	756	1	60	1	0	0.9	42.9	0.74	35.2	0.72	97.3		1	0	0	1	5	0	0	0	1	0	35.33	1.09	54.51	0.594159	17.89	0.195001
359	0	0	0	82	0	other	1	0	0	0	0	0	0	0	0	0	0	0	35.3	0	0.2	455	0	80	0	1								0	0	0	1	1	1	1	0	0	0	20.67	1.96	82.65	1.61994	3.52	0.068992
360	0	0	0	76	1	DRUG	0	0	0	0	0	0	0	0	0	0	1		36.8	0	0.08	3203	1	75	0	1	1.37	60.1	1.43	62.7	1.13	79	49.2	0	0	0	1	4	0	0	0	0	0	27.33	4.9	37.68	1.84632	61.76	3.02624
362	0	0	0	81	1	sarcoidosis	0	0	0	0	0	0	1	0	0	0	0		36.7	0	0.26	602	1	73	0	0								0	0	0	1	3	0	0	0	0	0	51.33	2.48	58.73	1.4565	40.19	0.996712
363	0	0	0	62	1	CVDIP	0	0	0	0	0	0	0	0	0	1	0	0	35.8	0	0.24	396	0	95	0	0	2.15	87.8	2.15	87.8	1.77	82.3	77.5	0	0	0	1	2	0	0	0	0	0	64.67	2.25	90.54	2.03715	8.12	0.1827
364	0	0	0	64	1	sarcoidosis	0	0	0	0	0	0	1	0	0	0	0	0	36.2	0	0.06	7353	1	91	0	1	2.09	88.2	2.1	88.6	1.67	79.5	49.6	0	0	0	1	3	0	0	0	0	0	26	1.35	55.18	0.74493	41.31	0.557685
365	0	0	0	77	0	other	1	0	0	0	0	0	0	0	0	0	0	0	37.1	0	0.09	285	0	98	0	0	3.11	98.1	3.02	95.3	2.55	84.4	103.8	0	0	0	1	2	0	0	0	0	0	66.67	1.75	91.92	1.6086	8.08	0.1414
366	0	0	0	30	1	sarcoidosis	0	0	0	0	0	0	1	0	0	0	0	0	36.3	0	0.25	515	1	81	0	0	3.71	122.4	3.67	121.1	2.63	71.7	102.1	0	0	0	1	3	0	0	0	0	0	28.67	4.95	48.18	2.38491	48.24	2.38788
367	0	0	0	72	0	OP	0	0	0	0	0	0	0	1	0	0	0	0	36.2	0	6.7	588	1	98	0	1	3.07	96.5	3.06	96.2	2.29	74.8	120.3	0	0	0	1	3	1	2	0	0	0	71.33	4.56	41.76	1.90426	33.01	1.50526
369	1	0	1	80	0	IP	0	0	0	1	0	0	0	0	0	0	0	2	37.5	0	11.95	387	0	74	0	1								1	0	0	1	4	0	0	1	0	0	42	8.09	63.73	5.15576	29.56	2.3914
370	0	0	0	40	1	other	1	0	0	0	0	0	0	0	0	0	0	0	36.7	0	0.06	196	0	77	0	1	2.81	101.8	2.79	101.1	2.12	76	98.7	0	0	0	1	1	0	0	0	0	0	17.33	1.37	52.62	0.720894	10.5	0.14385
371	0	0	0	52	1	sarcoidosis	0	0	0	0	0	0	1	0	0	0	0	0	37.1	0	0.35	398	0	75	0	0								0	0	0	1	1	0	0	0	0	0	65.33	3.4	46.53	1.58202	53.24	1.81016
372	0	0	0	74	0	OP	0	0	0	0	0	0	0	1	0	0	0	0	36.5	0	0.6	207	0	66	0	1	3.89	115.4	3.85	114.2	2.47	64.2	121.6	0	0	0	1	3	0	0	0	0	1	41.33	4.21	29.21	1.22974	63.16	2.65904
373	0	0	0	74	1	IP	0	0	0	1	0	0	0	0	0	0	0		36.6	0	0.21	1421	1	65	0	1	1.58	68.4	1.59	68.8	1.42	89.3	59.8	0	0	0	1	4	0	0	0	1	0	24.67	1.02	83.12	0.847824	7.18	0.073236
374	0	0	0	35	0	other	1	0	0	0	0	0	0	0	0	0	0	2	37	0	0.06	199	0	55	1	1	3.82	95.3	3.25	81	1.12	34.5	90.5	1	0	0	1	3	0	0	0	0	0	30	1.97	54.55	1.07464	19	0.3743
375	0	0	0	75	1	IP	0	0	0	1	0	0	0	0	0	0	0	0	36.5	0	0.09	827	1	75	0	0								0	0	0	1	2	0	0	0	0	0	49.33	2.05	49.79	1.02069	47.32	0.97006
376	0	0	0	69	1	IP	0	0	0	1	0	0	0	0	0	0	0	1	36.7	0	0.09	770	1	75	0	1	2.45	104.3	2.37	100.9	2.06	86.9	54.7	0	0	0	1	5	0	0	0	0	0	24.67	1.54	92.75	1.42835	4.15	0.06391
377	0	0	0	64	1	IP	0	0	0	1	0	0	0	0	0	0	0	0	36.1	0	0.06	925	1	79	0	0	2.53	108.6	2.52	108.2	2.07	82.1	94.7	0	0	0	1	2	0	0	0	0	0	32	1.07	82.83	0.886281	12.67	0.135569
378	0	0	0	48	0	sarcoidosis	0	0	0	0	0	0	1	0	0	0	0	0	36.3	0	0.09	480	0	78	0	0								0	0	0	1	2	0	0	0	0	0	55.33	1.62	85.04	1.37765	13.58	0.219996
380	0	0	0	53	0	IP	0	0	0	1	0	0	0	0	0	0	0	0	36.9	0	0.68	726	1	84	0	0	3.5	94.3	3.45	93	2.72	78.8	95.3	0	0	0	1	1	0	0	1	0	0	36	7.36	85.68	6.30605	9.7	0.71392
382	0	0	0	67	0	infection	0	0	0	0	0	1	0	0	0	0	0	0	37.2	0	5.98	836	1	53	1	0								0	0	0	1	2	1	3	0	0	1	10
383	0	0	0	58	1	sarcoidosis	0	0	0	0	0	0	1	0	0	0	0	0	36.7	0	0.18	845	1	80	0	0	2.22	87.1	2.2	86.3	1.81	82.3	69.4	0	0	0	1	5	0	0	0	0	0	62.67	1.15	85.73	0.985895	12.33	0.141795
384	0	0	0	56	1	sarcoidosis	0	0	0	0	0	0	1	0	0	0	0	1	36.5	0	0.08	7128	1	83	0	0	1.23	54.9	1.24	55.4	1.2	96.8	47	0	0	0	1	5	0	0	0	0	0	39.33	4.44	52.26	2.32034	34.76	1.54334
386	0	0	0	81	0	sarcoidosis	0	0	0	0	0	0	1	0	0	0	0	0	36.6	0	1.92	480	0	97	0	0	2.6	81.8	2.6	81.8	2.05	78.8		0	0	0	1	1	1	2	0	0	0	50.67	2.73	87.75	2.39558	10.85	0.296205
387	1	0	1	63	0	CVDIP	0	0	0	0	0	0	0	0	0	1	0	0	36.5	0	1.7	1436	1	84	0	1	2.74	79.7	2.71	78.8	2.17	80.1	49.3	0	0	0	1	5	0	0	0	0	1	37.33	5.42	90.69	4.9154	2.44	0.132248
388	0	0	0	52	1	OP	0	0	0	0	0	0	0	1	0	0	0	0	36.4	0	0.1	1857	1	91	0	0	2.73	103.4	2.76	104.5	2.08	75.4	62.8	0	0	0	1	1	1	2	0	1	0	50	1.64	70.03	1.14849	21.51	0.352764
390	0	0	0	61	0	HP	0	0	1	0	0	0	0	0	0	0	0	0	35.6	0	1.01	2169	1	74	0	1	3.75	106.8	3.65	104	2.82	77.3	77.5	0	0	0	1	5	0	0	0	0	0	46	6.4	27.91	1.78624	69.54	4.45056
391	0	0	0	39	0	sarcoidosis	0	0	0	0	0	0	1	0	0	0	0	0	36.3	0	0.38	274	0	104	0	0	5.28	136.1	5.2	134	4.13	79.4	113	0	0	0	1	2	0	0	0	0	0	43.33	2.03	93.71	1.90231	5.8	0.11774
393	0	0	0	80	1	sarcoidosis	0	0	0	0	0	0	1	0	0	0	0	0	36.4	0	0.89	256	0	90	0	0	1.25	62.2	1.17	58.2	0.75	64.1		1	0	0	1	2	0	0	0	0	0	41.33	0.96	88.36	0.848256	6.82	0.065472
396	0	0	0	56	0	CVDIP	0	0	0	0	0	0	0	0	0	1	0	1	35.7	0	0.18	1899	1	86	0	1	2.32	64.3	2.3	63.7	2	87	45.1	0	0	0	1	4	1	2	0	0	0	54.67	4.44	55.28	2.45443	43.02	1.91009
397	0	0	0	87	0	sarcoidosis	0	0	0	0	0	0	1	0	0	0	0	1	36.9	0	0.27	360	0	91	0	1	1.72	77.8	1.58	71.5	0.83	52.5	58.7	0	0	0	1	5	0	0	0	0	0	46	3.65	61.62	2.24913	36.2	1.3213
398	0	0	0	75	1	CVDIP	0	0	0	0	0	0	0	0	0	1	0	0	35.8	0	0.17	683	1	71	0	1	1.25	56.6	1.34	60.6	1.11	82.8		0	0	0	1	5	0	0	0	1	0	22	4.17	19.2	0.80064	41.37	1.72513
399	0	0	0	71	0	CVDIP	0	0	0	0	0	0	0	0	0	1	0	0	35.7	0	3.05	436	0	80	0	0								1	1	0	1	3	0	0	1	0	1	20.67	1.72	73.62	1.26626	6.56	0.112832
400	0	0	0	64	0	OP	0	0	0	0	0	0	0	1	0	0	0	0	36.8	0	0.03	773	1	94	0	0	3.73	111.7	3.75	112.3	3.17	84.5	120.7	0	0	0	1	3	0	0	0	0	0	54.67	2.49	17.65	0.439485	77.2	1.92228
402	0	0	0	86	0	OP	0	0	0	0	0	0	0	1	0	0	0	2	36.5	0	12.77	132	0	93	0	0	1.31	40.7	1.39	43.2	1.35	97.1		0	0	0	1	2	1	1	0	0	0	58.67	5.48	47.96	2.62821	29.47	1.61496
403	0	0	0	71	0	IPF	0	0	0	0	1	0	0	0	0	0	0	0	35.9	0	0.08	426	0	93	0	1	2.52	79	2.46	77.1	2.01	81.7	104.1	0	0	0	1	4	0	0	0	0	0	64.67	2.61	69.87	1.82361	24.1	0.62901
404	0	0	0	55	0	IP	0	0	0	1	0	0	0	0	0	0	0		36.3	0	0.15	1203	1	82	0	1	3.82	109.8	3.85	110.6	2.7	70.1	88.8	0	0	0	1	4	0	0	0	0	1	50.67	2.4	81.44	1.95456	16.16	0.38784
405	0	0	0	65	1	IP	0	0	0	1	0	0	0	0	0	0	0	0	36	0	0.02	585	1	104	0	0	1.82	79.8	1.81	79.4	1.6	88.4	57.1	0	0	0	1	2	0	0	1	0	0	20.67	2.36	89.83	2.11999	8.65	0.20414
406	0	0	0	79	1	sarcoidosis	0	0	0	0	0	0	1	0	0	0	0	0	36.3	0	0.02	860	1	83	0	0	2.24	101.4	2.35	106.3	1.92	81.7	89.4	0	0	0	1	3	0	0	0	0	0	58.67	3.37	52.7	1.77599	32.52	1.09592
407	0	0	0	54	1	sarcoidosis	0	0	0	0	0	0	1	0	0	0	0	0	36.4	0	0.61	312	0	77	0	0	3.36	125.4	3.09	115.3	2.45	79.3	94.3	0	0	0	1	2	1	2	0	0	0	72.67	1.53	87.7	1.34181	7.4	0.11322
408	0	0	0	69	1	CVDIP	0	0	0	0	0	0	0	0	0	1	0	0	35.9	0	0.04	16241	1	78	0	1	2.02	92.7	2.06	94.5	1.68	81.6	73.6	0	0	0	1	3	0	0	0	0	0	46.67	2.01	58.28	1.17143	36.08	0.725208
409	0	0	0	54	1	CVDIP	0	0	0	0	0	0	0	0	0	1	0	0	36.5	0	4.36	145	0	75	0	0	2.01	77.9	2.08	80.6	1.65	79.3	95.4	0	0	0	1	1	1	3	0	0	0	48	1.25	72.16	0.902	18.19	0.227375
411	0	0	0	72	0	IP	0	0	0	1	0	0	0	0	0	0	0	0	36.3	0	0.03	528	1	105	0	1	3.54	106	3.62	108.4	2.83	78.2	95.3	0	0	0	1	4	0	0	0	0	0	44.67	2.73	93.49	2.55228	6.15	0.167895
412	0	0	0	79	1	IP	0	0	0	1	0	0	0	0	0	0	0		36.5	0	0.06	7817	1	78	0	1	1.15	56.7	1.07	52.7	0.94	87.9		0	0	0	1	4	0	0	0	0	0	54.67	3.37	31.84	1.07301	66.25	2.23263
413	0	0	0	80	1	sarcoidosis	0	0	0	0	0	0	1	0	0	0	0	0	36.5	0	0.03	131	0	85	0	0	2.4	110.1	2.38	109.2	1.57	66	110.1	0	0	0	1	2	0	0	0	0	0	66	1.63	75.08	1.2238	22.47	0.366261
414	0	0	0	37	1	sarcoidosis	0	0	0	0	0	0	1	0	0	0	0	0	36.6	0	0.12	432	0	84	0	0	3.49	117.9	3.58	120.9	2.98	83.2	94.3	0	0	0	1	3	0	0	0	0	0	73.33	6.15	62.26	3.82899	36.15	2.22322
416	0	0	0	88	0	OP	0	0	0	0	0	0	0	1	0	0	0	0	36	0	6.46	1466	1	74	0	0	2.07	64.9	1.9	59.6	1.43	75.3	60.7	0	0	0	1	1	1	3	1	0	0	21.33	4.87	43.87	2.13647	33.94	1.65288
417	0	0	0	61	1	other	1	0	0	0	0	0	0	0	0	0	0	0	35.8	0	0.12	502	1	69	0	1	1.75	72	1.83	75.3	1.47	80.3	55.1	0	0	0	1	3	1	2	0	0	0	48.67	4.49	44.61	2.00299	16.02	0.719298
419	0	0	0	86	0	IP	0	0	0	1	0	0	0	0	0	0	0	1	36.8	0	0.21	451	0	82	0	0								1	0	0	0	0	1	3	0	0	0	12.67	2.15	86.24	1.85416	10.31	0.221665
420	0	0	0	85	1	CVDIP	0	0	0	0	0	0	0	0	0	1	0	1	36.8	0	9.54	258	0	80	0	0								0	0	0	1	4	0	0	1	1	0	28.67	0.61	59.97	0.365817	31.94	0.194834
421	0	0	0	83	0	DRUG	0	0	0	0	0	0	0	0	0	0	1		36.1	0	1.72	437	0	111	0	0	3.12	96.3	2.85	88	2.08	73	90.5	0	0	0	1	2	0	0	0	0	0	25.33	4.85	27.8	1.3483	68.06	3.30091
422	0	0	0	71	0	sarcoidosis	0	0	0	0	0	0	1	0	0	0	0	0	36.8	0	0.16	159	0	96	0	0	3.18	99.4	3.13	97.8	2.72	86.9	139.8	0	0	0	0	0	1	2	0	1	0	55.33	0.82	81.18	0.665676	12.09	0.099138
424	0	0	0	65	0	lymphopro	0	0	0	0	0	0	0	0	1	0	0	0	36.8	0	0.2	1340	1	83	0	1	1.85	57.3	1.91	59.1	1.57	82.2	51.9	1	1	0	1	3	1	1	1	0	1	48.67	3.77	80.58	3.03787	8.52	0.321204
425	0	0	0	68	0	other	1	0	0	0	0	0	0	0	0	0	0	0	36.5	0	2.12	448	0	75	0	0								0	0	0	1	3	0	0	0	0	1	6
426	0	0	0	73	0	other	1	0	0	0	0	0	0	0	0	0	0	1	36.8	0	6.81	354	0	110	0	1								1	0	0	1	3	1	2	0	0	0	42	4.77	55.57	2.65069	35.33	1.68524
427	0	0	0	27	0	infection	0	0	0	0	0	1	0	0	0	0	0	0	36.5	0	0.4	2351	1	93	0	0								0	0	0	1	5	0	0	0	0	0	50	2.81	50.96	1.43198	44.53	1.25129
428	0	0	0	70	1	sarcoidosis	0	0	0	0	0	0	1	0	0	0	0	0	36.4	0	1.06	1161	1	91	0	0								0	0	0	1	4	0	0	0	1	1	40	4.75	44.61	2.11898	47.65	2.26337
429	0	0	0	55	1	lymphopro	0	0	0	0	0	0	0	0	1	0	0	0	36.6	0	5.27	405	0	90	0	0	3.1	123	3	119	2.49	83	91.7	1	0	0	1	5	0	0	0	0	0	60.67	1.44	93.18	1.34179	6.54	0.094176
430	0	0	0	52	0	OP	0	0	0	0	0	0	0	1	0	0	0	0	36.2	0	0.26	620	1	75	0	1	2.31	63.8	2.38	65.7	1.98	83.2	54.1	0	0	0	1	1	1	3	0	0	1	31.33	2.83	90.66	2.56568	7.18	0.203194
431	0	0	0	81	0	OP	0	0	0	0	0	0	0	1	0	0	0	0	36.7	0	20	173	0	58	1	0	2.46	77.8	2.32	73.4	1.62	69.8	108.3	0	0	0	1	2	1	3	0	0	0	34.67	0.88	69	0.6072	24.89	0.219032
432	0	0	0	83	0	sarcoidosis	0	0	0	0	0	0	1	0	0	0	0	1	36.3	0	0.15	846	1	83	0	0	2.8	87.5	2.94	91.9	2.45	83.3	87.3	0	0	0	1	2	1	2	0	1	0	17.33	2.37	76.14	1.80452	19.42	0.460254
433	0	0	0	75	1	IP	0	0	0	1	0	0	0	0	0	0	0	0	35.7	0	0.05	731	1	78	0	1	1.56	68.4	1.49	65.4	1.36	91.3	54.9	0	0	0	1	4	0	0	0	1	0	41.33	1.63	94.68	1.54328	1.61	0.026243
434	0	0	0	58	0	sarcoidosis	0	0	0	0	0	0	1	0	0	0	0		36.5	0	0.01	220	0	91	0	0	3.46	99.1	3.47	99.4	3.15	90.8	119.9	0	0	0	1	3	0	0	0	0	0	39.33	2.04	92.82	1.89353	4.2	0.08568
435	0	0	0	70	0	IP	0	0	0	1	0	0	0	0	0	0	0	0	35.9	0	2.21	2589	1	80	0	0	2.61	80.6	2.61	80.6	1.91	73.2	57	0	0	0	1	2	0	0	1	0	1	40	3.81	55.14	2.10083	33.63	1.2813
436	0	0	0	68	1	CVDIP	0	0	0	0	0	0	0	0	0	1	0		36.8	0	0.21	809	1	89	0	0	1.42	65.1	1.49	68.3	1.17	78.5	70.5	0	0	0	1	2	0	0	0	0	0	50	2.12	82.58	1.7507	15.9	0.33708
437	0	0	0	67	1	CVDIP	0	0	0	0	0	0	0	0	0	1	0		36.7	0	0.04	1205	1	85	0	0	2.77	118.4	2.73	116.7	2.16	79.1	84.5	0	0	0	1	2	0	0	0	0	0	53.33	3.86	34.05	1.31433	65.95	2.54567
438	0	0	0	34	1	CVDIP	0	0	0	0	0	0	0	0	0	1	0	0	36.4	0	0.21	787	1	100	0	1	2.25	76.3	2.32	78.6	2.23	96.1	50.4	0	0	0	1	3	0	0	0	0	0	46	2	77.41	1.5482	10.7	0.214
440	0	0	0	81	1	IP	0	0	0	1	0	0	0	0	0	0	0	2	36.9	0	1.11	600	1	76	0	0	1.15	53.7	1.18	55.1	1.06	89.8		0	0	0	1	3	0	0	0	1	0	14.67	1.06	18.77	0.198962	3.61	0.038266
441	0	0	0	77	0	IP	0	0	0	1	0	0	0	0	0	0	0	0	35.4	0	0.04	1020	1	98	0	0	3.37	105.3	3.31	103.4	2.48	74.9	109.4	0	0	0	1	2	0	0	0	0	0	41.33	5.38	96.19	5.17502	2.15	0.11567
442	0	0	0	57	1	CVDIP	0	0	0	0	0	0	0	0	0	1	0	0	36.7	0	0.88	1028	1	87	0	1	1	43.7	0.97	42.4	0.85	87.6		1	0	0	1	5	0	0	0	1	0	18	3.84	64.64	2.48218	22.33	0.857472
444	0	0	0	70	0	HP	0	0	1	0	0	0	0	0	0	0	0	0	36.6	0	0.28	565	1	102	0	0								0	0	0	1	3	0	0	0	0	0	68.67		62		37.6
447	0	0	0	81	0	other	1	0	0	0	0	0	0	0	0	0	0	0	36.6	0	1.08	143	0	75	0	0								0	0	0	1	2	0	0	0	0	1	26.67	1.95	86.3	1.68285	7.5	0.14625
449	1	0	1	68	1	EP	0	1	0	0	0	0	0	0	0	0	0	0	36.1	0	3.5	307	0	95	0	1								0	0	0	1	3	1	2	0	0	0	38	4.45	62.7	2.79015	1.2	0.0534
450	1	0	1	63	0	infection	0	0	0	0	0	1	0	0	0	0	0	0	36.7	0	8.23	211	0	97	0	0								0	0	0	1	2	1	1	0	0	0	33.33	2.59	78.6	2.03574	11.1	0.28749
451	0	0	0	37	1	sarcoidosis	0	0	0	0	0	0	1	0	0	0	0	0	37.1	0	0.02	256	0	112	0	0	3.85	132.8	3.91	134.8	3.23	82.6	103.2	0	0	0	1	1	0	0	0	0	0	78	3.45	72	2.484	27	0.9315
452	0	0	0	34	1	EP	0	1	0	0	0	0	0	0	0	0	0	0	36	0	0.33	346	0	104	0	0	2.72	94.8	2.61	90.9	1.8	69	100.1	0	0	0	1	2	1	2	0	0	0	56.67		6.3		2.5
453	0	0	0	59	1	sarcoidosis	0	0	0	0	0	0	1	0	0	0	0	0	35.9	0	0.08	495	0	95	0	0	3.13	128.3	3.23	132.4	2.57	79.6	119.7	0	0	0	1	1	0	0	0	0	0	56.67	1.08	75.3	0.81324	22.1	0.23868
454	0	0	0	31	1	sarcoidosis	0	0	0	0	0	0	1	0	0	0	0	0	35.7	0	0.01	956	1	99	0	0	3.06	99.4	3.02	98.1	1.85	61.3	96.3	0	0	0	1	5	0	0	0	0	0			95.5		4.3
456	0	0	0	52	0	IP	0	0	0	1	0	0	0	0	0	0	0	0	36.9	0	0.05	814	1	80	0	1	3.62	97.1	3.5	93.8	2.91	83.1	87.3	0	0	0	1	2	0	0	1	0	0	34	3.48	57	1.9836	1.5	0.0522
457	0	0	0	72	0	sarcoidosis	0	0	0	0	0	0	1	0	0	0	0	0	35.4	0	0.24	725	1	111	0	1	2.93	92.1	2.8	88.1	1.95	69.6	98.1	0	0	0	1	4	0	0	0	0	0	74.67	2.14	75	1.605	24	0.5136
458	0	0	0	75	1	IP	0	0	0	1	0	0	0	0	0	0	0	0	36.7	0	0.13	2329	1	107	0	1	2.32	109.4	2.39	112.7	1.79	74.9	56.7	0	0	0	1	4	0	0	0	0	0	40	15.4	15	2.31	82	12.628
459	0	0	0	79	1	IP	0	0	0	1	0	0	0	0	0	0	0	1	36.3	0	0.11	443	0	99	0	0	1.89	82.9	1.66	72.8	1.3	78.3	54.1	0	0	0	1	2	0	0	0	0	0	34	0.72	91.3	0.65736	4.6	0.03312
460	0	0	0	76	0	IP	0	0	0	1	0	0	0	0	0	0	0	0	35.5	0	0.11	375	0	108	0	1	1.85	54.4	1.92	56.5	1.56	81.3	61.4	0	0	0	1	4	0	0	0	0	1	56	3.11	93.3	2.90163	5.6	0.17416
461	1	0	1	75	1	CVDIP	0	0	0	0	0	0	0	0	0	1	0	0	36.1	0	2.04	1029	1	81	0	1	1.6	73.1	1.52	69.4	1.31	86.2	41.5	0	0	0	1	5	0	0	0	1	0	53.33	4.27	87.5	3.73625	9.1	0.38857
462	0	0	0	76	1	IP	0	0	0	1	0	0	0	0	0	0	0		36.4	0	0.11	647	1	94	0	1	2.07	90	2.08	90.4	1.58	76	41.3	0	0	0	1	4	0	0	0	1	0	60	1.42	82	1.1644	16.3	0.23146
465	0	0	0	74	0	CVDIP	0	0	0	0	0	0	0	0	0	1	0	0	36.7	0	1.97	1348	1	76	0	0	2.21	68	2.29	70.5	2.01	87.8	60.7	0	0	0	1	5	0	0	0	1	1	50	2.2	89.3	1.9646	10.3	0.2266
467	0	0	0	53	0	other	1	0	0	0	0	0	0	0	0	0	0	0	36.4	0	12.58	121	0	87	0	0	4.06	106.8	3.44	90.5	2.93	85.2		0	0	0	1	2	1	1	0	0	0	28.67	9.34	18.6	1.73724	20.3	1.89602
469	0	0	0	81	1	OP	0	0	0	0	0	0	0	1	0	0	0	0	36.5	0	0.05	860	1	77	0	1	2.06	94.5	2.15	98.6	1.67	77.7	80.3	0	0	0	1	1	1	1	0	0	0	44	2.05	43	0.8815	53	1.0865
470	0	0	0	62	0	IPF	0	0	0	0	1	0	0	0	0	0	0	0	36.5	0	0.36	2224	1	92	0	1	2.72	77.3	2.69	76.4	2.28	84.8	55.6	0	0	0	1	3	0	0	0	0	0	43.33	4.5	62.8	2.826	34	1.53
471	0	0	0	66	0	IPF	0	0	0	0	1	0	0	0	0	0	0	0	36.1	0	0.41	1086	1	109	0	1	4.28	118.9	4.32	120	3.42	79.2	62.5	0	0	0	1	1	0	0	1	1	1	46.67	2.46	89.1	2.19186	8.3	0.20418
472	0	0	0	60	0	sarcoidosis	0	0	0	0	0	0	1	0	0	0	0	0	35.9	0	0.08	686	1	88	0	0	4.09	120.6	3.92	115.6	3.21	81.9	65.2	0	0	0	1	2	0	0	0	0	1	66.67	2.44	61.4	1.49816	34	0.8296
473	0	0	0	57	1	OP	0	0	0	0	0	0	0	1	0	0	0	0	37.5	0	2.11	407	0	96	0	0	3.06	119.5	2.95	115.2	2.3	78	99.9	0	0	0	1	3	0	0	0	0	0	43.33	3.3	72	2.376	21	0.693
474	0	0	0	64	1	sarcoidosis	0	0	0	0	0	0	1	0	0	0	0	0	36.4	0	0.1			95	0	0	2.34	103.1	2.4	105.7	1.86	77.5	95.1	0	0	0	1	1	1	1	0	0	0	70	0.35	94	0.329	5.1	0.01785
475	0	0	0	80	1	IP	0	0	0	1	0	0	0	0	0	0	0	0	36.5	0	0.12	4212	1	57	1	1	2.18	94.4	2.22	96.1	1.87	84.2	34.4	0	0	0	1	3	0	0	1	1	0	38	4.16	50.5	2.1008	44.5	1.8512
476	0	0	0	68	1	sarcoidosis	0	0	0	0	0	0	1	0	0	0	0	0	36.6	0	0.11	424	0	75	0	0	2.5	108.7	2.52	109.6	1.8	71.4	101.8	0	0	0	1	1	0	0	0	0	0	40	1.2	83	0.996	12	0.144
478	0	0	0	56	1	sarcoidosis	0	0	0	0	0	0	1	0	0	0	0	0	36.9	0	0.53	535	1	90	0	0	2.98	116.4	2.88	112.5	2.5	86.8	69.8	0	0	0	1	2	0	0	0	0	0	56.67	1.04	65.6	0.68224	32.7	0.34008
481	0	0	0	55	1	other	1	0	0	0	0	0	0	0	0	0	0	0	36.1	0	0.66	362	0	67	0	0	1.34	55.4	1.24	51.2	1.03	83.1		0	0	0	0	0	1	4	0	1	0	56	0.9	27	0.243	3	0.027
484	0	0	0	73	0	lymphopro	0	0	0	0	0	0	0	0	1	0	0	2	36	0	2.75	131	0	99	0	0								0	0	0	1	2	0	0	0	0	0	56	2.7	94.6	2.5542	4.6	0.1242
485	0	0	0	66	0	other	1	0	0	0	0	0	0	0	0	0	0	0	35.2	0	0.05	362	0	96	0	0	1.91	60.3	1.99	62.8	1.57	78.9	35.9	0	0	0	1	1	1	1	0	1	1	8	1.92	73	1.4016	6.1	0.11712
486	0	0	0	75	1	other	1	0	0	0	0	0	0	0	0	0	0		36.3	0	0.04	308	0	88	0	0	2.2	104.3	2.23	105.7	1.81	81.2	67	0	0	0	1	2	0	0	0	0	0	43.33	0.94	83.6	0.78584	15.7	0.14758
487	0	0	0	76	0	OP	0	0	0	0	0	0	0	1	0	0	0	0	36.7	0	4.6	669	1	94	0	0	2.7	81.3	2.57	77.4	2.06	80.2	62.3	0	0	0	1	4	0	0	0	0	0	18	9.23	56.7	5.23341	25.7	2.37211
489	0	0	0	64	0	EP	0	1	0	0	0	0	0	0	0	0	0	0	36.7	0	0.02	504	1	71	0	0								0	0	0	1	3	0	0	0	0	1	20	0.75	28.8	0.216	60	0.45
492	0	0	0	77	1	other	1	0	0	0	0	0	0	0	0	0	0	0	36.8	0	0.61	3422	1	61	0	1	1.59	71.3	1.61	72.2	1.3	80.7	58.1	0	0	0	1	5	0	0	0	0	0	21.33	14.78	6	0.8868	8.7	1.28586
494	0	0	0	85	0	OP	0	0	0	0	0	0	0	1	0	0	0	0	36.5	0	0.11	3148	1	81	0	1	2.36	77.4	2.33	76.4	1.93	82.8	47.8	0	0	0	1	4	0	0	0	0	0	44.67	4.95	45.3	2.24235	50.4	2.4948
496	0	0	0	32	1	HP	0	0	1	0	0	0	0	0	0	0	0	0	36.7	0	0.18	611	1	99	0	0	1.77	61.7	1.61	56.1	1.5	93.2	42.6	0	0	0	1	2	1	2	0	0	0	65.33	3.93	51.87	2.03849	41.46	1.62938
497	0	0	0	39	1	EP	0	1	0	0	0	0	0	0	0	0	0	0	36.7	0	1.66	153	0	91	0	0								1	0	0	1	2	0	0	0	0	0	41.33	2.35	66	1.551	5.3	0.12455
498	0	0	0	63	0	IP	0	0	0	1	0	0	0	0	0	0	0	0	36.3	0	0.1	1352	1	89	0	1	2.1	60.3	2.14	61.5	1.89	88.3	40.9	0	0	0	1	3	0	0	1	0	0	58.67	1.74	85.5	1.4877	9.8	0.17052
500	0	0	0	66	0	HP	0	0	1	0	0	0	0	0	0	0	0		36.7	0	20.05	471	0	65	0	1	2.51	74.9	2.4	71.6	1.54	64.2	39.4	0	0	0	1	5	0	0	0	0	0	50	11.85	55.5	6.57675	23.8	2.8203
[truncated: 9 more columns]
